# Supplementary material
Source: publisher figshare collection journal article supplement (https://acs.figshare.com/ndownloader/files/6039633)
Supplement: Supplementary file 1 [file 6039633]

#==============================================================================
data_global
#==============================================================================

_publ_contact_author            'Andrew S. Weller & Stuart A. Macgregor'
_publ_contact_author_email          
 'andrew.weller@chem.ox.ac.uk; s.a.macgregor@hw.ac.uk'

loop_
_publ_author_name
_publ_author_address
 'McKay, Alasdair I.'
;    
Chemistry Research Laboratory,
University of Oxford,
Mansfield Road, 
Oxford OX1 3TA. UK.
;
 'Kr\"amer, Tobias'
;    
Institute of Chemical Sciences, 
Heriot-Watt University, 
Edinburgh, EH14 4S. UK
;
 'Rees, Nicholas H.'
;    
Chemistry Research Laboratory,
University of Oxford,
Mansfield Road, 
Oxford OX1 3TA. UK.
;
 'Thompson, Amber L.'
;    
Chemical Crystallography Department,
Chemistry Research Laboratory,
University of Oxford,
Mansfield Road, 
Oxford OX1 3TA. UK.
;
 'Christensen, Kirsten E.'
;    
Chemical Crystallography Department,
Chemistry Research Laboratory,
University of Oxford,
Mansfield Road, 
Oxford OX1 3TA. UK.
;
 'Weller, Andrew S.'
;    
Chemistry Research Laboratory,
University of Oxford,
Mansfield Road, 
Oxford OX1 3TA. UK.
;
 'Macgregor, Stuart A.'
;    
Institute of Chemical Sciences, 
Heriot-Watt University, 
Edinburgh, EH14 4S. UK
;

_publ_requested_journal                 
 'Organometallics'
_journal_volume                    '?'
_journal_page_first                '?'
_journal_page_last                 '?'
_journal_year                      '2016'
_ccdc_journal_depnumber            '?'

_publ_section_title
;
Formation of a \s-alkane Complex and a Molecular Rearrangement in the 
Solid-State: [Rh(Cyp~2~PCH~2~CH~2~PCyp~2~)(\e^2^:\e^2^-C~7~H~12~)][BAr^F^~4~]
;

_publ_section_abstract
;  
Addition of H~2~ to the precursor 
[Rh(Cyp~2~PCH~2~CH~2~PCyp~2~)(\e^2^:\e^2^-C~7~H~8~)][BAr^F^~4~] gives the 
\s-alkane complex 
[Rh(Cyp~2~PCH~2~CH~2~PCyp~2~)(\e^2^:\e^2^-C~7~H~12~)][BAr^F^~4~] by a 
single-crystal to single�crystal reaction, as characterized by X-ray 
crystallography, SSNMR spectroscopy and periodic DFT. An unexpected 
rearrangement of the {Rh(L~2~)}^+^ fragment is revealed.
;


#==============================================================================
data_3-NBD
#==============================================================================
_audit_creation_date        "2016-08-01"
_audit_creation_method CRYSTALS_ver_14.61_build_6019 

_oxford_structure_analysis_title  '6615 (043am16)'
_chemical_name_systematic         .
_chemical_melting_point           'not measured'

_cell_length_a                    18.6873(2)
_cell_length_b                    17.1358(2)
_cell_length_c                    19.1967(3)
_cell_angle_alpha                 90
_cell_angle_beta                  92.3341(13)
_cell_angle_gamma                 90
_cell_volume                      6142.10(14)

_refine_special_details
;
These data were found to exhibit addition reflections that were not 
indexed by the unit cell.  Initially these were thought to be due to 
splitting of the crystal, a second crystal, or twinning (without merohedry).  
Further examination of the data using the reciprocal lattice viewer and 
reconstructions of reciprocal lattice sections demonstrated the presence 
of satellites that were preliminarily indexed with 
q = [0.000(1) 0.3455(9) 0.000(1)].  Initially just the main reflections 
were integrated, and the average structure determined with the worst 
disorder modeled.  The modulated description is presented separately; see
supplementary information for more details.
;
 
_symmetry_cell_setting            'monoclinic' 
_symmetry_space_group_name_H-M    'C 2/c ' 
_symmetry_space_group_name_Hall   '-C 2yc' 
loop_
 _symmetry_equiv_pos_as_xyz
 'x,y,z'
 '-x,-y,-z'
 'x+1/2,y+1/2,z'
 '-x+1/2,-y+1/2,-z'
 'x,-y,z+1/2'
 '-x,y,-z+1/2'
 'x+1/2,-y+1/2,z+1/2'
 '-x+1/2,y+1/2,-z+1/2'

loop_
_atom_type_symbol
_atom_type_scat_dispersion_real
_atom_type_scat_dispersion_imag
_atom_type_scat_Cromer_Mann_a1
_atom_type_scat_Cromer_Mann_b1
_atom_type_scat_Cromer_Mann_a2
_atom_type_scat_Cromer_Mann_b2
_atom_type_scat_Cromer_Mann_a3
_atom_type_scat_Cromer_Mann_b3
_atom_type_scat_Cromer_Mann_a4
_atom_type_scat_Cromer_Mann_b4
_atom_type_scat_Cromer_Mann_c
_atom_type_scat_source  
 Rh      0.0927   3.6045  19.2957   0.7515  14.3501   8.2176   4.7343  25.8749
   1.2892  98.6062   5.3280 'International Tables Vol C 4.2.6.8 and 6.1.1.4'
 B       0.0090   0.0039   2.0545  23.2185   1.3326   1.0210   1.0979  60.3498
   0.7068   0.1403  -0.1932 'International Tables Vol C 4.2.6.8 and 6.1.1.4'
 F       0.0727   0.0534   3.5392  10.2825   2.6412   4.2944   1.5170   0.2615
   1.0243  26.1476   0.2776 'International Tables Vol C 4.2.6.8 and 6.1.1.4'
 P       0.2955   0.4335   6.4345   1.9067   4.1791  27.1570   1.7800   0.5260
   1.4908  68.1645   1.1149 'International Tables Vol C 4.2.6.8 and 6.1.1.4'
 C       0.0181   0.0091   2.3100  20.8439   1.0200  10.2075   1.5886   0.5687
   0.8650  51.6512   0.2156 'International Tables Vol C 4.2.6.8 and 6.1.1.4'
 H       0.0000   0.0000   0.4930  10.5109   0.3229  26.1257   0.1402   3.1424
   0.0408  57.7998   0.0030 'International Tables Vol C 4.2.6.8 and 6.1.1.4'
 
 
_cell_formula_units_Z                    4

# Given Formula = C61 H60 B1 F24 P2 Rh1 
# Dc =      1.54 Fooo =   2888.00 Mu =     37.50 M =   1424.76
# Found Formula = C61.00 H59.98 B1 F24 P2 Rh1 
# Dc =      1.54 FOOO =   2887.93 Mu =     37.50 M =   1424.74

_chemical_formula_sum             'C61 H60 B1 F24 P2 Rh1'
_chemical_formula_moiety          'C29 H48 P2 Rh1, C32 H12 B F24'
_chemical_compound_source                .
_chemical_formula_weight           1424.74
 
 
_cell_measurement_reflns_used        12873
_cell_measurement_theta_min              4
_cell_measurement_theta_max             75
_cell_measurement_temperature          150
 
_exptl_crystal_description        'block' 
_exptl_crystal_colour             'clear_intense_orange' 
_exptl_crystal_size_min           0.20 
_exptl_crystal_size_mid           0.22 
_exptl_crystal_size_max           0.35 
 
_exptl_crystal_density_diffrn     1.541 
_exptl_crystal_density_meas       'not measured' 
_exptl_crystal_density_method     'not measured' 
# Non-dispersive F(000): 
_exptl_crystal_F_000              2887.930 
_exptl_absorpt_coefficient_mu     3.750 
 
# Sheldrick geometric approximatio 0.44 0.47 
_exptl_absorpt_correction_type    multi-scan 
_exptl_absorpt_process_details    'CrysAlisPro, (Agilent, 2011)' 
_exptl_absorpt_correction_T_min   0.32 
_exptl_absorpt_correction_T_max   0.47 
_diffrn_measurement_device_type   'Oxford Diffraction SuperNova' 
_diffrn_measurement_device        'Area' 
_diffrn_radiation_monochromator   'graphite' 
_diffrn_radiation_type            'Cu K\a'
_diffrn_radiation_wavelength           1.5418
_diffrn_measurement_method        \w 
 
# If a reference occurs more than once, delete the author 
# and date from subsequent references. 
_computing_data_collection        'SuperNova, (Oxford Diffraction, 2010)' 
_computing_cell_refinement        'CrysAlisPro, (Agilent, 2011)' 
_computing_data_reduction         'CrysAlisPro, (Agilent, 2011)' 
_computing_structure_solution     'Superflip (Palatinus & Chapuis, 2007)' 
_computing_structure_refinement   'CRYSTALS (Betteridge et al., 2003)' 
_computing_publication_material   'CRYSTALS (Betteridge et al., 2003)' 
_computing_molecular_graphics     'CAMERON (Watkin et al., 1996)' 
 
_diffrn_standards_interval_time   . 
_diffrn_standards_interval_count  . 
_diffrn_standards_number          0 
_diffrn_standards_decay_%         . 
 
_diffrn_ambient_temperature        150
_diffrn_reflns_number             21098 
_reflns_number_total              6217 
_diffrn_reflns_av_R_equivalents   0.037 
# Number of reflections with Friedels Law is 6217 
# Theoretical number of reflections is about 12663 
 
 
_diffrn_reflns_theta_min          3.501 
_diffrn_reflns_theta_max          75.060 
_diffrn_measured_fraction_theta_max 0.982 
 
_diffrn_reflns_theta_full         71.307 
_diffrn_measured_fraction_theta_full 0.996 
 
 
_diffrn_reflns_limit_h_min        -22 
_diffrn_reflns_limit_h_max        23 
_diffrn_reflns_limit_k_min        -21 
_diffrn_reflns_limit_k_max        21 
_diffrn_reflns_limit_l_min        -24 
_diffrn_reflns_limit_l_max        15 
_reflns_limit_h_min               -23 
_reflns_limit_h_max               23 
_reflns_limit_k_min               0 
_reflns_limit_k_max               21 
_reflns_limit_l_min               0 
_reflns_limit_l_max               24 
 
_oxford_diffrn_Wilson_B_factor    2.82 
_oxford_diffrn_Wilson_scale       55.74 
 
_atom_sites_solution_primary      Other  #heavy,direct,difmap,geom,iterative
# _atom_sites_solution_secondary  difmap
_atom_sites_solution_hydrogens    difmap
 
_refine_diff_density_min          -1.29 
_refine_diff_density_max          2.30 
 
 
# The current dictionary definitions do not cover the 
# situation where the reflections used for refinement were 
# selected by a user-defined sigma threshold 
 
 
# The values actually used during refinement 
_oxford_reflns_threshold_expression_ref     I>-3.0\s(I)
_refine_ls_number_reflns          6190 
_refine_ls_number_restraints      1155 
_refine_ls_number_parameters      600 
_oxford_refine_ls_R_factor_ref    0.0818 
_refine_ls_wR_factor_ref          0.2191 
_refine_ls_goodness_of_fit_ref    1.0263 
_refine_ls_shift/su_max           0.0060758 
_refine_ls_shift/su_mean          0.0001962 
 
 
# The values computed with all filters except I/sigma 
_oxford_reflns_number_all         6190 
_refine_ls_R_factor_all           0.0818 
_refine_ls_wR_factor_all          0.2191 
 
# The values computed with a 2 sigma cutoff - a la SHELX 
_reflns_threshold_expression      I>2.0\s(I)
_reflns_number_gt                 5824 
_refine_ls_R_factor_gt            0.0792 
_refine_ls_wR_factor_gt           0.2161 
 
# choose from: rm (reference molecule of known chirality), 
# ad (anomolous dispersion - Flack), rmad (rm and ad), 
# syn (from synthesis), unk (unknown) or . (not applicable). 
_chemical_absolute_configuration  '.' 
 
 
_refine_ls_structure_factor_coef  Fsqd 
_refine_ls_matrix_type            full
_refine_ls_hydrogen_treatment     constr         #undef, noref, refall,
                                                 # refxyz, refU, constr or mixed
_refine_ls_weighting_scheme       calc 
_refine_ls_weighting_details 
;
 Method= Modified Sheldrick 
 w=1/[\s^2^(F^2^) + ( 0.12P)^2^ +50.65P] 
 ,where P=(max(Fo^2^,0) + 2Fc^2^)/3 
;
# Insert your own references if required - in alphabetical order 
_publ_section_references 
; 
Betteridge, P.W., Carruthers, J.R., Cooper, R.I., 
Prout, K. & Watkin, D.J. (2003). J. Appl. Cryst. 36, 1487. 
 
Agilent (2011). CrysAlisPro. 
 
Oxford Diffraction, (2010). Supernova User Manual. 
 
Palatinus, L. & Chapuis, G. (2007). J. Appl. Cryst. 40, 786-790. 
 
Watkin, D.J., Prout, C.K. & Pearce, L.J. (1996). CAMERON, Chemical 
Crystallography Laboratory, Oxford, UK. 
; 

# Uequiv = arithmetic mean of Ui i.e. Ueqiv = (U1+U2+U3)/3

# Replace last . with number of unfound hydrogen atoms attached to an atom.

# ..._refinement_flags_... 
# . no refinement constraints           S special position constraint on site
# G rigid group refinement of site      R riding atom
# D distance or angle restraint on site T thermal displacement constraints
# U Uiso or Uij restraint (rigid bond)  P partial occupancy constraint


loop_
_atom_site_label
_atom_site_type_symbol
_atom_site_fract_x
_atom_site_fract_y
_atom_site_fract_z
_atom_site_U_iso_or_equiv
_atom_site_occupancy
_atom_site_adp_type
_atom_site_refinement_flags_posn
_atom_site_refinement_flags_adp
_atom_site_refinement_flags_occupancy
_atom_site_disorder_assembly
_atom_site_disorder_group
_atom_site_attached_hydrogens
Rh1 Rh 0.0000 0.19895(3) 0.2500 0.0373 1.0000 Uani S TU . . . . 
P1 P -0.02494(6) 0.29650(7) 0.32538(7) 0.0366 1.0000 Uani . U . . . . 
C1 C -0.0570(5) 0.0975(3) 0.2920(4) 0.0739 1.0000 Uani . . . . . . 
C2 C 0.0094(5) 0.0984(4) 0.3221(4) 0.0720 1.0000 Uani . . . . . . 
C3 C 0.0545(5) 0.0476(4) 0.2740(5) 0.0878 1.0000 Uani . . . . . . 
C7 C 0.000000(10) -0.0133(5) 0.250000(10) 0.1026 1.0000 Uani S T . . . . 
C8 C -0.1195(2) 0.3133(3) 0.3451(3) 0.0468 1.0000 Uani D U . . . . 
C9 C -0.1682(4) 0.3072(8) 0.2791(4) 0.0625 0.71(2) Uani D U P 1 1 . 
C10 C -0.2408(4) 0.2848(9) 0.3080(7) 0.0790 0.71(2) Uani D U P 1 1 . 
C11 C -0.2214(5) 0.2287(8) 0.3662(7) 0.0929 0.71(2) Uani D U P 1 1 . 
C12 C -0.1482(5) 0.2523(10) 0.3942(6) 0.0649 0.71(2) Uani D U P 1 1 . 
C13 C 0.0148(14) 0.271(2) 0.4107(16) 0.0620 0.27(3) Uani D U P 2 1 . 
C14 C 0.0119(15) 0.333(2) 0.4662(16) 0.0628 0.27(3) Uani D U P 2 1 . 
C15 C 0.0803(16) 0.3237(18) 0.5105(12) 0.0541 0.27(3) Uani D U P 2 1 . 
C16 C 0.1346(12) 0.292(2) 0.4608(19) 0.0625 0.27(3) Uani D U P 2 1 . 
C17 C 0.0920(16) 0.247(2) 0.4063(12) 0.0649 0.27(3) Uani D U P 2 1 . 
C18 C 0.0050(3) 0.3901(3) 0.2896(4) 0.0562 1.0000 Uani . U . . . . 
C109 C -0.1744(8) 0.327(2) 0.2865(9) 0.0592 0.29(2) Uani D U P 1 2 . 
C110 C -0.2466(5) 0.3101(19) 0.3154(12) 0.0645 0.29(2) Uani D U P 1 2 . 
C111 C -0.2336(7) 0.2806(16) 0.3887(10) 0.0631 0.29(2) Uani D U P 1 2 . 
C112 C -0.1555(9) 0.2571(19) 0.3943(15) 0.0564 0.29(2) Uani D U P 1 2 . 
C113 C 0.0218(5) 0.2917(10) 0.4114(6) 0.0653 0.73(3) Uani D U P 2 2 . 
C114 C 0.0089(6) 0.3600(12) 0.4602(7) 0.0868 0.73(3) Uani D U P 2 2 . 
C115 C 0.0652(8) 0.3470(14) 0.5189(5) 0.0922 0.73(3) Uani D U P 2 2 . 
C116 C 0.1286(6) 0.3104(11) 0.4850(8) 0.0834 0.73(3) Uani D U P 2 2 . 
C117 C 0.1038(5) 0.2860(12) 0.4122(6) 0.0735 0.73(3) Uani D U P 2 2 . 
B1 B 0.0000 0.7211(4) 0.2500 0.0252 1.0000 Uani S T . . . . 
C38 C -0.0135(2) 0.7798(2) 0.3156(2) 0.0272 1.0000 Uani . . . . . . 
C39 C -0.0819(2) 0.8090(3) 0.3292(3) 0.0350 1.0000 Uani . . . . . . 
C40 C -0.0929(2) 0.8618(3) 0.3823(2) 0.0520 1.0000 Uani D . . . . . 
C41 C -0.0370(3) 0.8904(3) 0.4229(3) 0.0458 1.0000 Uani . . . . . . 
C42 C 0.0313(2) 0.8636(2) 0.4106(2) 0.0432 1.0000 Uani D . . . . . 
C43 C 0.0428(2) 0.8103(2) 0.3579(2) 0.0315 1.0000 Uani . . . . . . 
C44 C -0.16643(14) 0.8954(2) 0.39259(16) 0.0685 1.0000 Uani D . . . . . 
C45 C 0.09385(14) 0.89804(16) 0.45244(13) 0.0566 1.0000 Uani D . . . . . 
C46 C 0.0678(2) 0.6623(2) 0.2668(2) 0.0303 1.0000 Uani . . . . . . 
C47 C 0.0815(3) 0.6322(3) 0.3334(3) 0.0417 1.0000 Uani . . . . . . 
C48 C 0.1325(3) 0.5772(3) 0.3487(2) 0.0628 1.0000 Uani D . . . . . 
C49 C 0.1775(4) 0.5515(4) 0.2968(3) 0.0603 1.0000 Uani . . . . . . 
C50 C 0.1646(2) 0.5788(3) 0.2295(2) 0.0576 1.0000 Uani D . . . . . 
C51 C 0.1107(3) 0.6333(3) 0.2148(3) 0.0373 1.0000 Uani . . . . . . 
C52 C 0.14182(19) 0.5492(2) 0.42325(14) 0.0769 1.0000 Uani D . . . . . 
C53 C 0.20889(17) 0.5517(2) 0.16998(16) 0.0758 1.0000 Uani D . . . . . 
F7 F -0.1672(3) 0.9732(4) 0.3856(8) 0.0719 0.343(14) Uani D . P 3 1 . 
F8 F -0.2147(3) 0.8674(7) 0.3468(6) 0.0744 0.343(14) Uani D . P 3 1 . 
F9 F -0.1896(4) 0.8798(8) 0.4552(4) 0.0712 0.343(14) Uani D . P 3 1 . 
F10 F 0.0761(2) 0.9178(5) 0.5164(2) 0.0609 0.83(2) Uani D . P 4 1 . 
F11 F 0.1483(2) 0.8482(3) 0.4593(4) 0.0695 0.83(2) Uani D . P 4 1 . 
F12 F 0.1190(4) 0.9620(4) 0.4229(3) 0.0858 0.83(2) Uani D . P 4 1 . 
F13 F 0.1663(7) 0.4763(4) 0.4268(2) 0.0692 0.396(16) Uani D . P 5 1 . 
F14 F 0.0806(4) 0.5503(8) 0.4560(3) 0.0883 0.396(16) Uani D . P 5 1 . 
F15 F 0.1875(6) 0.5927(6) 0.4600(3) 0.0984 0.396(16) Uani D . P 5 1 . 
F16 F 0.1704(3) 0.5099(6) 0.1236(3) 0.0802 0.702(19) Uani D . P 6 1 . 
F17 F 0.2638(4) 0.5071(6) 0.1920(3) 0.0902 0.702(19) Uani D . P 6 1 . 
F18 F 0.2361(5) 0.6109(3) 0.1358(4) 0.0949 0.702(19) Uani D . P 6 1 . 
F107 F -0.1787(3) 0.9580(5) 0.3539(4) 0.0964 0.657(14) Uani D . P 3 2 . 
F108 F -0.2176(2) 0.8449(4) 0.3761(5) 0.0891 0.657(14) Uani D . P 3 2 . 
F109 F -0.1751(3) 0.9162(5) 0.4580(3) 0.0679 0.657(14) Uani D . P 3 2 . 
F110 F 0.0872(8) 0.8885(14) 0.5205(3) 0.0572 0.17(2) Uani D . P 4 2 . 
F111 F 0.1553(3) 0.8656(12) 0.4366(11) 0.0584 0.17(2) Uani D . P 4 2 . 
F112 F 0.1004(10) 0.9743(5) 0.4415(11) 0.0588 0.17(2) Uani D . P 4 2 . 
F113 F 0.1923(4) 0.4958(5) 0.4305(2) 0.0952 0.604(16) Uani D . P 5 2 . 
F114 F 0.0817(3) 0.5175(5) 0.4462(3) 0.0780 0.604(16) Uani D . P 5 2 . 
F115 F 0.1598(5) 0.6074(3) 0.4670(2) 0.0700 0.604(16) Uani D . P 5 2 . 
F116 F 0.1695(3) 0.5420(12) 0.1118(4) 0.0827 0.298(19) Uani D . P 6 2 . 
F117 F 0.2412(9) 0.4838(7) 0.1839(5) 0.0741 0.298(19) Uani D . P 6 2 . 
F118 F 0.2599(8) 0.6025(6) 0.1559(8) 0.0865 0.298(19) Uani D . P 6 2 . 
H11 H -0.1002 0.1042 0.3183 0.0891 1.0000 Uiso R . . . . . 
H21 H 0.0201 0.1051 0.3719 0.0861 1.0000 Uiso R . . . . . 
H31 H 0.1007 0.0279 0.2926 0.1062 1.0000 Uiso R . . . . . 
H82 H -0.1186 0.3623 0.3713 0.0560 0.29(2) Uiso R . P 1 2 . 
H81 H -0.1249 0.3646 0.3662 0.0561 0.71(2) Uiso R . P 1 1 . 
H91 H -0.1704 0.3570 0.2550 0.0741 0.71(2) Uiso R . P 1 1 . 
H92 H -0.1519 0.2675 0.2474 0.0738 0.71(2) Uiso R . P 1 1 . 
H102 H -0.2647 0.3301 0.3261 0.0940 0.71(2) Uiso R . P 1 1 . 
H101 H -0.2715 0.2594 0.2731 0.0940 0.71(2) Uiso R . P 1 1 . 
H112 H -0.2560 0.2316 0.4026 0.1100 0.71(2) Uiso R . P 1 1 . 
H111 H -0.2196 0.1760 0.3482 0.1101 0.71(2) Uiso R . P 1 1 . 
H121 H -0.1518 0.2745 0.4402 0.0779 0.71(2) Uiso R . P 1 1 . 
H122 H -0.1170 0.2072 0.3970 0.0781 0.71(2) Uiso R . P 1 1 . 
H131 H -0.0103 0.2254 0.4281 0.0749 0.27(3) Uiso R . P 2 1 . 
H141 H -0.0303 0.3255 0.4934 0.0779 0.27(3) Uiso R . P 2 1 . 
H142 H 0.0103 0.3850 0.4450 0.0781 0.27(3) Uiso R . P 2 1 . 
H152 H 0.0958 0.3732 0.5305 0.0691 0.27(3) Uiso R . P 2 1 . 
H151 H 0.0722 0.2867 0.5477 0.0690 0.27(3) Uiso R . P 2 1 . 
H162 H 0.1620 0.3349 0.4419 0.0800 0.27(3) Uiso R . P 2 1 . 
H161 H 0.1664 0.2562 0.4857 0.0800 0.27(3) Uiso R . P 2 1 . 
H171 H 0.1094 0.2635 0.3616 0.0831 0.27(3) Uiso R . P 2 1 . 
H172 H 0.0978 0.1912 0.4113 0.0831 0.27(3) Uiso R . P 2 1 . 
H182 H -0.0215 0.4320 0.3089 0.0670 1.0000 Uiso R . . . . . 
H181 H 0.0558 0.3981 0.3020 0.0672 1.0000 Uiso R . . . . . 
H1091 H -0.1720 0.3811 0.2711 0.0710 0.29(2) Uiso R . P 1 2 . 
H1092 H -0.1657 0.2926 0.2476 0.0709 0.29(2) Uiso R . P 1 2 . 
H1102 H -0.2751 0.3574 0.3162 0.0770 0.29(2) Uiso R . P 1 2 . 
H1101 H -0.2715 0.2707 0.2875 0.0770 0.29(2) Uiso R . P 1 2 . 
H1112 H -0.2425 0.3211 0.4223 0.0771 0.29(2) Uiso R . P 1 2 . 
H1111 H -0.2642 0.2360 0.3971 0.0770 0.29(2) Uiso R . P 1 2 . 
H1121 H -0.1362 0.2627 0.4418 0.0669 0.29(2) Uiso R . P 1 2 . 
H1122 H -0.1496 0.2036 0.3791 0.0670 0.29(2) Uiso R . P 1 2 . 
H1131 H 0.0043 0.2452 0.4353 0.0779 0.73(3) Uiso R . P 2 2 . 
H1141 H -0.0394 0.3577 0.4773 0.1010 0.73(3) Uiso R . P 2 2 . 
H1142 H 0.0153 0.4099 0.4362 0.1009 0.73(3) Uiso R . P 2 2 . 
H1152 H 0.0778 0.3967 0.5406 0.1070 0.73(3) Uiso R . P 2 2 . 
H1151 H 0.0463 0.3123 0.5535 0.1070 0.73(3) Uiso R . P 2 2 . 
H1162 H 0.1672 0.3478 0.4828 0.0960 0.73(3) Uiso R . P 2 2 . 
H1161 H 0.1446 0.2648 0.5116 0.0962 0.73(3) Uiso R . P 2 2 . 
H1171 H 0.1226 0.3216 0.3780 0.0857 0.73(3) Uiso R . P 2 2 . 
H1172 H 0.1197 0.2333 0.4027 0.0861 0.73(3) Uiso R . P 2 2 . 
H391 H -0.1211 0.7918 0.3018 0.0418 1.0000 Uiso R . . . . . 
H411 H -0.0443 0.9268 0.4576 0.0551 1.0000 Uiso R . . . . . 
H431 H 0.0892 0.7940 0.3508 0.0377 1.0000 Uiso R . . . . . 
H471 H 0.0547 0.6509 0.3702 0.0500 1.0000 Uiso R . . . . . 
H491 H 0.2150 0.5176 0.3072 0.0720 1.0000 Uiso R . . . . . 
H511 H 0.1029 0.6497 0.1690 0.0448 1.0000 Uiso R . . . . . 
H71 H -0.0162 -0.0462 0.2874 0.1250 1.0000 Uiso R . . . . . 
loop_
_atom_site_aniso_label
_atom_site_aniso_U_11
_atom_site_aniso_U_22
_atom_site_aniso_U_33
_atom_site_aniso_U_23
_atom_site_aniso_U_13
_atom_site_aniso_U_12
Rh1 0.0540(4) 0.0230(3) 0.0361(3) 0.0000 0.0183(2) 0.0000 
P1 0.0328(6) 0.0385(7) 0.0387(6) -0.0112(5) 0.0043(4) -0.0006(4) 
C1 0.107(6) 0.026(3) 0.094(5) 0.002(3) 0.066(5) -0.011(3) 
C2 0.110(6) 0.038(3) 0.071(4) 0.021(3) 0.037(4) 0.009(3) 
C3 0.115(7) 0.040(3) 0.112(7) 0.018(4) 0.051(5) 0.021(4) 
C7 0.158(13) 0.025(4) 0.130(11) 0.0000 0.080(10) 0.0000 
C8 0.0342(11) 0.053(3) 0.053(2) -0.0184(18) 0.0077(12) 0.0008(15) 
C9 0.032(2) 0.095(8) 0.061(3) -0.022(4) 0.003(2) 0.012(4) 
C10 0.035(3) 0.105(9) 0.098(7) -0.046(5) 0.009(3) -0.008(4) 
C11 0.056(5) 0.102(8) 0.122(8) -0.020(6) 0.029(5) -0.028(5) 
C12 0.055(4) 0.081(7) 0.060(5) -0.015(4) 0.028(3) -0.011(5) 
C13 0.060(6) 0.081(9) 0.044(3) -0.019(3) -0.012(5) 0.015(8) 
C14 0.072(10) 0.078(13) 0.039(5) -0.014(7) -0.001(7) 0.008(10) 
C15 0.075(11) 0.060(12) 0.027(8) -0.001(7) -0.001(6) -0.007(9) 
C16 0.061(7) 0.083(14) 0.042(11) -0.015(10) -0.005(8) -0.007(9) 
C17 0.059(7) 0.092(14) 0.042(8) -0.022(8) -0.017(6) 0.016(9) 
C18 0.054(3) 0.0294(16) 0.086(4) -0.017(2) 0.017(3) -0.008(2) 
C109 0.035(4) 0.081(13) 0.062(6) -0.016(8) 0.006(4) 0.017(8) 
C110 0.034(2) 0.088(14) 0.072(9) -0.037(10) 0.007(5) 0.005(8) 
C111 0.038(5) 0.079(13) 0.074(9) -0.029(9) 0.017(6) -0.006(7) 
C112 0.041(5) 0.070(11) 0.059(10) -0.016(8) 0.020(6) -0.001(8) 
C113 0.041(2) 0.115(7) 0.040(2) -0.020(2) 0.000(2) -0.002(4) 
C114 0.060(5) 0.145(10) 0.055(5) -0.049(6) -0.002(4) -0.009(5) 
C115 0.075(7) 0.159(13) 0.043(4) -0.019(5) -0.003(3) -0.039(7) 
C116 0.059(4) 0.141(11) 0.049(5) 0.009(6) -0.015(4) -0.026(5) 
C117 0.040(3) 0.122(10) 0.058(4) -0.012(5) -0.009(2) -0.005(5) 
B1 0.025(3) 0.020(3) 0.030(3) 0.0000 -0.002(2) 0.0000 
C38 0.0273(19) 0.0205(18) 0.034(2) 0.0006(15) 0.0041(16) -0.0017(15) 
C39 0.028(2) 0.037(2) 0.040(2) -0.0014(19) 0.0012(18) 0.0023(17) 
C40 0.041(2) 0.062(3) 0.053(3) -0.009(2) 0.011(2) 0.015(2) 
C41 0.052(3) 0.041(3) 0.045(3) -0.015(2) 0.009(2) 0.004(2) 
C42 0.047(2) 0.038(2) 0.045(2) -0.0142(19) 0.0043(19) -0.0115(19) 
C43 0.029(2) 0.025(2) 0.040(2) -0.0041(17) 0.0035(17) -0.0023(16) 
C44 0.048(2) 0.090(3) 0.069(2) -0.013(2) 0.0133(19) 0.021(2) 
C45 0.060(2) 0.058(2) 0.052(2) -0.0180(18) 0.0016(18) -0.0199(18) 
C46 0.033(2) 0.0204(19) 0.037(2) -0.0042(16) -0.0074(17) 0.0020(15) 
C47 0.055(3) 0.030(2) 0.040(2) -0.0009(19) -0.006(2) 0.011(2) 
C48 0.079(3) 0.052(3) 0.055(3) 0.003(2) -0.015(3) 0.027(3) 
C49 0.068(4) 0.045(3) 0.066(4) -0.016(3) -0.025(3) 0.034(3) 
C50 0.055(3) 0.050(3) 0.066(3) -0.018(2) -0.009(2) 0.030(2) 
C51 0.038(2) 0.033(2) 0.040(2) -0.0069(19) -0.0071(19) 0.0120(19) 
C52 0.089(3) 0.075(3) 0.066(2) 0.015(2) -0.010(2) 0.021(2) 
C53 0.073(3) 0.071(3) 0.083(3) -0.017(2) 0.004(2) 0.039(2) 
F7 0.055(4) 0.083(4) 0.078(5) -0.015(5) -0.002(4) 0.016(4) 
F8 0.043(4) 0.108(5) 0.073(5) -0.020(5) 0.016(4) 0.011(4) 
F9 0.050(4) 0.090(6) 0.075(4) -0.004(5) 0.022(4) 0.016(4) 
F10 0.074(3) 0.058(3) 0.051(2) -0.0251(19) -0.0041(19) -0.005(2) 
F11 0.052(2) 0.091(3) 0.065(3) -0.028(3) -0.009(2) -0.010(2) 
F12 0.101(3) 0.086(3) 0.070(3) -0.005(2) -0.003(3) -0.058(3) 
F13 0.065(5) 0.066(4) 0.076(5) 0.035(4) -0.005(4) 0.010(4) 
F14 0.105(5) 0.085(6) 0.075(5) 0.008(5) 0.008(4) 0.028(5) 
F15 0.113(6) 0.095(5) 0.085(5) 0.020(5) -0.020(5) -0.006(5) 
F16 0.103(4) 0.067(4) 0.070(3) -0.023(3) 0.000(3) 0.042(3) 
F17 0.069(3) 0.099(4) 0.101(4) -0.023(3) -0.003(3) 0.052(3) 
F18 0.080(4) 0.096(4) 0.111(4) -0.010(3) 0.034(3) 0.033(3) 
F107 0.075(4) 0.125(4) 0.090(4) 0.025(4) 0.011(3) 0.055(3) 
F108 0.043(3) 0.134(5) 0.091(4) -0.037(4) 0.026(3) 0.008(3) 
F109 0.056(3) 0.080(4) 0.070(3) -0.023(3) 0.022(2) 0.023(3) 
F110 0.062(6) 0.056(6) 0.053(4) -0.017(5) 0.000(5) -0.013(5) 
F111 0.057(5) 0.067(6) 0.052(6) -0.017(5) 0.005(5) -0.019(5) 
F112 0.066(6) 0.057(4) 0.054(6) -0.023(5) 0.010(5) -0.025(5) 
F113 0.100(5) 0.102(5) 0.084(4) 0.032(4) 0.012(4) 0.045(4) 
F114 0.106(4) 0.057(4) 0.071(4) 0.021(3) 0.006(3) 0.011(3) 
F115 0.068(4) 0.097(4) 0.044(3) 0.001(3) -0.009(3) 0.018(3) 
F116 0.089(5) 0.079(6) 0.080(5) -0.017(5) 0.001(4) 0.050(5) 
F117 0.071(5) 0.061(5) 0.090(5) -0.025(5) 0.005(5) 0.033(4) 
F118 0.085(5) 0.079(5) 0.096(6) -0.003(5) 0.011(5) 0.038(4) 

_refine_ls_extinction_method 
    'None'
_oxford_refine_ls_scale 0.14996(15) 
loop_
 _geom_bond_atom_site_label_1
 _geom_bond_site_symmetry_1
 _geom_bond_atom_site_label_2
 _geom_bond_site_symmetry_2
 _geom_bond_distance
 _geom_bond_publ_flag
Rh1 . C2 6_555 2.213(6)    yes
Rh1 . C1 6_555 2.208(5)    yes
Rh1 . P1 6_555 2.2717(12)    yes
Rh1 . P1 . 2.2717(12)    yes
Rh1 . C1 . 2.208(5)    yes
Rh1 . C2 . 2.213(6)    yes
P1 . C8 . 1.846(5)    yes
P1 . C13 . 1.82(3)    yes
P1 . C18 . 1.841(6)    yes
P1 . C8 . 1.846(5)    yes
P1 . C18 . 1.841(6)    yes
P1 . C113 . 1.838(10)    yes
C1 . C3 6_555 1.531(11)    yes
C1 . C2 . 1.347(12)    yes
C1 . H11 . 0.976    no
C2 . C3 . 1.545(10)    yes
C2 . H21 . 0.976    no
C3 . C7 . 1.516(12)    yes
C3 . H31 . 0.980    no
C7 . H71 6_555 0.971    no
C7 . H71 . 0.971    no
C8 . C9 . 1.533(7)    yes
C8 . C12 . 1.520(8)    yes
C8 . H81 . 0.973    no
C8 . C109 . 1.511(9)    yes
C8 . C112 . 1.524(9)    yes
C8 . H82 . 0.978    no
C9 . C10 . 1.537(8)    yes
C9 . H91 . 0.969    no
C9 . H92 . 0.970    no
C10 . C11 . 1.506(8)    yes
C10 . H102 . 0.967    no
C10 . H101 . 0.966    no
C11 . C12 . 1.505(8)    yes
C11 . H112 . 0.971    no
C11 . H111 . 0.968    no
C12 . H121 . 0.968    no
C12 . H122 . 0.969    no
C13 . C14 . 1.506(9)    yes
C13 . C17 . 1.506(9)    yes
C13 . H131 . 0.981    no
C14 . C15 . 1.515(9)    yes
C14 . H141 . 0.972    no
C14 . H142 . 0.976    no
C15 . C16 . 1.518(9)    yes
C15 . H152 . 0.971    no
C15 . H151 . 0.972    no
C16 . C17 . 1.503(9)    yes
C16 . H162 . 0.971    no
C16 . H161 . 0.971    no
C17 . H171 . 0.969    no
C17 . H172 . 0.971    no
C18 . C18 6_555 1.522(14)    yes
C18 . H182 . 0.957    no
C18 . H181 . 0.978    no
C109 . C110 . 1.509(9)    yes
C109 . H1091 . 0.971    no
C109 . H1092 . 0.972    no
C110 . C111 . 1.505(9)    yes
C110 . H1102 . 0.970    no
C110 . H1101 . 0.969    no
C111 . C112 . 1.514(10)    yes
C111 . H1112 . 0.967    no
C111 . H1111 . 0.971    no
C112 . H1121 . 0.971    no
C112 . H1122 . 0.969    no
C113 . C114 . 1.525(8)    yes
C113 . C117 . 1.534(7)    yes
C113 . H1131 . 0.982    no
C114 . C115 . 1.527(8)    yes
C114 . H1141 . 0.974    no
C114 . H1142 . 0.980    no
C115 . C116 . 1.510(8)    yes
C115 . H1152 . 0.972    no
C115 . H1151 . 0.970    no
C116 . C117 . 1.513(8)    yes
C116 . H1162 . 0.967    no
C116 . H1161 . 0.974    no
C117 . H1171 . 0.973    no
C117 . H1172 . 0.970    no
B1 . C46 6_555 1.641(6)    yes
B1 . C38 6_555 1.639(6)    yes
B1 . C38 . 1.639(6)    yes
B1 . C46 . 1.641(6)    yes
C38 . C39 . 1.407(6)    yes
C38 . C43 . 1.402(6)    yes
C39 . C40 . 1.385(6)    yes
C39 . H391 . 0.933    no
C40 . C41 . 1.369(7)    yes
C40 . C44 . 1.511(3)    yes
C41 . C42 . 1.385(7)    yes
C41 . H411 . 0.927    no
C42 . C43 . 1.387(6)    yes
C42 . C45 . 1.511(3)    yes
C43 . H431 . 0.927    no
C44 . F7 . 1.340(6)    yes
C44 . F8 . 1.323(6)    yes
C44 . F9 . 1.322(5)    yes
C44 . F107 . 1.320(5)    yes
C44 . F108 . 1.319(5)    yes
C44 . F109 . 1.322(5)    yes
C45 . F10 . 1.328(4)    yes
C45 . F11 . 1.331(4)    yes
C45 . F12 . 1.329(4)    yes
C45 . F110 . 1.327(6)    yes
C45 . F111 . 1.323(6)    yes
C45 . F112 . 1.330(6)    yes
C46 . C47 . 1.393(6)    yes
C46 . C51 . 1.395(6)    yes
C47 . C48 . 1.363(6)    yes
C47 . H471 . 0.940    no
C48 . C49 . 1.402(8)    yes
C48 . C52 . 1.512(4)    yes
C49 . C50 . 1.385(8)    yes
C49 . H491 . 0.925    no
C50 . C51 . 1.395(6)    yes
C50 . C53 . 1.511(4)    yes
C51 . H511 . 0.930    no
C52 . F13 . 1.331(5)    yes
C52 . F14 . 1.328(6)    yes
C52 . F15 . 1.316(6)    yes
C52 . F113 . 1.317(5)    yes
C52 . F114 . 1.338(5)    yes
C52 . F115 . 1.339(5)    yes
C53 . F16 . 1.332(5)    yes
C53 . F17 . 1.334(5)    yes
C53 . F18 . 1.321(5)    yes
C53 . F116 . 1.323(6)    yes
C53 . F117 . 1.333(6)    yes
C53 . F118 . 1.327(6)    yes
loop_
 _geom_angle_atom_site_label_1
 _geom_angle_site_symmetry_1
 _geom_angle_atom_site_label_2
 _geom_angle_site_symmetry_2
 _geom_angle_atom_site_label_3
 _geom_angle_site_symmetry_3
 _geom_angle
 _geom_angle_publ_flag
C2 6_555 Rh1 . C1 6_555 35.5(3)    yes
C2 6_555 Rh1 . P1 6_555 100.8(2)    yes
C1 6_555 Rh1 . P1 6_555 103.42(17)    yes
C2 6_555 Rh1 . P1 . 163.4(2)    yes
C1 6_555 Rh1 . P1 . 157.9(3)    yes
P1 6_555 Rh1 . P1 . 85.24(7)    yes
C2 6_555 Rh1 . C1 . 65.7(3)    yes
C1 6_555 Rh1 . C1 . 76.2(3)    yes
P1 6_555 Rh1 . C1 . 157.9(3)    yes
P1 . Rh1 . C1 . 103.42(17)    yes
C2 6_555 Rh1 . C2 . 77.7(4)    yes
C1 6_555 Rh1 . C2 . 65.7(3)    yes
P1 6_555 Rh1 . C2 . 163.4(2)    yes
P1 . Rh1 . C2 . 100.8(2)    yes
C1 . Rh1 . C2 . 35.5(3)    yes
Rh1 . P1 . C8 . 117.95(16)    yes
Rh1 . P1 . C13 . 108.1(9)    yes
C8 . P1 . C13 . 102.2(10)    yes
Rh1 . P1 . C18 . 109.24(19)    yes
C8 . P1 . C18 . 104.4(3)    yes
C13 . P1 . C18 . 115.1(13)    yes
Rh1 . P1 . C8 . 117.95(16)    yes
Rh1 . P1 . C18 . 109.24(19)    yes
C8 . P1 . C18 . 104.4(3)    yes
Rh1 . P1 . C113 . 115.9(5)    yes
C8 . P1 . C113 . 104.3(4)    yes
C18 . P1 . C113 . 103.5(6)    yes
C3 6_555 C1 . Rh1 . 96.1(4)    yes
C3 6_555 C1 . C2 . 107.6(7)    yes
Rh1 . C1 . C2 . 72.4(4)    yes
C3 6_555 C1 . H11 . 123.2    no
Rh1 . C1 . H11 . 121.2    no
C2 . C1 . H11 . 122.9    no
Rh1 . C2 . C1 . 72.1(4)    yes
Rh1 . C2 . C3 . 95.5(4)    yes
C1 . C2 . C3 . 104.6(8)    yes
Rh1 . C2 . H21 . 122.0    no
C1 . C2 . H21 . 124.8    no
C3 . C2 . H21 . 123.8    no
C2 . C3 . C1 6_555 102.5(5)    yes
C2 . C3 . C7 . 101.1(7)    yes
C1 6_555 C3 . C7 . 100.1(7)    yes
C2 . C3 . H31 . 118.0    no
C1 6_555 C3 . H31 . 116.0    no
C7 . C3 . H31 . 116.4    no
C3 6_555 C7 . C3 . 93.1(8)    yes
C3 6_555 C7 . H71 6_555 113.6    no
C3 . C7 . H71 6_555 113.5    no
C3 6_555 C7 . H71 . 113.5    no
C3 . C7 . H71 . 113.6    no
H71 6_555 C7 . H71 . 109.0    no
P1 . C8 . C9 . 111.1(5)    yes
P1 . C8 . C12 . 112.6(6)    yes
C9 . C8 . C12 . 104.7(5)    yes
P1 . C8 . H81 . 110.0    no
C9 . C8 . H81 . 109.7    no
C12 . C8 . H81 . 108.6    no
P1 . C8 . C109 . 119.9(8)    yes
P1 . C8 . C112 . 118.6(9)    yes
C109 . C8 . C112 . 105.0(7)    yes
P1 . C8 . H82 . 104.0    no
C109 . C8 . H82 . 104.1    no
C112 . C8 . H82 . 102.9    no
C8 . C9 . C10 . 102.7(5)    yes
C8 . C9 . H91 . 110.3    no
C10 . C9 . H91 . 111.8    no
C8 . C9 . H92 . 112.0    no
C10 . C9 . H92 . 110.8    no
H91 . C9 . H92 . 109.0    no
C9 . C10 . C11 . 103.8(5)    yes
C9 . C10 . H102 . 110.8    no
C11 . C10 . H102 . 110.3    no
C9 . C10 . H101 . 111.7    no
C11 . C10 . H101 . 110.1    no
H102 . C10 . H101 . 110.0    no
C10 . C11 . C12 . 106.3(5)    yes
C10 . C11 . H112 . 110.7    no
C12 . C11 . H112 . 110.5    no
C10 . C11 . H111 . 110.0    no
C12 . C11 . H111 . 109.5    no
H112 . C11 . H111 . 109.7    no
C8 . C12 . C11 . 107.6(5)    yes
C8 . C12 . H121 . 109.5    no
C11 . C12 . H121 . 109.6    no
C8 . C12 . H122 . 111.0    no
C11 . C12 . H122 . 110.1    no
H121 . C12 . H122 . 109.1    no
P1 . C13 . C14 . 116(2)    yes
P1 . C13 . C17 . 111.7(20)    yes
C14 . C13 . C17 . 107.2(6)    yes
P1 . C13 . H131 . 108.3    no
C14 . C13 . H131 . 107.0    no
C17 . C13 . H131 . 105.8    no
C13 . C14 . C15 . 105.5(7)    yes
C13 . C14 . H141 . 109.8    no
C15 . C14 . H141 . 111.5    no
C13 . C14 . H142 . 110.3    no
C15 . C14 . H142 . 110.0    no
H141 . C14 . H142 . 109.5    no
C14 . C15 . C16 . 104.8(7)    yes
C14 . C15 . H152 . 111.0    no
C16 . C15 . H152 . 111.3    no
C14 . C15 . H151 . 109.2    no
C16 . C15 . H151 . 111.0    no
H152 . C15 . H151 . 109.4    no
C15 . C16 . C17 . 105.8(7)    yes
C15 . C16 . H162 . 110.2    no
C17 . C16 . H162 . 113.5    no
C15 . C16 . H161 . 109.2    no
C17 . C16 . H161 . 108.2    no
H162 . C16 . H161 . 109.9    no
C13 . C17 . C16 . 107.5(6)    yes
C13 . C17 . H171 . 109.1    no
C16 . C17 . H171 . 106.4    no
C13 . C17 . H172 . 111.6    no
C16 . C17 . H172 . 112.6    no
H171 . C17 . H172 . 109.5    no
C18 6_555 C18 . P1 . 110.2(3)    yes
C18 6_555 C18 . H182 . 110.0    no
P1 . C18 . H182 . 109.8    no
C18 6_555 C18 . H181 . 108.8    no
P1 . C18 . H181 . 109.8    no
H182 . C18 . H181 . 108.2    no
C8 . C109 . C110 . 106.5(6)    yes
C8 . C109 . H1091 . 109.7    no
C110 . C109 . H1091 . 110.6    no
C8 . C109 . H1092 . 110.2    no
C110 . C109 . H1092 . 110.1    no
H1091 . C109 . H1092 . 109.6    no
C109 . C110 . C111 . 107.3(5)    yes
C109 . C110 . H1102 . 110.0    no
C111 . C110 . H1102 . 109.6    no
C109 . C110 . H1101 . 110.3    no
C111 . C110 . H1101 . 109.8    no
H1102 . C110 . H1101 . 109.8    no
C110 . C111 . C112 . 105.9(7)    yes
C110 . C111 . H1112 . 110.8    no
C112 . C111 . H1112 . 109.6    no
C110 . C111 . H1111 . 110.2    no
C112 . C111 . H1111 . 110.6    no
H1112 . C111 . H1111 . 109.6    no
C8 . C112 . C111 . 103.6(8)    yes
C8 . C112 . H1121 . 111.3    no
C111 . C112 . H1121 . 111.0    no
C8 . C112 . H1122 . 110.7    no
C111 . C112 . H1122 . 110.5    no
H1121 . C112 . H1122 . 109.5    no
P1 . C113 . C114 . 115.9(8)    yes
P1 . C113 . C117 . 116.8(7)    yes
C114 . C113 . C117 . 103.0(5)    yes
P1 . C113 . H1131 . 107.5    no
C114 . C113 . H1131 . 105.8    no
C117 . C113 . H1131 . 107.1    no
C113 . C114 . C115 . 102.7(6)    yes
C113 . C114 . H1141 . 110.4    no
C115 . C114 . H1141 . 111.4    no
C113 . C114 . H1142 . 110.8    no
C115 . C114 . H1142 . 112.3    no
H1141 . C114 . H1142 . 109.1    no
C114 . C115 . C116 . 105.8(5)    yes
C114 . C115 . H1152 . 109.7    no
C116 . C115 . H1152 . 111.6    no
C114 . C115 . H1151 . 109.6    no
C116 . C115 . H1151 . 110.8    no
H1152 . C115 . H1151 . 109.3    no
C115 . C116 . C117 . 107.2(4)    yes
C115 . C116 . H1162 . 110.1    no
C117 . C116 . H1162 . 110.2    no
C115 . C116 . H1161 . 109.6    no
C117 . C116 . H1161 . 109.8    no
H1162 . C116 . H1161 . 109.9    no
C113 . C117 . C116 . 105.1(5)    yes
C113 . C117 . H1171 . 109.9    no
C116 . C117 . H1171 . 110.1    no
C113 . C117 . H1172 . 111.9    no
C116 . C117 . H1172 . 110.3    no
H1171 . C117 . H1172 . 109.5    no
C46 6_555 B1 . C38 6_555 111.6(2)    yes
C46 6_555 B1 . C38 . 112.7(2)    yes
C38 6_555 B1 . C38 . 104.3(5)    yes
C46 6_555 B1 . C46 . 104.2(5)    yes
C38 6_555 B1 . C46 . 112.7(2)    yes
C38 . B1 . C46 . 111.6(2)    yes
B1 . C38 . C39 . 122.0(3)    yes
B1 . C38 . C43 . 122.6(3)    yes
C39 . C38 . C43 . 115.2(4)    yes
C38 . C39 . C40 . 122.1(4)    yes
C38 . C39 . H391 . 118.8    no
C40 . C39 . H391 . 119.0    no
C39 . C40 . C41 . 121.4(4)    yes
C39 . C40 . C44 . 120.6(3)    yes
C41 . C40 . C44 . 117.8(3)    yes
C40 . C41 . C42 . 118.1(4)    yes
C40 . C41 . H411 . 121.3    no
C42 . C41 . H411 . 120.6    no
C41 . C42 . C43 . 120.9(4)    yes
C41 . C42 . C45 . 118.6(3)    yes
C43 . C42 . C45 . 120.4(3)    yes
C38 . C43 . C42 . 122.3(4)    yes
C38 . C43 . H431 . 119.2    no
C42 . C43 . H431 . 118.6    no
C40 . C44 . F7 . 111.92(5)    yes
C40 . C44 . F8 . 112.00(5)    yes
F7 . C44 . F8 . 106.84(5)    yes
C40 . C44 . F9 . 111.99(5)    yes
F7 . C44 . F9 . 106.84(5)    yes
F8 . C44 . F9 . 106.89(5)    yes
C40 . C44 . F107 . 111.97(5)    yes
C40 . C44 . F108 . 111.92(5)    yes
F107 . C44 . F108 . 106.88(5)    yes
C40 . C44 . F109 . 111.99(5)    yes
F107 . C44 . F109 . 106.91(5)    yes
F108 . C44 . F109 . 106.81(5)    yes
C42 . C45 . F10 . 111.98(5)    yes
C42 . C45 . F11 . 111.96(5)    yes
F10 . C45 . F11 . 106.85(5)    yes
C42 . C45 . F12 . 111.97(5)    yes
F10 . C45 . F12 . 106.88(5)    yes
F11 . C45 . F12 . 106.86(5)    yes
C42 . C45 . F110 . 111.97(5)    yes
C42 . C45 . F111 . 111.98(5)    yes
F110 . C45 . F111 . 106.88(5)    yes
C42 . C45 . F112 . 111.95(5)    yes
F110 . C45 . F112 . 106.86(5)    yes
F111 . C45 . F112 . 106.87(5)    yes
B1 . C46 . C47 . 121.3(4)    yes
B1 . C46 . C51 . 122.6(3)    yes
C47 . C46 . C51 . 115.8(4)    yes
C46 . C47 . C48 . 123.7(5)    yes
C46 . C47 . H471 . 118.7    no
C48 . C47 . H471 . 117.6    no
C47 . C48 . C49 . 119.9(4)    yes
C47 . C48 . C52 . 118.5(4)    yes
C49 . C48 . C52 . 121.6(4)    yes
C48 . C49 . C50 . 118.0(4)    yes
C48 . C49 . H491 . 121.0    no
C50 . C49 . H491 . 121.0    no
C49 . C50 . C51 . 120.8(4)    yes
C49 . C50 . C53 . 121.4(3)    yes
C51 . C50 . C53 . 117.8(3)    yes
C46 . C51 . C50 . 121.6(4)    yes
C46 . C51 . H511 . 119.8    no
C50 . C51 . H511 . 118.6    no
C48 . C52 . F13 . 111.90(5)    yes
C48 . C52 . F14 . 112.01(5)    yes
F13 . C52 . F14 . 106.85(5)    yes
C48 . C52 . F15 . 111.97(5)    yes
F13 . C52 . F15 . 106.86(5)    yes
F14 . C52 . F15 . 106.90(5)    yes
C48 . C52 . F113 . 112.00(5)    yes
C48 . C52 . F114 . 111.98(5)    yes
F113 . C52 . F114 . 106.89(5)    yes
C48 . C52 . F115 . 111.90(5)    yes
F113 . C52 . F115 . 106.92(5)    yes
F114 . C52 . F115 . 106.81(5)    yes
C50 . C53 . F16 . 111.95(5)    yes
C50 . C53 . F17 . 111.99(5)    yes
F16 . C53 . F17 . 106.87(5)    yes
C50 . C53 . F18 . 111.95(5)    yes
F16 . C53 . F18 . 106.83(5)    yes
F17 . C53 . F18 . 106.90(5)    yes
C50 . C53 . F116 . 111.99(5)    yes
C50 . C53 . F117 . 111.96(5)    yes
F116 . C53 . F117 . 106.87(5)    yes
C50 . C53 . F118 . 111.95(5)    yes
F116 . C53 . F118 . 106.88(5)    yes
F117 . C53 . F118 . 106.85(5)    yes


_iucr_refine_instructions_details
;
#
# Punched on 01/08/16 at 18:09:16
#
#LIST     12                                                                    
BLOCK SCALE X'S  U'S 
EQUIV PART(1001, OCC) PART(1002, OCC) 
WEIGHT -1   PART(1002, OCC) 
EQUIV PART(2001, OCC) PART(2002, OCC) 
WEIGHT -1   PART(2002, OCC) 
EQUIV PART(3001, OCC) PART(3002, OCC) 
WEIGHT -1   PART(3002, OCC) 
EQUIV PART(4001, OCC) PART(4002, OCC) 
WEIGHT -1   PART(4002, OCC) 
EQUIV PART(5001, OCC) PART(5002, OCC) 
WEIGHT -1   PART(5002, OCC) 
EQUIV PART(6001, OCC) PART(6002, OCC) 
WEIGHT -1   PART(6002, OCC) 
RIDE C   (   1,X'S) H   (  11,X'S) 
RIDE C   (   2,X'S) H   (  21,X'S) 
RIDE C   (   3,X'S) H   (  31,X'S) 
RIDE C   (   7,X'S) H   (  71,X'S) 
RIDE C   (   8,X'S) H   (  81,X'S) 
CONT H   (  82,X'S) 
RIDE C   (   9,X'S) H   (  91,X'S) H   (  92,X'S) 
RIDE C   (  10,X'S) H   ( 102,X'S) H   ( 101,X'S) 
RIDE C   (  11,X'S) H   ( 112,X'S) H   ( 111,X'S) 
RIDE C   (  12,X'S) H   ( 121,X'S) H   ( 122,X'S) 
RIDE C   (  13,X'S) H   ( 131,X'S) 
RIDE C   (  14,X'S) H   ( 141,X'S) H   ( 142,X'S) 
RIDE C   (  15,X'S) H   ( 152,X'S) H   ( 151,X'S) 
RIDE C   (  16,X'S) H   ( 162,X'S) H   ( 161,X'S) 
RIDE C   (  17,X'S) H   ( 171,X'S) H   ( 172,X'S) 
RIDE C   (  18,X'S) H   ( 182,X'S) H   ( 181,X'S) 
RIDE C   ( 109,X'S) H   (1091,X'S) H   (1092,X'S) 
RIDE C   ( 110,X'S) H   (1102,X'S) H   (1101,X'S) 
RIDE C   ( 111,X'S) H   (1112,X'S) H   (1111,X'S) 
RIDE C   ( 112,X'S) H   (1121,X'S) H   (1122,X'S) 
RIDE C   ( 113,X'S) H   (1131,X'S) 
RIDE C   ( 114,X'S) H   (1141,X'S) H   (1142,X'S) 
RIDE C   ( 115,X'S) H   (1152,X'S) H   (1151,X'S) 
RIDE C   ( 116,X'S) H   (1162,X'S) H   (1161,X'S) 
RIDE C   ( 117,X'S) H   (1171,X'S) H   (1172,X'S) 
RIDE C   (  39,X'S) H   ( 391,X'S) 
RIDE C   (  41,X'S) H   ( 411,X'S) 
RIDE C   (  43,X'S) H   ( 431,X'S) 
RIDE C   (  47,X'S) H   ( 471,X'S) 
RIDE C   (  49,X'S) H   ( 491,X'S) 
RIDE C   (  51,X'S) H   ( 511,X'S) 
END                                                                             
#
# Punched on 01/08/16 at 18:09:16
#
#LIST     16                                                                    
DIST 0,0.01 = MEAN 
CONT C(8) TO C(9) C(9) TO C(10) C(10) TO C(11) 
CONT C(11) TO C(12) C(12) TO C(8) 
CONT C(8) TO C(109) C(109) TO C(110) C(110) TO C(111) 
CONT C(111) TO C(112) C(112) TO C(8) 
CONT C(13) TO C(14) C(14) TO C(15) C(15) TO C(16) 
CONT C(16) TO C(17) C(17) TO C(13) 
CONT C(113) TO C(114) C(114) TO C(115) C(115) TO C(116) 
CONT C(116) TO C(117) C(117) TO C(113) 
DIST 0,0.01 = MEAN 
CONT C(8) TO C(10) C(9) TO C(11) C(10) TO C(12) 
CONT C(11) TO C(8) C(12) TO C(9) 
CONT C(8) TO C(110) C(109) TO C(111) C(110) TO C(112) 
CONT C(111) TO C(8) C(112) TO C(109) 
CONT C(13) TO C(15) C(14) TO C(16) C(15) TO C(17) 
CONT C(16) TO C(13) C(17) TO C(14) 
CONT C(113) TO C(115) C(114) TO C(116) C(115) TO C(117) 
CONT C(116) TO C(113) C(117) TO C(114) 
VIBR .0, 0.00100 = P(1) TO C(13) 
VIBR .0, 0.00200 = C(8) TO RH(1) 
VIBR .0, 0.00200 = C(13) TO RH(1) 
VIBR .0, 0.00200 = C(13) TO C(8) 
VIBR .0, 0.00200 = C(18) TO RH(1) 
VIBR .0, 0.00200 = C(18) TO C(8) 
VIBR .0, 0.00200 = C(18) TO C(13) 
VIBR .0, 0.00100 = P(1) TO C(8) 
VIBR .0, 0.00100 = P(1) TO C(113) 
VIBR .0, 0.00200 = C(8) TO RH(1) 
VIBR .0, 0.00200 = C(18) TO RH(1) 
VIBR .0, 0.00200 = C(18) TO C(8) 
VIBR .0, 0.00200 = C(113) TO RH(1) 
VIBR .0, 0.00200 = C(113) TO C(8) 
VIBR .0, 0.00200 = C(113) TO C(18) 
VIBR .0, 0.00100 = C(8) TO C(9) 
VIBR .0, 0.00100 = C(8) TO C(12) 
VIBR .0, 0.00200 = C(9) TO P(1) 
VIBR .0, 0.00200 = C(12) TO P(1) 
VIBR .0, 0.00200 = C(12) TO C(9) 
VIBR .0, 0.00100 = C(8) TO C(109) 
VIBR .0, 0.00100 = C(8) TO C(112) 
VIBR .0, 0.00200 = C(109) TO P(1) 
VIBR .0, 0.00200 = C(112) TO P(1) 
VIBR .0, 0.00200 = C(112) TO C(109) 
VIBR .0, 0.00100 = C(9) TO C(10) 
VIBR .0, 0.00200 = C(10) TO C(8) 
VIBR .0, 0.00100 = C(10) TO C(11) 
VIBR .0, 0.00200 = C(11) TO C(9) 
VIBR .0, 0.00100 = C(11) TO C(12) 
VIBR .0, 0.00200 = C(12) TO C(10) 
VIBR .0, 0.00200 = C(11) TO C(8) 
VIBR .0, 0.00100 = C(13) TO C(14) 
VIBR .0, 0.00100 = C(13) TO C(17) 
VIBR .0, 0.00200 = C(14) TO P(1) 
VIBR .0, 0.00200 = C(17) TO P(1) 
VIBR .0, 0.00200 = C(17) TO C(14) 
VIBR .0, 0.00100 = C(14) TO C(15) 
VIBR .0, 0.00200 = C(15) TO C(13) 
VIBR .0, 0.00100 = C(15) TO C(16) 
VIBR .0, 0.00200 = C(16) TO C(14) 
VIBR .0, 0.00100 = C(16) TO C(17) 
VIBR .0, 0.00200 = C(17) TO C(15) 
VIBR .0, 0.00200 = C(13) TO C(16) 
VIBR .0, 0.00100 = C(109) TO C(110) 
VIBR .0, 0.00200 = C(110) TO C(8) 
VIBR .0, 0.00100 = C(110) TO C(111) 
VIBR .0, 0.00200 = C(111) TO C(109) 
VIBR .0, 0.00100 = C(111) TO C(112) 
VIBR .0, 0.00200 = C(112) TO C(110) 
VIBR .0, 0.00200 = C(111) TO C(8) 
VIBR .0, 0.00100 = C(113) TO C(114) 
VIBR .0, 0.00100 = C(113) TO C(117) 
VIBR .0, 0.00200 = C(114) TO P(1) 
VIBR .0, 0.00200 = C(117) TO P(1) 
VIBR .0, 0.00200 = C(117) TO C(114) 
VIBR .0, 0.00100 = C(114) TO C(115) 
VIBR .0, 0.00200 = C(115) TO C(113) 
VIBR .0, 0.00100 = C(115) TO C(116) 
VIBR .0, 0.00200 = C(116) TO C(114) 
VIBR .0, 0.00100 = C(116) TO C(117) 
VIBR .0, 0.00200 = C(117) TO C(115) 
VIBR .0, 0.00200 = C(113) TO C(116) 
U(IJ) .0, 0.02000 = P(1) TO C(8) 
U(IJ) .0, 0.02000 = P(1) TO C(13) 
U(IJ) .0, 0.02000 = P(1) TO C(113) 
U(IJ) .0, 0.02000 = C(8) TO C(9) 
U(IJ) .0, 0.02000 = C(8) TO C(12) 
U(IJ) .0, 0.02000 = C(8) TO C(109) 
U(IJ) .0, 0.02000 = C(8) TO C(112) 
U(IJ) .0, 0.02000 = C(9) TO C(10) 
U(IJ) .0, 0.02000 = C(10) TO C(11) 
U(IJ) .0, 0.02000 = C(11) TO C(12) 
U(IJ) .0, 0.02000 = C(13) TO C(14) 
U(IJ) .0, 0.02000 = C(13) TO C(17) 
U(IJ) .0, 0.02000 = C(14) TO C(15) 
U(IJ) .0, 0.02000 = C(15) TO C(16) 
U(IJ) .0, 0.02000 = C(16) TO C(17) 
U(IJ) .0, 0.02000 = C(109) TO C(110) 
U(IJ) .0, 0.02000 = C(110) TO C(111) 
U(IJ) .0, 0.02000 = C(111) TO C(112) 
U(IJ) .0, 0.02000 = C(113) TO C(114) 
U(IJ) .0, 0.02000 = C(113) TO C(117) 
U(IJ) .0, 0.02000 = C(114) TO C(115) 
U(IJ) .0, 0.02000 = C(115) TO C(116) 
U(IJ) .0, 0.02000 = C(116) TO C(117) 
SAME C(40) C(44) F(7) F(8) F(9) AND 
CONT C(40) C(44) F(8) F(9) F(7) AND 
CONT C(40) C(44) F(9) F(7) F(8) AND 
CONT C(42) C(45) F(10) F(11) F(12) AND 
CONT C(42) C(45) F(11) F(12) F(10) AND 
CONT C(42) C(45) F(12) F(10) F(11) AND 
CONT C(48) C(52) F(13) F(14) F(15) AND 
CONT C(48) C(52) F(14) F(15) F(13) AND 
CONT C(48) C(52) F(15) F(13) F(14) AND 
CONT C(50) C(53) F(16) F(17) F(18) AND 
CONT C(50) C(53) F(17) F(18) F(16) AND 
CONT C(50) C(53) F(18) F(16) F(17) AND 
CONT C(40) C(44) F(107) F(108) F(109) AND 
CONT C(40) C(44) F(108) F(109) F(107) AND 
CONT C(40) C(44) F(109) F(107) F(108) AND 
CONT C(42) C(45) F(110) F(111) F(112) AND 
CONT C(42) C(45) F(111) F(112) F(110) AND 
CONT C(42) C(45) F(112) F(110) F(111) AND 
CONT C(48) C(52) F(113) F(114) F(115) AND 
CONT C(48) C(52) F(114) F(115) F(113) AND 
CONT C(48) C(52) F(115) F(113) F(114) AND 
CONT C(50) C(53) F(116) F(117) F(118) AND 
CONT C(50) C(53) F(117) F(118) F(116) AND 
CONT C(50) C(53) F(118) F(116) F(117) 
SIMU 0.01 C(40) C(44) F(7) F(8) F(9) AND 
CONT C(40) C(44) F(8) F(9) F(7) AND 
CONT C(40) C(44) F(9) F(7) F(8) AND 
CONT C(42) C(45) F(10) F(11) F(12) AND 
CONT C(42) C(45) F(11) F(12) F(10) AND 
CONT C(42) C(45) F(12) F(10) F(11) AND 
CONT C(48) C(52) F(13) F(14) F(15) AND 
CONT C(48) C(52) F(14) F(15) F(13) AND 
CONT C(48) C(52) F(15) F(13) F(14) AND 
CONT C(50) C(53) F(16) F(17) F(18) AND 
CONT C(50) C(53) F(17) F(18) F(16) AND 
CONT C(50) C(53) F(18) F(16) F(17) AND 
CONT C(40) C(44) F(107) F(108) F(109) AND 
CONT C(40) C(44) F(108) F(109) F(107) AND 
CONT C(40) C(44) F(109) F(107) F(108) AND 
CONT C(42) C(45) F(110) F(111) F(112) AND 
CONT C(42) C(45) F(111) F(112) F(110) AND 
CONT C(42) C(45) F(112) F(110) F(111) AND 
CONT C(48) C(52) F(113) F(114) F(115) AND 
CONT C(48) C(52) F(114) F(115) F(113) AND 
CONT C(48) C(52) F(115) F(113) F(114) AND 
CONT C(50) C(53) F(116) F(117) F(118) AND 
CONT C(50) C(53) F(117) F(118) F(116) AND 
CONT C(50) C(53) F(118) F(116) F(117) 
DELU 0.01 C(40) C(44) F(7) F(8) F(9) AND 
CONT C(40) C(44) F(8) F(9) F(7) AND 
CONT C(40) C(44) F(9) F(7) F(8) AND 
CONT C(42) C(45) F(10) F(11) F(12) AND 
CONT C(42) C(45) F(11) F(12) F(10) AND 
CONT C(42) C(45) F(12) F(10) F(11) AND 
CONT C(48) C(52) F(13) F(14) F(15) AND 
CONT C(48) C(52) F(14) F(15) F(13) AND 
CONT C(48) C(52) F(15) F(13) F(14) AND 
CONT C(50) C(53) F(16) F(17) F(18) AND 
CONT C(50) C(53) F(17) F(18) F(16) AND 
CONT C(50) C(53) F(18) F(16) F(17) AND 
CONT C(40) C(44) F(107) F(108) F(109) AND 
CONT C(40) C(44) F(108) F(109) F(107) AND 
CONT C(40) C(44) F(109) F(107) F(108) AND 
CONT C(42) C(45) F(110) F(111) F(112) AND 
CONT C(42) C(45) F(111) F(112) F(110) AND 
CONT C(42) C(45) F(112) F(110) F(111) AND 
CONT C(48) C(52) F(113) F(114) F(115) AND 
CONT C(48) C(52) F(114) F(115) F(113) AND 
CONT C(48) C(52) F(115) F(113) F(114) AND 
CONT C(50) C(53) F(116) F(117) F(118) AND 
CONT C(50) C(53) F(117) F(118) F(116) AND 
CONT C(50) C(53) F(118) F(116) F(117) 
REM   HREST   START (DO NOT REMOVE THIS LINE) 
REM   HREST   END (DO NOT REMOVE THIS LINE) 
END                                                                             
;


#==============================================================================
data_3-NBA
#==============================================================================
_audit_creation_date        "2016-08-01"
_audit_creation_method CRYSTALS_ver_14.61_build_6019 

_oxford_structure_analysis_title  '6610 (056am16)'
_chemical_name_systematic         .
_chemical_melting_point           'not measured'

_cell_length_a                    19.0911(3)
_cell_length_b                    17.5973(3)
_cell_length_c                    18.2354(3)
_cell_angle_alpha                 90
_cell_angle_beta                  90.3202(15)
_cell_angle_gamma                 90
_cell_volume                      6126.12(17)
 
_symmetry_cell_setting            'monoclinic' 
_symmetry_space_group_name_H-M    'P 1 21/c 1 ' 
_symmetry_space_group_name_Hall   '-P 2ybc' 
loop_
 _symmetry_equiv_pos_as_xyz
 'x,y,z'
 '-x,-y,-z'
 '-x,y+1/2,-z+1/2'
 'x,-y+1/2,z+1/2'

loop_
_atom_type_symbol
_atom_type_scat_dispersion_real
_atom_type_scat_dispersion_imag
_atom_type_scat_Cromer_Mann_a1
_atom_type_scat_Cromer_Mann_b1
_atom_type_scat_Cromer_Mann_a2
_atom_type_scat_Cromer_Mann_b2
_atom_type_scat_Cromer_Mann_a3
_atom_type_scat_Cromer_Mann_b3
_atom_type_scat_Cromer_Mann_a4
_atom_type_scat_Cromer_Mann_b4
_atom_type_scat_Cromer_Mann_c
_atom_type_scat_source  
 C       0.0181   0.0091   2.3100  20.8439   1.0200  10.2075   1.5886   0.5687
   0.8650  51.6512   0.2156 'International Tables Vol C 4.2.6.8 and 6.1.1.4'
 H       0.0000   0.0000   0.4930  10.5109   0.3229  26.1257   0.1402   3.1424
   0.0408  57.7998   0.0030 'International Tables Vol C 4.2.6.8 and 6.1.1.4'
 N       0.0311   0.0180  12.2126   0.0057   3.1322   9.8933   2.0125  28.9975
   1.1663   0.5826 -11.5290 'International Tables Vol C 4.2.6.8 and 6.1.1.4'
 O       0.0492   0.0322   3.0485  13.2771   2.2868   5.7011   1.5463   0.3239
   0.8670  32.9089   0.2508 'International Tables Vol C 4.2.6.8 and 6.1.1.4'
 F       0.0727   0.0534   3.5392  10.2825   2.6412   4.2944   1.5170   0.2615
   1.0243  26.1476   0.2776 'International Tables Vol C 4.2.6.8 and 6.1.1.4'
 B       0.0090   0.0039   2.0545  23.2185   1.3326   1.0210   1.0979  60.3498
   0.7068   0.1403  -0.1932 'International Tables Vol C 4.2.6.8 and 6.1.1.4'
 P       0.2955   0.4335   6.4345   1.9067   4.1791  27.1570   1.7800   0.5260
   1.4908  68.1645   1.1149 'International Tables Vol C 4.2.6.8 and 6.1.1.4'
 Rh      0.0927   3.6045  19.2957   0.7515  14.3501   8.2176   4.7343  25.8749
   1.2892  98.6062   5.3280 'International Tables Vol C 4.2.6.8 and 6.1.1.4'
 
 
_cell_formula_units_Z                    4

# Given Formula = C74.25 H67.50 B1 F1 N6.75 O6.75 P1 Rh1 
# Dc =      1.44 Fooo =   2753.00 Mu =     30.47 M =   1326.08
# Found Formula = C61 H64 B1 F24.00 P2 Rh1 
# Dc =      1.55 FOOO =   2904.00 Mu =     37.60 M =   1428.79

_chemical_formula_sum             'C61 H64 B1 F24 P2 Rh1'
_chemical_formula_moiety          'C29 H52 P2 Rh1, C32 H12 B F24'
_chemical_compound_source                .
_chemical_formula_weight           1428.79
 
 
_cell_measurement_reflns_used        23692
_cell_measurement_theta_min              3
_cell_measurement_theta_max             76
_cell_measurement_temperature          100
 
_exptl_crystal_description        'block' 
_exptl_crystal_colour             'clear_intense_orange' 
_exptl_crystal_size_min           0.07 
_exptl_crystal_size_mid           0.14 
_exptl_crystal_size_max           0.20 
 
_exptl_crystal_density_diffrn     1.549 
_exptl_crystal_density_meas       'not measured' 
_exptl_crystal_density_method     'not measured' 
# Non-dispersive F(000): 
_exptl_crystal_F_000              2904.000 
_exptl_absorpt_coefficient_mu     3.760 
 
# Sheldrick geometric approximatio 0.59 0.77 
_exptl_absorpt_correction_type    multi-scan 
_exptl_absorpt_process_details    'CrysAlisPro, (Agilent, 2011)' 
_exptl_absorpt_correction_T_min   0.56 
_exptl_absorpt_correction_T_max   0.77 
_diffrn_measurement_device_type   'Oxford Diffraction SuperNova' 
_diffrn_measurement_device        'Area' 
_diffrn_radiation_monochromator   'graphite' 
_diffrn_radiation_type            'Cu K\a'
_diffrn_radiation_wavelength           1.5418
_diffrn_measurement_method        \w 
 
# If a reference occurs more than once, delete the author 
# and date from subsequent references. 
_computing_data_collection        'SuperNova, (Oxford Diffraction, 2010)' 
_computing_cell_refinement        'CrysAlisPro, (Agilent, 2011)' 
_computing_data_reduction         'CrysAlisPro, (Agilent, 2011)' 
_computing_structure_solution     'SHELXT (Sheldrick, 2015)' 
_computing_structure_refinement   'CRYSTALS (Betteridge et al., 2003)' 
_computing_publication_material   'CRYSTALS (Betteridge et al., 2003)' 
_computing_molecular_graphics     'CAMERON (Watkin et al., 1996)' 
 
_diffrn_standards_interval_time   . 
_diffrn_standards_interval_count  . 
_diffrn_standards_number          0 
_diffrn_standards_decay_%         . 
 
_diffrn_ambient_temperature        100
_diffrn_reflns_number             73320 
_reflns_number_total              12721 
_diffrn_reflns_av_R_equivalents   0.068 
# Number of reflections with Friedels Law is 12721 
# Theoretical number of reflections is about 25628 
 
 
_diffrn_reflns_theta_min          3.490 
_diffrn_reflns_theta_max          76.133 
_diffrn_measured_fraction_theta_max 0.994 
 
_diffrn_reflns_theta_full         74.611 
_diffrn_measured_fraction_theta_full 0.998 
 
 
_diffrn_reflns_limit_h_min        -23 
_diffrn_reflns_limit_h_max        23 
_diffrn_reflns_limit_k_min        -22 
_diffrn_reflns_limit_k_max        14 
_diffrn_reflns_limit_l_min        -22 
_diffrn_reflns_limit_l_max        22 
_reflns_limit_h_min               -23 
_reflns_limit_h_max               23 
_reflns_limit_k_min               0 
_reflns_limit_k_max               22 
_reflns_limit_l_min               0 
_reflns_limit_l_max               22 
 
_oxford_diffrn_Wilson_B_factor    1.83 
_oxford_diffrn_Wilson_scale       0.44 
 
_atom_sites_solution_primary      direct #heavy,direct,difmap,geom,iterative
# _atom_sites_solution_secondary  difmap
_atom_sites_solution_hydrogens    difmap
 
_refine_diff_density_min          -1.13 
_refine_diff_density_max          2.37 
 
 
# The current dictionary definitions do not cover the 
# situation where the reflections used for refinement were 
# selected by a user-defined sigma threshold 
 
 
# The values actually used during refinement 
_oxford_reflns_threshold_expression_ref     I>-3.0\s(I)
_refine_ls_number_reflns          12716 
_refine_ls_number_restraints      1298 
_refine_ls_number_parameters      989 
_oxford_refine_ls_R_factor_ref    0.0785 
_refine_ls_wR_factor_ref          0.1927 
_refine_ls_goodness_of_fit_ref    1.0212 
_refine_ls_shift/su_max           0.0015367 
_refine_ls_shift/su_mean          0.0000373 
 
 
# The values computed with all filters except I/sigma 
_oxford_reflns_number_all         12721 
_refine_ls_R_factor_all           0.0786 
_refine_ls_wR_factor_all          0.1929 
 
# The values computed with a 2 sigma cutoff - a la SHELX 
_reflns_threshold_expression      I>2.0\s(I)
_reflns_number_gt                 10901 
_refine_ls_R_factor_gt            0.0695 
_refine_ls_wR_factor_gt           0.1838 
 
# choose from: rm (reference molecule of known chirality), 
# ad (anomolous dispersion - Flack), rmad (rm and ad), 
# syn (from synthesis), unk (unknown) or . (not applicable). 
_chemical_absolute_configuration  '.' 
 
 
_refine_ls_structure_factor_coef  Fsqd 
_refine_ls_matrix_type            full
_refine_ls_hydrogen_treatment     constr         #undef, noref, refall,
                                                 # refxyz, refU, constr or mixed
_refine_ls_weighting_scheme       calc 
_refine_ls_weighting_details 
;
 Method= Modified Sheldrick 
 w=1/[\s^2^(F^2^) + ( 0.09P)^2^ +33.91P] 
 ,where P=(max(Fo^2^,0) + 2Fc^2^)/3 
;
# Insert your own references if required - in alphabetical order 
_publ_section_references 
; 
Betteridge, P.W., Carruthers, J.R., Cooper, R.I., 
Prout, K. & Watkin, D.J. (2003). J. Appl. Cryst. 36, 1487. 
 
Agilent (2011). CrysAlisPro. 
 
Oxford Diffraction, (2010). Supernova User Manual. 
 
Sheldrick, G.M. (2015). Acta Cryst. A71, 3-8. 
 
Watkin, D.J., Prout, C.K. & Pearce, L.J. (1996). CAMERON, Chemical 
Crystallography Laboratory, Oxford, UK. 
; 

# Uequiv = arithmetic mean of Ui i.e. Ueqiv = (U1+U2+U3)/3

# Replace last . with number of unfound hydrogen atoms attached to an atom.

# ..._refinement_flags_... 
# . no refinement constraints           S special position constraint on site
# G rigid group refinement of site      R riding atom
# D distance or angle restraint on site T thermal displacement constraints
# U Uiso or Uij restraint (rigid bond)  P partial occupancy constraint


loop_
_atom_site_label
_atom_site_type_symbol
_atom_site_fract_x
_atom_site_fract_y
_atom_site_fract_z
_atom_site_U_iso_or_equiv
_atom_site_occupancy
_atom_site_adp_type
_atom_site_refinement_flags_posn
_atom_site_refinement_flags_adp
_atom_site_refinement_flags_occupancy
_atom_site_disorder_assembly
_atom_site_disorder_group
_atom_site_attached_hydrogens
Rh1 Rh 0.743018(16) 0.513347(19) 0.741513(17) 0.0201 1.0000 Uani . . . . . . 
P1 P 0.66929(5) 0.42213(6) 0.77165(6) 0.0204 1.0000 Uani . . . . . . 
P2 P 0.81909(5) 0.42018(6) 0.72759(6) 0.0190 1.0000 Uani . . . . . . 
C1 C 0.7013(3) 0.6410(3) 0.7328(3) 0.0294 1.0000 Uani . . . . . . 
C2 C 0.7785(3) 0.6386(3) 0.7068(3) 0.0303 1.0000 Uani . . . . . . 
C3 C 0.8142(3) 0.7017(3) 0.7537(3) 0.0363 1.0000 Uani . . . . . . 
C4 C 0.8198(3) 0.6732(3) 0.8327(3) 0.0405 1.0000 Uani . . . . . . 
C5 C 0.7434(3) 0.6751(3) 0.8593(3) 0.0399 1.0000 Uani . . . . . . 
C6 C 0.7028(3) 0.7046(3) 0.7923(3) 0.0359 1.0000 Uani . . . . . . 
C7 C 0.7547(3) 0.7616(3) 0.7595(3) 0.0394 1.0000 Uani . . . . . . 
C8 C 0.6437(2) 0.4147(3) 0.86883(19) 0.0268 0.50(7) Uani D . P 1 1 . 
C9 C 0.7048(5) 0.3863(16) 0.9182(7) 0.0315 0.50(7) Uani D . P 1 1 . 
C10 C 0.6827(11) 0.4090(17) 0.9970(5) 0.0345 0.50(7) Uani D . P 1 1 . 
C11 C 0.6176(14) 0.4555(12) 0.9901(6) 0.0385 0.50(7) Uani D . P 1 1 . 
C12 C 0.6165(13) 0.4845(6) 0.9101(9) 0.0280 0.50(7) Uani D . P 1 1 . 
C13 C 0.5855(2) 0.4220(3) 0.7210(3) 0.0256 1.0000 Uani . . . . . . 
C14 C 0.5375(3) 0.4913(3) 0.7337(2) 0.0354 1.0000 Uani D . . . . . 
C15 C 0.4815(2) 0.4756(7) 0.6740(4) 0.0299 0.509(19) Uani D . P 2 1 . 
C16 C 0.5241(3) 0.4496(4) 0.6075(2) 0.0429 1.0000 Uani D . . . . . 
C17 C 0.5945(3) 0.4208(3) 0.6373(3) 0.0307 1.0000 Uani . . . . . . 
C18 C 0.7056(2) 0.3269(3) 0.7518(3) 0.0242 1.0000 Uani . . . . . . 
C19 C 0.7846(2) 0.3283(3) 0.7615(2) 0.0233 1.0000 Uani . . . . . . 
C20 C 0.8441(2) 0.4010(3) 0.6323(2) 0.0217 1.0000 Uani . . . . . . 
C21 C 0.7858(2) 0.3618(3) 0.5872(3) 0.0278 1.0000 Uani . . . . . . 
C22 C 0.8018(3) 0.3812(3) 0.5062(3) 0.0355 1.0000 Uani . . . . . . 
C23 C 0.8649(3) 0.4348(3) 0.5083(3) 0.0335 1.0000 Uani . . . . . . 
C24 C 0.8628(3) 0.4699(3) 0.5846(3) 0.0294 1.0000 Uani . . . . . . 
C25 C 0.9031(2) 0.4282(3) 0.7770(2) 0.0229 1.0000 Uani . . . . . . 
C26 C 0.9529(2) 0.4912(3) 0.7516(3) 0.0278 1.0000 Uani . . . . . . 
C27 C 1.0074(3) 0.4906(3) 0.8133(3) 0.0348 1.0000 Uani . . . . . . 
C28 C 0.9636(3) 0.4832(4) 0.8834(3) 0.0376 1.0000 Uani . . . . . . 
C29 C 0.8955(2) 0.4426(3) 0.8601(3) 0.0280 1.0000 Uani . . . . . . 
C108 C 0.6437(2) 0.4147(3) 0.86883(19) 0.0268 0.50(7) Uani D . P 1 2 . 
C109 C 0.7054(5) 0.4070(19) 0.9228(6) 0.0367 0.50(7) Uani D . P 1 2 . 
C110 C 0.6744(11) 0.431(2) 0.9978(5) 0.0423 0.50(7) Uani D . P 1 2 . 
C111 C 0.6040(12) 0.4666(16) 0.9825(9) 0.0450 0.50(7) Uani D . P 1 2 . 
C112 C 0.6029(11) 0.4834(7) 0.8989(12) 0.0317 0.50(7) Uani D . P 1 2 . 
C115 C 0.5091(7) 0.5173(4) 0.6584(4) 0.0440 0.491(19) Uani D . P 2 2 . 
B1 B 0.7496(2) 0.0350(3) 0.7520(2) 0.0170 1.0000 Uani . . . . . . 
C30 C 0.6821(2) 0.0901(2) 0.7673(2) 0.0174 1.0000 Uani . . . . . . 
C31 C 0.6687(2) 0.1204(2) 0.8368(2) 0.0197 1.0000 Uani . . . . . . 
C32 C 0.6122(2) 0.1685(2) 0.85070(18) 0.0239 1.0000 Uani D . . . . . 
C33 C 0.5666(2) 0.1895(3) 0.7947(2) 0.0226 1.0000 Uani . . . . . . 
C34 C 0.58068(18) 0.1636(2) 0.72460(18) 0.0218 1.0000 Uani D . . . . . 
C35 C 0.6367(2) 0.1142(2) 0.7111(2) 0.0190 1.0000 Uani . . . . . . 
C36 C 0.59858(14) 0.19224(15) 0.92841(12) 0.0364 1.0000 Uani D . . . . . 
C37 C 0.53535(12) 0.18757(14) 0.66115(12) 0.0314 1.0000 Uani D . . . . . 
C38 C 0.7355(2) -0.0266(2) 0.6854(2) 0.0170 1.0000 Uani . . . . . . 
C39 C 0.6700(2) -0.0603(3) 0.6736(2) 0.0214 1.0000 Uani . . . . . . 
C40 C 0.65992(18) -0.1172(2) 0.6217(2) 0.0259 1.0000 Uani D . . . . . 
C41 C 0.7153(2) -0.1438(3) 0.5796(3) 0.0258 1.0000 Uani . . . . . . 
C42 C 0.78100(18) -0.1125(2) 0.5917(2) 0.0247 1.0000 Uani D . . . . . 
C43 C 0.7906(2) -0.0551(2) 0.6433(2) 0.0191 1.0000 Uani . . . . . . 
C44 C 0.59062(12) -0.15606(16) 0.61128(17) 0.0406 1.0000 Uani D . . . . . 
C45 C 0.84305(12) -0.13939(15) 0.54908(14) 0.0367 1.0000 Uani D . . . . . 
C46 C 0.8150(2) 0.0925(2) 0.7326(2) 0.0166 1.0000 Uani . . . . . . 
C47 C 0.8280(2) 0.1174(2) 0.6609(2) 0.0182 1.0000 Uani . . . . . . 
C48 C 0.8833(2) 0.1657(2) 0.6438(2) 0.0194 1.0000 Uani . . . . . . 
C49 C 0.9276(2) 0.1930(2) 0.6988(2) 0.0200 1.0000 Uani . . . . . . 
C50 C 0.9144(2) 0.1718(2) 0.7702(2) 0.0190 1.0000 Uani . . . . . . 
C51 C 0.8595(2) 0.1224(2) 0.7870(2) 0.0173 1.0000 Uani . . . . . . 
C52 C 0.8988(3) 0.1829(3) 0.5648(2) 0.0249 1.0000 Uani . . . . . . 
C53 C 0.9602(3) 0.2001(3) 0.8321(2) 0.0263 1.0000 Uani . . . . . . 
C54 C 0.7684(2) -0.0205(2) 0.8225(2) 0.0172 1.0000 Uani . . . . . . 
C55 C 0.8354(2) -0.0513(2) 0.8320(2) 0.0191 1.0000 Uani . . . . . . 
C56 C 0.8509(2) -0.1029(3) 0.8875(2) 0.0220 1.0000 Uani . . . . . . 
C57 C 0.8001(2) -0.1264(2) 0.9368(2) 0.0225 1.0000 Uani . . . . . . 
C58 C 0.73309(18) -0.0974(2) 0.9279(2) 0.0241 1.0000 Uani D . . . . . 
C59 C 0.7176(2) -0.0461(2) 0.8717(2) 0.0198 1.0000 Uani . . . . . . 
C60 C 0.9245(2) -0.1321(3) 0.8960(3) 0.0302 1.0000 Uani . . . . . . 
C61 C 0.67523(12) -0.12322(15) 0.97746(13) 0.0343 1.0000 Uani D . . . . . 
F1 F 0.6571(2) 0.2048(4) 0.9661(2) 0.0599 0.744(12) Uani D . P 3 1 . 
F2 F 0.5634(4) 0.1405(3) 0.9656(2) 0.0658 0.744(12) Uani D . P 3 1 . 
F3 F 0.5612(3) 0.2562(3) 0.93271(17) 0.0304 0.744(12) Uani D . P 3 1 . 
F4 F 0.4926(4) 0.2458(4) 0.6780(2) 0.0364 0.66(2) Uani D . P 4 1 . 
F5 F 0.5726(2) 0.2104(6) 0.6034(3) 0.0368 0.66(2) Uani D . P 4 1 . 
F6 F 0.4941(4) 0.1318(3) 0.6370(4) 0.0482 0.66(2) Uani D . P 4 1 . 
F7 F 0.5915(2) -0.2278(3) 0.6335(5) 0.0526 0.611(11) Uani D . P 5 1 . 
F8 F 0.5396(2) -0.1227(4) 0.6477(4) 0.0599 0.611(11) Uani D . P 5 1 . 
F9 F 0.5701(3) -0.1576(5) 0.5411(3) 0.0569 0.611(11) Uani D . P 5 1 . 
F10 F 0.8298(2) -0.2026(4) 0.5110(5) 0.0390 0.71(3) Uani D . P 6 1 . 
F11 F 0.8653(4) -0.0881(3) 0.5005(5) 0.0557 0.71(3) Uani D . P 6 1 . 
F12 F 0.8982(3) -0.1553(7) 0.5920(2) 0.0496 0.71(3) Uani D . P 6 1 . 
F13 F 0.92751(17) 0.25152(18) 0.55587(16) 0.0354 1.0000 Uani . . . . . . 
F14 F 0.84134(17) 0.1817(2) 0.52235(16) 0.0384 1.0000 Uani . . . . . . 
F15 F 0.9429(2) 0.1323(2) 0.53606(18) 0.0487 1.0000 Uani . . . . . . 
F16 F 0.92297(19) 0.2337(2) 0.88419(19) 0.0511 1.0000 Uani . . . . . . 
F17 F 1.00669(18) 0.2516(2) 0.81015(18) 0.0428 1.0000 Uani . . . . . . 
F18 F 0.9954(2) 0.1443(2) 0.8642(2) 0.0568 1.0000 Uani . . . . . . 
F19 F 0.96930(16) -0.0769(2) 0.9169(2) 0.0469 1.0000 Uani . . . . . . 
F20 F 0.95031(18) -0.1572(2) 0.8319(2) 0.0494 1.0000 Uani . . . . . . 
F21 F 0.93094(18) -0.1872(3) 0.9440(3) 0.0609 1.0000 Uani . . . . . . 
F22 F 0.6427(5) -0.0656(3) 1.0101(6) 0.0510 0.58(2) Uani D . P 7 1 . 
F23 F 0.6981(2) -0.1688(6) 1.0315(4) 0.0368 0.58(2) Uani D . P 7 1 . 
F24 F 0.6258(4) -0.1621(6) 0.9419(3) 0.0460 0.58(2) Uani D . P 7 1 . 
F101 F 0.5945(7) 0.1337(3) 0.9739(3) 0.0385 0.256(12) Uani D . P 3 2 . 
F102 F 0.5393(4) 0.2301(7) 0.9355(2) 0.0428 0.256(12) Uani D . P 3 2 . 
F103 F 0.6489(4) 0.2375(7) 0.9554(3) 0.0379 0.256(12) Uani D . P 3 2 . 
F104 F 0.5674(4) 0.2361(7) 0.6167(5) 0.0344 0.34(2) Uani D . P 4 2 . 
F105 F 0.5155(7) 0.1291(3) 0.6193(6) 0.0345 0.34(2) Uani D . P 4 2 . 
F106 F 0.4767(5) 0.2217(9) 0.6824(2) 0.0454 0.34(2) Uani D . P 4 2 . 
F107 F 0.5765(4) -0.2048(6) 0.6644(5) 0.0646 0.389(11) Uani D . P 5 2 . 
F108 F 0.5376(2) -0.1078(3) 0.6094(7) 0.0455 0.389(11) Uani D . P 5 2 . 
F109 F 0.5871(3) -0.1950(6) 0.5496(4) 0.0537 0.389(11) Uani D . P 5 2 . 
F110 F 0.8499(6) -0.1035(8) 0.4851(6) 0.0463 0.29(3) Uani D . P 6 2 . 
F111 F 0.9032(3) -0.1291(11) 0.5849(5) 0.0379 0.29(3) Uani D . P 6 2 . 
F112 F 0.8398(5) -0.2132(4) 0.5333(9) 0.0407 0.29(3) Uani D . P 6 2 . 
F122 F 0.6983(2) -0.1431(9) 1.0438(4) 0.0441 0.42(2) Uani D . P 7 2 . 
F123 F 0.6410(6) -0.1835(6) 0.9511(5) 0.0467 0.42(2) Uani D . P 7 2 . 
F124 F 0.6270(5) -0.0696(4) 0.9882(7) 0.0369 0.42(2) Uani D . P 7 2 . 
H21 H 0.8020 0.5900 0.7154 0.0360 1.0000 Uiso R . . . . . 
H22 H 0.7823 0.6522 0.6552 0.0359 1.0000 Uiso R . . . . . 
H11 H 0.6845 0.5939 0.7544 0.0352 1.0000 Uiso R . . . . . 
H12 H 0.6704 0.6558 0.6926 0.0351 1.0000 Uiso R . . . . . 
H31 H 0.8578 0.7215 0.7332 0.0441 1.0000 Uiso R . . . . . 
H41 H 0.8491 0.7073 0.8618 0.0488 1.0000 Uiso R . . . . . 
H42 H 0.8391 0.6222 0.8350 0.0487 1.0000 Uiso R . . . . . 
H51 H 0.7384 0.7100 0.9005 0.0480 1.0000 Uiso R . . . . . 
H52 H 0.7275 0.6248 0.8736 0.0478 1.0000 Uiso R . . . . . 
H61 H 0.6567 0.7258 0.8038 0.0429 1.0000 Uiso R . . . . . 
H71 H 0.7657 0.8033 0.7916 0.0468 1.0000 Uiso R . . . . . 
H72 H 0.7407 0.7810 0.7122 0.0471 1.0000 Uiso R . . . . . 
H81 H 0.6069 0.3758 0.8710 0.0327 0.50(7) Uiso R . P 1 1 . 
H91 H 0.7480 0.4112 0.9048 0.0370 0.50(7) Uiso R . P 1 1 . 
H92 H 0.7110 0.3317 0.9152 0.0368 0.50(7) Uiso R . P 1 1 . 
H101 H 0.7187 0.4390 1.0212 0.0409 0.50(7) Uiso R . P 1 1 . 
H102 H 0.6735 0.3635 1.0258 0.0411 0.50(7) Uiso R . P 1 1 . 
H111 H 0.6180 0.4989 1.0233 0.0459 0.50(7) Uiso R . P 1 1 . 
H112 H 0.5766 0.4240 0.9997 0.0462 0.50(7) Uiso R . P 1 1 . 
H121 H 0.6469 0.5281 0.9035 0.0361 0.50(7) Uiso R . P 1 1 . 
H122 H 0.5692 0.4973 0.8939 0.0360 0.50(7) Uiso R . P 1 1 . 
H131 H 0.5598 0.3764 0.7355 0.0308 1.0000 Uiso R . . . . . 
H142 H 0.5621 0.5388 0.7255 0.0430 0.509(19) Uiso R . P 2 1 . 
H141 H 0.5173 0.4914 0.7824 0.0431 0.509(19) Uiso R . P 2 1 . 
H144 H 0.5642 0.5321 0.7560 0.0430 0.491(19) Uiso R . P 2 2 . 
H143 H 0.4991 0.4774 0.7655 0.0430 0.491(19) Uiso R . P 2 2 . 
H152 H 0.4554 0.5213 0.6628 0.0361 0.509(19) Uiso R . P 2 1 . 
H151 H 0.4494 0.4358 0.6894 0.0360 0.509(19) Uiso R . P 2 1 . 
H162 H 0.5317 0.4919 0.5741 0.0511 0.509(19) Uiso R . P 2 1 . 
H161 H 0.4996 0.4091 0.5820 0.0511 0.509(19) Uiso R . P 2 1 . 
H164 H 0.5277 0.4654 0.5566 0.0510 0.491(19) Uiso R . P 2 2 . 
H163 H 0.4881 0.4111 0.6124 0.0510 0.491(19) Uiso R . P 2 2 . 
H171 H 0.6315 0.4550 0.6232 0.0367 1.0000 Uiso R . . . . . 
H172 H 0.6050 0.3702 0.6192 0.0369 1.0000 Uiso R . . . . . 
H181 H 0.6841 0.2908 0.7846 0.0289 1.0000 Uiso R . . . . . 
H182 H 0.6948 0.3140 0.7014 0.0291 1.0000 Uiso R . . . . . 
H191 H 0.7970 0.3237 0.8126 0.0281 1.0000 Uiso R . . . . . 
H192 H 0.8062 0.2879 0.7340 0.0279 1.0000 Uiso R . . . . . 
H201 H 0.8848 0.3672 0.6335 0.0260 1.0000 Uiso R . . . . . 
H211 H 0.7850 0.3071 0.5952 0.0329 1.0000 Uiso R . . . . . 
H212 H 0.7408 0.3831 0.6005 0.0329 1.0000 Uiso R . . . . . 
H221 H 0.8127 0.3358 0.4783 0.0429 1.0000 Uiso R . . . . . 
H222 H 0.7620 0.4068 0.4844 0.0430 1.0000 Uiso R . . . . . 
H231 H 0.9083 0.4074 0.5011 0.0400 1.0000 Uiso R . . . . . 
H232 H 0.8602 0.4740 0.4710 0.0399 1.0000 Uiso R . . . . . 
H241 H 0.9076 0.4922 0.5989 0.0352 1.0000 Uiso R . . . . . 
H242 H 0.8268 0.5086 0.5873 0.0349 1.0000 Uiso R . . . . . 
H251 H 0.9273 0.3803 0.7707 0.0266 1.0000 Uiso R . . . . . 
H262 H 0.9292 0.5398 0.7494 0.0329 1.0000 Uiso R . . . . . 
H261 H 0.9741 0.4804 0.7042 0.0330 1.0000 Uiso R . . . . . 
H271 H 1.0336 0.5378 0.8134 0.0419 1.0000 Uiso R . . . . . 
H272 H 1.0396 0.4477 0.8082 0.0418 1.0000 Uiso R . . . . . 
H281 H 0.9883 0.4549 0.9213 0.0450 1.0000 Uiso R . . . . . 
H282 H 0.9532 0.5335 0.9020 0.0451 1.0000 Uiso R . . . . . 
H291 H 0.8909 0.3950 0.8863 0.0340 1.0000 Uiso R . . . . . 
H292 H 0.8556 0.4749 0.8699 0.0339 1.0000 Uiso R . . . . . 
H1081 H 0.6118 0.3793 0.8735 0.0328 0.50(7) Uiso R . P 1 2 . 
H1092 H 0.7431 0.4410 0.9093 0.0419 0.50(7) Uiso R . P 1 2 . 
H1091 H 0.7224 0.3550 0.9241 0.0420 0.50(7) Uiso R . P 1 2 . 
H1101 H 0.7053 0.4664 1.0225 0.0509 0.50(7) Uiso R . P 1 2 . 
H1102 H 0.6687 0.3862 1.0285 0.0511 0.50(7) Uiso R . P 1 2 . 
H1112 H 0.5992 0.5135 1.0102 0.0559 0.50(7) Uiso R . P 1 2 . 
H1111 H 0.5660 0.4322 0.9952 0.0561 0.50(7) Uiso R . P 1 2 . 
H1122 H 0.6262 0.5309 0.8878 0.0400 0.50(7) Uiso R . P 1 2 . 
H1121 H 0.5552 0.4849 0.8801 0.0399 0.50(7) Uiso R . P 1 2 . 
H1152 H 0.5334 0.5623 0.6415 0.0530 0.491(19) Uiso R . P 2 2 . 
H1151 H 0.4594 0.5274 0.6607 0.0530 0.491(19) Uiso R . P 2 2 . 
H311 H 0.6988 0.1080 0.8756 0.0240 1.0000 Uiso R . . . . . 
H331 H 0.5285 0.2201 0.8039 0.0268 1.0000 Uiso R . . . . . 
H351 H 0.6438 0.0972 0.6636 0.0230 1.0000 Uiso R . . . . . 
H391 H 0.6325 -0.0439 0.7016 0.0261 1.0000 Uiso R . . . . . 
H411 H 0.7086 -0.1822 0.5447 0.0310 1.0000 Uiso R . . . . . 
H431 H 0.8350 -0.0351 0.6496 0.0230 1.0000 Uiso R . . . . . 
H471 H 0.7986 0.1016 0.6231 0.0219 1.0000 Uiso R . . . . . 
H491 H 0.9650 0.2246 0.6872 0.0240 1.0000 Uiso R . . . . . 
H511 H 0.8518 0.1089 0.8358 0.0211 1.0000 Uiso R . . . . . 
H551 H 0.8707 -0.0371 0.7997 0.0230 1.0000 Uiso R . . . . . 
H571 H 0.8109 -0.1601 0.9745 0.0271 1.0000 Uiso R . . . . . 
H591 H 0.6722 -0.0281 0.8672 0.0240 1.0000 Uiso R . . . . . 
loop_
_atom_site_aniso_label
_atom_site_aniso_U_11
_atom_site_aniso_U_22
_atom_site_aniso_U_33
_atom_site_aniso_U_23
_atom_site_aniso_U_13
_atom_site_aniso_U_12
Rh1 0.01821(17) 0.02177(18) 0.02021(17) -0.00072(11) -0.00078(11) -0.00025(11) 
P1 0.0167(5) 0.0257(5) 0.0189(5) -0.0006(4) -0.0006(4) -0.0010(4) 
P2 0.0156(5) 0.0248(5) 0.0167(5) 0.0011(4) -0.0004(4) 0.0001(4) 
C1 0.034(2) 0.022(2) 0.033(2) 0.0019(18) -0.007(2) 0.0024(18) 
C2 0.034(3) 0.028(2) 0.029(2) 0.0025(19) 0.0024(19) -0.0014(19) 
C3 0.036(3) 0.041(3) 0.032(3) 0.001(2) 0.003(2) -0.008(2) 
C4 0.049(3) 0.036(3) 0.037(3) 0.000(2) -0.006(2) -0.001(2) 
C5 0.049(3) 0.037(3) 0.034(3) -0.001(2) -0.002(2) -0.006(2) 
C6 0.032(3) 0.033(3) 0.042(3) -0.003(2) 0.005(2) 0.001(2) 
C7 0.054(3) 0.028(3) 0.036(3) 0.001(2) -0.006(2) -0.003(2) 
C8 0.0220(19) 0.039(2) 0.0194(19) -0.0002(17) 0.0009(16) -0.0052(17) 
C9 0.027(5) 0.048(6) 0.019(5) 0.002(4) -0.002(4) 0.003(4) 
C10 0.034(6) 0.049(7) 0.020(5) 0.003(4) -0.006(4) 0.007(5) 
C11 0.046(7) 0.049(6) 0.020(5) -0.001(4) -0.005(4) 0.010(5) 
C12 0.033(6) 0.034(5) 0.017(4) -0.006(4) -0.010(4) -0.006(4) 
C13 0.021(2) 0.033(2) 0.022(2) -0.0009(18) -0.0022(16) 0.0003(18) 
C14 0.023(2) 0.052(3) 0.031(3) -0.008(2) -0.0011(19) 0.008(2) 
C15 0.018(4) 0.034(6) 0.037(5) -0.002(4) -0.003(3) 0.002(4) 
C16 0.031(3) 0.068(4) 0.030(3) 0.001(3) -0.003(2) 0.013(3) 
C17 0.026(2) 0.041(3) 0.025(2) -0.007(2) -0.0029(18) 0.005(2) 
C18 0.020(2) 0.027(2) 0.026(2) -0.0011(17) 0.0032(16) 0.0001(16) 
C19 0.019(2) 0.027(2) 0.023(2) 0.0032(17) 0.0014(16) -0.0001(16) 
C20 0.0186(19) 0.029(2) 0.0174(19) -0.0015(16) 0.0003(15) 0.0031(16) 
C21 0.023(2) 0.036(3) 0.025(2) -0.0054(19) -0.0017(17) 0.0008(18) 
C22 0.035(3) 0.048(3) 0.023(2) -0.002(2) -0.0054(19) 0.001(2) 
C23 0.043(3) 0.035(3) 0.022(2) 0.0041(19) 0.001(2) 0.005(2) 
C24 0.035(3) 0.032(2) 0.020(2) 0.0021(18) 0.0016(18) 0.001(2) 
C25 0.024(2) 0.027(2) 0.0173(19) 0.0028(16) 0.0006(16) -0.0012(17) 
C26 0.022(2) 0.036(3) 0.025(2) 0.0042(19) -0.0007(17) -0.0026(18) 
C27 0.028(2) 0.046(3) 0.030(3) 0.003(2) -0.003(2) -0.007(2) 
C28 0.024(2) 0.063(4) 0.025(2) -0.007(2) -0.0006(19) -0.006(2) 
C29 0.024(2) 0.040(3) 0.020(2) 0.0045(18) -0.0017(17) -0.0033(19) 
C108 0.0220(19) 0.039(2) 0.0194(19) -0.0002(17) 0.0009(16) -0.0052(17) 
C109 0.028(5) 0.057(7) 0.025(5) 0.000(4) -0.001(4) -0.001(4) 
C110 0.035(6) 0.061(8) 0.031(5) -0.003(5) 0.004(4) 0.003(6) 
C111 0.036(6) 0.066(7) 0.034(6) -0.003(5) -0.005(5) 0.005(5) 
C112 0.028(5) 0.044(5) 0.023(5) -0.010(4) -0.003(4) -0.005(4) 
C115 0.034(7) 0.058(8) 0.040(5) -0.002(5) -0.009(5) 0.018(6) 
B1 0.016(2) 0.021(2) 0.0142(19) -0.0007(16) 0.0016(15) -0.0005(16) 
C30 0.0165(18) 0.0191(19) 0.0167(18) 0.0015(15) 0.0008(14) -0.0019(14) 
C31 0.0207(19) 0.022(2) 0.0167(19) 0.0026(15) -0.0012(15) 0.0010(15) 
C32 0.029(2) 0.0232(19) 0.0195(18) 0.0012(15) 0.0016(16) 0.0036(16) 
C33 0.0177(19) 0.024(2) 0.026(2) 0.0035(17) 0.0028(16) 0.0054(16) 
C34 0.0187(18) 0.0246(19) 0.0220(18) 0.0043(15) -0.0021(15) -0.0005(15) 
C35 0.0186(19) 0.023(2) 0.0152(18) 0.0021(15) -0.0014(15) -0.0014(15) 
C36 0.047(2) 0.0380(19) 0.0241(17) -0.0002(15) 0.0025(15) 0.0163(16) 
C37 0.0304(17) 0.0351(18) 0.0286(16) 0.0053(14) -0.0075(14) 0.0029(14) 
C38 0.0211(19) 0.0168(18) 0.0132(17) 0.0013(14) -0.0009(14) -0.0002(15) 
C39 0.020(2) 0.022(2) 0.022(2) 0.0004(16) 0.0016(15) -0.0016(16) 
C40 0.0193(18) 0.026(2) 0.033(2) -0.0034(17) -0.0030(16) -0.0045(15) 
C41 0.027(2) 0.026(2) 0.024(2) -0.0049(17) -0.0023(17) -0.0046(18) 
C42 0.0257(19) 0.028(2) 0.0207(18) -0.0059(16) 0.0020(15) -0.0024(16) 
C43 0.0194(19) 0.021(2) 0.0166(18) -0.0008(15) -0.0007(15) -0.0029(15) 
C44 0.0215(16) 0.0418(19) 0.058(2) -0.0102(17) -0.0039(16) -0.0092(15) 
C45 0.0302(17) 0.0424(19) 0.0377(18) -0.0169(16) 0.0082(15) -0.0053(15) 
C46 0.0181(18) 0.0170(19) 0.0147(18) -0.0015(14) 0.0002(14) 0.0018(14) 
C47 0.0201(19) 0.0180(19) 0.0163(18) -0.0011(14) -0.0027(15) 0.0004(15) 
C48 0.0212(19) 0.021(2) 0.0159(19) 0.0007(15) 0.0012(15) 0.0007(16) 
C49 0.0189(19) 0.0182(19) 0.023(2) -0.0014(15) 0.0024(15) -0.0020(15) 
C50 0.0181(18) 0.020(2) 0.0193(19) -0.0026(15) -0.0021(15) -0.0002(15) 
C51 0.0192(18) 0.0176(19) 0.0151(18) -0.0001(14) 0.0008(14) 0.0018(15) 
C52 0.029(2) 0.027(2) 0.019(2) 0.0006(17) 0.0026(17) -0.0057(18) 
C53 0.028(2) 0.030(2) 0.021(2) -0.0019(17) -0.0023(17) -0.0074(18) 
C54 0.0186(19) 0.0184(19) 0.0146(18) -0.0017(14) -0.0001(14) -0.0010(15) 
C55 0.0200(19) 0.0186(19) 0.0188(19) -0.0008(15) 0.0017(15) -0.0006(15) 
C56 0.0178(19) 0.024(2) 0.025(2) 0.0004(17) -0.0015(16) 0.0022(16) 
C57 0.027(2) 0.019(2) 0.021(2) 0.0058(16) -0.0018(16) 0.0017(16) 
C58 0.0257(19) 0.0239(19) 0.0228(19) 0.0032(16) 0.0022(15) 0.0026(16) 
C59 0.0193(19) 0.0192(19) 0.0209(19) 0.0029(15) 0.0010(15) 0.0012(15) 
C60 0.021(2) 0.029(2) 0.040(3) 0.010(2) 0.0003(19) 0.0038(18) 
C61 0.0317(17) 0.0377(18) 0.0337(17) 0.0150(15) 0.0080(14) 0.0058(14) 
F1 0.051(3) 0.089(4) 0.039(2) -0.032(2) -0.019(2) 0.047(3) 
F2 0.111(4) 0.047(3) 0.040(3) 0.005(2) 0.030(3) 0.001(3) 
F3 0.034(2) 0.033(2) 0.0240(18) -0.0057(15) 0.0037(15) 0.0132(18) 
F4 0.034(3) 0.039(3) 0.036(2) 0.004(2) -0.007(2) 0.011(2) 
F5 0.040(2) 0.045(3) 0.025(2) 0.010(2) 0.0012(18) 0.014(2) 
F6 0.050(3) 0.048(3) 0.046(3) 0.010(2) -0.025(3) -0.013(2) 
F7 0.024(2) 0.038(3) 0.096(4) 0.003(3) 0.004(3) -0.008(2) 
F8 0.028(3) 0.071(4) 0.081(4) -0.040(3) 0.008(3) -0.010(3) 
F9 0.042(3) 0.072(4) 0.056(3) -0.001(3) -0.016(3) -0.018(3) 
F10 0.034(2) 0.046(3) 0.036(3) -0.026(2) -0.001(2) -0.001(2) 
F11 0.062(3) 0.047(3) 0.058(3) -0.011(2) 0.037(3) -0.013(3) 
F12 0.031(2) 0.063(4) 0.055(3) -0.029(2) -0.003(2) 0.009(2) 
F13 0.0469(18) 0.0354(16) 0.0239(14) 0.0058(12) 0.0039(12) -0.0165(13) 
F14 0.0405(17) 0.055(2) 0.0193(13) 0.0095(13) -0.0050(12) -0.0149(14) 
F15 0.068(2) 0.052(2) 0.0265(15) 0.0015(14) 0.0191(15) 0.0235(18) 
F16 0.0435(19) 0.078(3) 0.0317(17) -0.0312(17) 0.0020(14) -0.0131(18) 
F17 0.0389(17) 0.057(2) 0.0329(16) 0.0003(14) -0.0070(13) -0.0292(15) 
F18 0.072(3) 0.0391(19) 0.059(2) 0.0018(16) -0.046(2) 0.0003(17) 
F19 0.0240(15) 0.056(2) 0.061(2) -0.0005(17) -0.0102(14) -0.0035(14) 
F20 0.0333(17) 0.061(2) 0.054(2) -0.0082(17) 0.0037(15) 0.0220(16) 
F21 0.0280(16) 0.069(3) 0.086(3) 0.051(2) 0.0077(17) 0.0160(16) 
F22 0.057(4) 0.052(3) 0.044(3) 0.009(3) 0.024(3) 0.014(3) 
F23 0.037(3) 0.037(4) 0.036(3) 0.019(3) 0.010(2) 0.007(2) 
F24 0.028(3) 0.061(4) 0.049(3) 0.022(3) 0.002(2) -0.007(3) 
F101 0.050(5) 0.047(4) 0.018(4) 0.007(3) 0.008(4) 0.027(4) 
F102 0.046(5) 0.051(5) 0.031(5) -0.003(4) 0.006(4) 0.016(4) 
F103 0.051(5) 0.030(5) 0.033(4) -0.004(4) -0.004(4) 0.020(4) 
F104 0.047(4) 0.023(4) 0.033(4) 0.010(3) -0.014(3) -0.001(3) 
F105 0.034(4) 0.041(4) 0.029(4) 0.005(3) -0.013(4) -0.005(3) 
F106 0.031(4) 0.063(5) 0.042(4) 0.001(4) -0.011(3) 0.014(4) 
F107 0.043(4) 0.071(5) 0.080(5) 0.017(4) -0.004(4) -0.022(4) 
F108 0.013(3) 0.046(4) 0.078(5) -0.009(4) -0.013(3) -0.006(3) 
F109 0.028(4) 0.056(5) 0.078(4) -0.041(4) 0.001(4) -0.010(3) 
F110 0.044(5) 0.055(5) 0.040(4) -0.018(4) 0.009(4) -0.018(4) 
F111 0.024(4) 0.035(5) 0.054(5) -0.030(4) 0.007(4) -0.009(4) 
F112 0.034(4) 0.042(4) 0.046(5) -0.018(4) 0.007(4) 0.000(4) 
F122 0.038(4) 0.060(5) 0.034(3) 0.017(3) 0.005(3) 0.009(3) 
F123 0.041(4) 0.044(4) 0.056(4) 0.007(3) 0.010(3) -0.003(3) 
F124 0.029(3) 0.052(4) 0.031(4) 0.024(3) 0.009(3) 0.018(3) 

_refine_ls_extinction_method 
    'None'
_oxford_refine_ls_scale 1.419(8) 
loop_
 _geom_bond_atom_site_label_1
 _geom_bond_site_symmetry_1
 _geom_bond_atom_site_label_2
 _geom_bond_site_symmetry_2
 _geom_bond_distance
 _geom_bond_publ_flag
Rh1 . P1 . 2.2065(11)    yes
Rh1 . P2 . 2.2059(11)    yes
P1 . C8 . 1.846(4)    yes
P1 . C13 . 1.843(5)    yes
P1 . C18 . 1.850(5)    yes
P1 . C13 . 1.843(5)    yes
P1 . C18 . 1.850(5)    yes
P1 . C108 . 1.846(4)    yes
P2 . C19 . 1.854(5)    yes
P2 . C20 . 1.836(4)    yes
P2 . C25 . 1.841(5)    yes
C1 . C2 . 1.550(7)    yes
C1 . C6 . 1.559(7)    yes
C1 . H11 . 0.973    no
C1 . H12 . 0.972    no
C2 . C3 . 1.556(7)    yes
C2 . H21 . 0.979    no
C2 . H22 . 0.974    no
C3 . C4 . 1.530(8)    yes
C3 . C7 . 1.554(8)    yes
C3 . H31 . 0.978    no
C4 . C5 . 1.541(9)    yes
C4 . H41 . 0.974    no
C4 . H42 . 0.971    no
C5 . C6 . 1.535(8)    yes
C5 . H51 . 0.976    no
C5 . H52 . 0.971    no
C6 . C7 . 1.534(8)    yes
C6 . H61 . 0.979    no
C7 . H71 . 0.962    no
C7 . H72 . 0.964    no
C8 . C9 . 1.552(7)    yes
C8 . C12 . 1.534(7)    yes
C8 . H81 . 0.980    no
C9 . C10 . 1.553(7)    yes
C9 . H91 . 0.966    no
C9 . H92 . 0.970    no
C10 . C11 . 1.494(7)    yes
C10 . H101 . 0.972    no
C10 . H102 . 0.972    no
C11 . C12 . 1.546(7)    yes
C11 . H111 . 0.975    no
C11 . H112 . 0.975    no
C12 . H121 . 0.969    no
C12 . H122 . 0.974    no
C13 . C14 . 1.543(7)    yes
C13 . C17 . 1.538(6)    yes
C13 . H131 . 0.978    no
C14 . C15 . 1.547(5)    yes
C14 . H142 . 0.970    no
C14 . H141 . 0.970    no
C14 . C115 . 1.543(5)    yes
C14 . H144 . 0.968    no
C14 . H143 . 0.969    no
C15 . C16 . 1.533(5)    yes
C15 . H152 . 0.968    no
C15 . H151 . 0.972    no
C16 . C17 . 1.534(7)    yes
C16 . H162 . 0.972    no
C16 . H161 . 0.970    no
C16 . C17 . 1.534(7)    yes
C16 . C115 . 1.537(5)    yes
C16 . H164 . 0.972    no
C16 . H163 . 0.969    no
C17 . H171 . 0.963    no
C17 . H172 . 0.971    no
C18 . C19 . 1.518(6)    yes
C18 . H181 . 0.966    no
C18 . H182 . 0.969    no
C19 . H191 . 0.963    no
C19 . H192 . 0.964    no
C20 . C21 . 1.544(6)    yes
C20 . C24 . 1.536(7)    yes
C20 . H201 . 0.979    no
C21 . C22 . 1.549(7)    yes
C21 . H211 . 0.973    no
C21 . H212 . 0.969    no
C22 . C23 . 1.529(8)    yes
C22 . H221 . 0.970    no
C22 . H222 . 0.968    no
C23 . C24 . 1.524(7)    yes
C23 . H231 . 0.969    no
C23 . H232 . 0.972    no
C24 . H241 . 0.973    no
C24 . H242 . 0.969    no
C25 . C26 . 1.533(6)    yes
C25 . C29 . 1.544(6)    yes
C25 . H251 . 0.968    no
C26 . C27 . 1.528(7)    yes
C26 . H262 . 0.969    no
C26 . H261 . 0.976    no
C27 . C28 . 1.538(7)    yes
C27 . H271 . 0.968    no
C27 . H272 . 0.978    no
C28 . C29 . 1.542(7)    yes
C28 . H281 . 0.971    no
C28 . H282 . 0.969    no
C29 . H291 . 0.967    no
C29 . H292 . 0.967    no
C108 . C109 . 1.538(8)    yes
C108 . C112 . 1.541(7)    yes
C108 . H1081 . 0.876    no
C109 . C110 . 1.551(7)    yes
C109 . H1092 . 0.969    no
C109 . H1091 . 0.971    no
C110 . C111 . 1.510(7)    yes
C110 . H1101 . 0.969    no
C110 . H1102 . 0.970    no
C111 . C112 . 1.554(8)    yes
C111 . H1112 . 0.972    no
C111 . H1111 . 0.974    no
C112 . H1122 . 0.968    no
C112 . H1121 . 0.971    no
C115 . H1152 . 0.969    no
C115 . H1151 . 0.968    no
B1 . C30 . 1.638(6)    yes
B1 . C38 . 1.647(6)    yes
B1 . C46 . 1.648(6)    yes
B1 . C54 . 1.653(6)    yes
C30 . C31 . 1.399(6)    yes
C30 . C35 . 1.405(6)    yes
C31 . C32 . 1.394(6)    yes
C31 . H311 . 0.936    no
C32 . C33 . 1.388(6)    yes
C32 . C36 . 1.501(3)    yes
C33 . C34 . 1.384(6)    yes
C33 . H331 . 0.923    no
C34 . C35 . 1.402(6)    yes
C34 . C37 . 1.501(3)    yes
C35 . H351 . 0.927    no
C36 . F1 . 1.327(4)    yes
C36 . F2 . 1.321(4)    yes
C36 . F3 . 1.335(4)    yes
C36 . F101 . 1.325(5)    yes
C36 . F102 . 1.321(5)    yes
C36 . F103 . 1.340(5)    yes
C37 . F4 . 1.347(4)    yes
C37 . F5 . 1.336(4)    yes
C37 . F6 . 1.331(4)    yes
C37 . F104 . 1.328(5)    yes
C37 . F105 . 1.336(5)    yes
C37 . F106 . 1.330(5)    yes
C38 . C39 . 1.401(6)    yes
C38 . C43 . 1.399(6)    yes
C39 . C40 . 1.390(6)    yes
C39 . H391 . 0.926    no
C40 . C41 . 1.391(6)    yes
C40 . C44 . 1.500(3)    yes
C41 . C42 . 1.387(6)    yes
C41 . H411 . 0.936    no
C42 . C43 . 1.392(5)    yes
C42 . C45 . 1.497(3)    yes
C43 . H431 . 0.924    no
C44 . F7 . 1.326(5)    yes
C44 . F8 . 1.320(5)    yes
C44 . F9 . 1.336(5)    yes
C44 . F107 . 1.323(5)    yes
C44 . F108 . 1.322(5)    yes
C44 . F109 . 1.318(5)    yes
C45 . F10 . 1.335(4)    yes
C45 . F11 . 1.335(4)    yes
C45 . F12 . 1.338(4)    yes
C45 . F110 . 1.334(6)    yes
C45 . F111 . 1.330(5)    yes
C45 . F112 . 1.331(6)    yes
C46 . C47 . 1.403(6)    yes
C46 . C51 . 1.404(6)    yes
C47 . C48 . 1.391(6)    yes
C47 . H471 . 0.929    no
C48 . C49 . 1.393(6)    yes
C48 . C52 . 1.504(6)    yes
C49 . C50 . 1.380(6)    yes
C49 . H491 . 0.931    no
C50 . C51 . 1.396(6)    yes
C50 . C53 . 1.508(6)    yes
C51 . H511 . 0.934    no
C52 . F13 . 1.337(6)    yes
C52 . F14 . 1.338(6)    yes
C52 . F15 . 1.334(6)    yes
C53 . F16 . 1.329(6)    yes
C53 . F17 . 1.332(6)    yes
C53 . F18 . 1.325(6)    yes
C54 . C55 . 1.400(6)    yes
C54 . C59 . 1.397(6)    yes
C55 . C56 . 1.391(6)    yes
C55 . H551 . 0.931    no
C56 . C57 . 1.389(6)    yes
C56 . C60 . 1.503(6)    yes
C57 . C58 . 1.386(6)    yes
C57 . H571 . 0.930    no
C58 . C59 . 1.397(5)    yes
C58 . C61 . 1.501(3)    yes
C59 . H591 . 0.927    no
C60 . F19 . 1.348(6)    yes
C60 . F20 . 1.346(7)    yes
C60 . F21 . 1.311(6)    yes
C61 . F22 . 1.330(5)    yes
C61 . F23 . 1.343(5)    yes
C61 . F24 . 1.332(5)    yes
C61 . F122 . 1.332(5)    yes
C61 . F123 . 1.334(5)    yes
C61 . F124 . 1.334(5)    yes
loop_
 _geom_angle_atom_site_label_1
 _geom_angle_site_symmetry_1
 _geom_angle_atom_site_label_2
 _geom_angle_site_symmetry_2
 _geom_angle_atom_site_label_3
 _geom_angle_site_symmetry_3
 _geom_angle
 _geom_angle_publ_flag
P1 . Rh1 . P2 . 84.80(4)    yes
Rh1 . P1 . C8 . 117.63(14)    yes
Rh1 . P1 . C13 . 115.42(16)    yes
C8 . P1 . C13 . 104.3(2)    yes
Rh1 . P1 . C18 . 111.73(15)    yes
C8 . P1 . C18 . 103.0(2)    yes
C13 . P1 . C18 . 103.1(2)    yes
Rh1 . P1 . C13 . 115.42(16)    yes
Rh1 . P1 . C18 . 111.73(15)    yes
C13 . P1 . C18 . 103.1(2)    yes
Rh1 . P1 . C108 . 117.63(14)    yes
C13 . P1 . C108 . 104.3(2)    yes
C18 . P1 . C108 . 103.0(2)    yes
Rh1 . P2 . C19 . 112.00(15)    yes
Rh1 . P2 . C20 . 114.87(15)    yes
C19 . P2 . C20 . 104.5(2)    yes
Rh1 . P2 . C25 . 117.35(16)    yes
C19 . P2 . C25 . 102.3(2)    yes
C20 . P2 . C25 . 104.3(2)    yes
C2 . C1 . C6 . 102.6(4)    yes
C2 . C1 . H11 . 114.6    no
C6 . C1 . H11 . 109.4    no
C2 . C1 . H12 . 110.5    no
C6 . C1 . H12 . 109.9    no
H11 . C1 . H12 . 109.6    no
C1 . C2 . C3 . 103.2(4)    yes
C1 . C2 . H21 . 114.2    no
C3 . C2 . H21 . 109.7    no
C1 . C2 . H22 . 111.4    no
C3 . C2 . H22 . 108.7    no
H21 . C2 . H22 . 109.4    no
C2 . C3 . C4 . 108.2(4)    yes
C2 . C3 . C7 . 101.7(4)    yes
C4 . C3 . C7 . 101.8(5)    yes
C2 . C3 . H31 . 114.6    no
C4 . C3 . H31 . 114.9    no
C7 . C3 . H31 . 114.1    no
C3 . C4 . C5 . 103.2(5)    yes
C3 . C4 . H41 . 110.4    no
C5 . C4 . H41 . 110.9    no
C3 . C4 . H42 . 111.5    no
C5 . C4 . H42 . 111.4    no
H41 . C4 . H42 . 109.4    no
C4 . C5 . C6 . 103.4(5)    yes
C4 . C5 . H51 . 110.7    no
C6 . C5 . H51 . 110.5    no
C4 . C5 . H52 . 111.3    no
C6 . C5 . H52 . 111.4    no
H51 . C5 . H52 . 109.6    no
C5 . C6 . C1 . 108.6(4)    yes
C5 . C6 . C7 . 102.0(5)    yes
C1 . C6 . C7 . 102.0(4)    yes
C5 . C6 . H61 . 114.1    no
C1 . C6 . H61 . 114.2    no
C7 . C6 . H61 . 114.7    no
C6 . C7 . C3 . 93.3(4)    yes
C6 . C7 . H71 . 113.6    no
C3 . C7 . H71 . 113.8    no
C6 . C7 . H72 . 113.8    no
C3 . C7 . H72 . 112.3    no
H71 . C7 . H72 . 109.4    no
P1 . C8 . C9 . 112.2(5)    yes
P1 . C8 . C12 . 120.4(6)    yes
C9 . C8 . C12 . 103.22(10)    yes
P1 . C8 . H81 . 106.3    no
C9 . C8 . H81 . 106.8    no
C12 . C8 . H81 . 107.2    no
C8 . C9 . C10 . 104.28(10)    yes
C8 . C9 . H91 . 110.3    no
C10 . C9 . H91 . 110.8    no
C8 . C9 . H92 . 112.2    no
C10 . C9 . H92 . 109.9    no
H91 . C9 . H92 . 109.3    no
C9 . C10 . C11 . 107.05(10)    yes
C9 . C10 . H101 . 111.3    no
C11 . C10 . H101 . 109.1    no
C9 . C10 . H102 . 109.8    no
C11 . C10 . H102 . 110.2    no
H101 . C10 . H102 . 109.4    no
C10 . C11 . C12 . 105.52(10)    yes
C10 . C11 . H111 . 111.9    no
C12 . C11 . H111 . 109.1    no
C10 . C11 . H112 . 109.9    no
C12 . C11 . H112 . 110.6    no
H111 . C11 . H112 . 109.8    no
C11 . C12 . C8 . 101.27(10)    yes
C11 . C12 . H121 . 112.0    no
C8 . C12 . H121 . 111.7    no
C11 . C12 . H122 . 111.6    no
C8 . C12 . H122 . 110.5    no
H121 . C12 . H122 . 109.5    no
P1 . C13 . C14 . 116.0(3)    yes
P1 . C13 . C17 . 113.3(3)    yes
C14 . C13 . C17 . 103.3(4)    yes
P1 . C13 . H131 . 107.5    no
C14 . C13 . H131 . 108.1    no
C17 . C13 . H131 . 108.5    no
C13 . C14 . C15 . 99.3(4)    yes
C13 . C14 . H142 . 111.7    no
C15 . C14 . H142 . 112.2    no
C13 . C14 . H141 . 112.2    no
C15 . C14 . H141 . 111.5    no
H142 . C14 . H141 . 109.7    no
C13 . C14 . C115 . 107.8(3)    yes
C13 . C14 . H144 . 109.8    no
C115 . C14 . H144 . 109.6    no
C13 . C14 . H143 . 110.0    no
C115 . C14 . H143 . 110.1    no
H144 . C14 . H143 . 109.4    no
C14 . C15 . C16 . 104.03(7)    yes
C14 . C15 . H152 . 110.7    no
C16 . C15 . H152 . 110.7    no
C14 . C15 . H151 . 111.2    no
C16 . C15 . H151 . 110.6    no
H152 . C15 . H151 . 109.5    no
C15 . C16 . C17 . 106.6(4)    yes
C15 . C16 . H162 . 110.5    no
C17 . C16 . H162 . 109.9    no
C15 . C16 . H161 . 110.0    no
C17 . C16 . H161 . 110.2    no
H162 . C16 . H161 . 109.7    no
C17 . C16 . C115 . 102.0(5)    yes
C17 . C16 . H164 . 111.4    no
C115 . C16 . H164 . 111.8    no
C17 . C16 . H163 . 110.8    no
C115 . C16 . H163 . 110.6    no
H164 . C16 . H163 . 110.0    no
C13 . C17 . C16 . 104.1(4)    yes
C13 . C17 . H171 . 110.1    no
C16 . C17 . H171 . 109.9    no
C13 . C17 . H172 . 112.0    no
C16 . C17 . H172 . 111.4    no
H171 . C17 . H172 . 109.2    no
P1 . C18 . C19 . 109.6(3)    yes
P1 . C18 . H181 . 108.4    no
C19 . C18 . H181 . 111.3    no
P1 . C18 . H182 . 108.7    no
C19 . C18 . H182 . 108.6    no
H181 . C18 . H182 . 110.2    no
C18 . C19 . P2 . 109.3(3)    yes
C18 . C19 . H191 . 110.5    no
P2 . C19 . H191 . 108.0    no
C18 . C19 . H192 . 110.9    no
P2 . C19 . H192 . 108.3    no
H191 . C19 . H192 . 109.8    no
P2 . C20 . C21 . 113.3(3)    yes
P2 . C20 . C24 . 116.9(3)    yes
C21 . C20 . C24 . 102.8(4)    yes
P2 . C20 . H201 . 107.6    no
C21 . C20 . H201 . 108.1    no
C24 . C20 . H201 . 107.8    no
C20 . C21 . C22 . 105.3(4)    yes
C20 . C21 . H211 . 112.0    no
C22 . C21 . H211 . 111.3    no
C20 . C21 . H212 . 109.3    no
C22 . C21 . H212 . 109.4    no
H211 . C21 . H212 . 109.5    no
C21 . C22 . C23 . 105.8(4)    yes
C21 . C22 . H221 . 111.3    no
C23 . C22 . H221 . 110.5    no
C21 . C22 . H222 . 109.5    no
C23 . C22 . H222 . 109.9    no
H221 . C22 . H222 . 109.8    no
C22 . C23 . C24 . 104.4(4)    yes
C22 . C23 . H231 . 111.3    no
C24 . C23 . H231 . 110.6    no
C22 . C23 . H232 . 110.5    no
C24 . C23 . H232 . 110.5    no
H231 . C23 . H232 . 109.4    no
C20 . C24 . C23 . 101.8(4)    yes
C20 . C24 . H241 . 111.9    no
C23 . C24 . H241 . 112.3    no
C20 . C24 . H242 . 111.0    no
C23 . C24 . H242 . 110.6    no
H241 . C24 . H242 . 109.1    no
P2 . C25 . C26 . 116.6(3)    yes
P2 . C25 . C29 . 113.9(3)    yes
C26 . C25 . C29 . 103.9(4)    yes
P2 . C25 . H251 . 106.9    no
C26 . C25 . H251 . 107.3    no
C29 . C25 . H251 . 107.8    no
C25 . C26 . C27 . 101.2(4)    yes
C25 . C26 . H262 . 111.1    no
C27 . C26 . H262 . 110.7    no
C25 . C26 . H261 . 112.8    no
C27 . C26 . H261 . 111.6    no
H262 . C26 . H261 . 109.2    no
C26 . C27 . C28 . 103.9(4)    yes
C26 . C27 . H271 . 110.2    no
C28 . C27 . H271 . 110.7    no
C26 . C27 . H272 . 111.2    no
C28 . C27 . H272 . 110.9    no
H271 . C27 . H272 . 109.8    no
C27 . C28 . C29 . 105.8(4)    yes
C27 . C28 . H281 . 111.7    no
C29 . C28 . H281 . 111.3    no
C27 . C28 . H282 . 109.2    no
C29 . C28 . H282 . 110.2    no
H281 . C28 . H282 . 108.6    no
C28 . C29 . C25 . 105.2(4)    yes
C28 . C29 . H291 . 110.2    no
C25 . C29 . H291 . 110.6    no
C28 . C29 . H292 . 109.8    no
C25 . C29 . H292 . 110.8    no
H291 . C29 . H292 . 110.1    no
P1 . C108 . C109 . 114.5(5)    yes
P1 . C108 . C112 . 115.0(7)    yes
C109 . C108 . C112 . 103.16(10)    yes
P1 . C108 . H1081 . 109.4    no
C109 . C108 . H1081 . 114.0    no
C112 . C108 . H1081 . 99.9    no
C108 . C109 . C110 . 104.25(10)    yes
C108 . C109 . H1092 . 110.5    no
C110 . C109 . H1092 . 110.3    no
C108 . C109 . H1091 . 110.6    no
C110 . C109 . H1091 . 111.3    no
H1092 . C109 . H1091 . 109.8    no
C109 . C110 . C111 . 107.05(10)    yes
C109 . C110 . H1101 . 110.5    no
C111 . C110 . H1101 . 110.7    no
C109 . C110 . H1102 . 109.6    no
C111 . C110 . H1102 . 110.0    no
H1101 . C110 . H1102 . 109.0    no
C110 . C111 . C112 . 105.54(10)    yes
C110 . C111 . H1112 . 110.2    no
C112 . C111 . H1112 . 110.4    no
C110 . C111 . H1111 . 111.1    no
C112 . C111 . H1111 . 110.2    no
H1112 . C111 . H1111 . 109.4    no
C108 . C112 . C111 . 101.27(10)    yes
C108 . C112 . H1122 . 111.7    no
C111 . C112 . H1122 . 111.4    no
C108 . C112 . H1121 . 111.7    no
C111 . C112 . H1121 . 110.9    no
H1122 . C112 . H1121 . 109.5    no
C16 . C115 . C14 . 104.03(7)    yes
C16 . C115 . H1152 . 110.6    no
C14 . C115 . H1152 . 111.0    no
C16 . C115 . H1151 . 110.8    no
C14 . C115 . H1151 . 110.9    no
H1152 . C115 . H1151 . 109.5    no
C30 . B1 . C38 . 113.0(3)    yes
C30 . B1 . C46 . 105.7(3)    yes
C38 . B1 . C46 . 111.6(3)    yes
C30 . B1 . C54 . 112.6(3)    yes
C38 . B1 . C54 . 102.6(3)    yes
C46 . B1 . C54 . 111.6(3)    yes
B1 . C30 . C31 . 122.0(4)    yes
B1 . C30 . C35 . 122.4(4)    yes
C31 . C30 . C35 . 115.5(4)    yes
C30 . C31 . C32 . 122.9(4)    yes
C30 . C31 . H311 . 118.7    no
C32 . C31 . H311 . 118.5    no
C31 . C32 . C33 . 120.6(3)    yes
C31 . C32 . C36 . 118.6(3)    yes
C33 . C32 . C36 . 120.6(3)    yes
C32 . C33 . C34 . 117.9(4)    yes
C32 . C33 . H331 . 120.9    no
C34 . C33 . H331 . 121.2    no
C33 . C34 . C35 . 121.2(3)    yes
C33 . C34 . C37 . 120.4(3)    yes
C35 . C34 . C37 . 118.4(3)    yes
C30 . C35 . C34 . 121.8(4)    yes
C30 . C35 . H351 . 119.6    no
C34 . C35 . H351 . 118.6    no
C32 . C36 . F1 . 112.71(5)    yes
C32 . C36 . F2 . 112.62(5)    yes
F1 . C36 . F2 . 106.13(5)    yes
C32 . C36 . F3 . 112.67(5)    yes
F1 . C36 . F3 . 106.11(5)    yes
F2 . C36 . F3 . 106.05(5)    yes
C32 . C36 . F101 . 112.65(5)    yes
C32 . C36 . F102 . 112.69(5)    yes
F101 . C36 . F102 . 106.14(5)    yes
C32 . C36 . F103 . 112.61(5)    yes
F101 . C36 . F103 . 106.08(5)    yes
F102 . C36 . F103 . 106.11(5)    yes
C34 . C37 . F4 . 112.65(5)    yes
C34 . C37 . F5 . 112.65(5)    yes
F4 . C37 . F5 . 106.07(5)    yes
C34 . C37 . F6 . 112.66(5)    yes
F4 . C37 . F6 . 106.12(5)    yes
F5 . C37 . F6 . 106.13(5)    yes
C34 . C37 . F104 . 112.66(5)    yes
C34 . C37 . F105 . 112.63(5)    yes
F104 . C37 . F105 . 106.09(5)    yes
C34 . C37 . F106 . 112.67(5)    yes
F104 . C37 . F106 . 106.13(5)    yes
F105 . C37 . F106 . 106.11(5)    yes
B1 . C38 . C39 . 122.3(4)    yes
B1 . C38 . C43 . 121.3(4)    yes
C39 . C38 . C43 . 115.9(4)    yes
C38 . C39 . C40 . 122.0(4)    yes
C38 . C39 . H391 . 118.4    no
C40 . C39 . H391 . 119.6    no
C39 . C40 . C41 . 121.0(3)    yes
C39 . C40 . C44 . 122.2(3)    yes
C41 . C40 . C44 . 116.7(3)    yes
C40 . C41 . C42 . 117.9(4)    yes
C40 . C41 . H411 . 121.1    no
C42 . C41 . H411 . 121.0    no
C41 . C42 . C43 . 120.8(4)    yes
C41 . C42 . C45 . 120.6(3)    yes
C43 . C42 . C45 . 118.6(3)    yes
C38 . C43 . C42 . 122.3(4)    yes
C38 . C43 . H431 . 119.1    no
C42 . C43 . H431 . 118.6    no
C40 . C44 . F7 . 112.64(5)    yes
C40 . C44 . F8 . 112.71(5)    yes
F7 . C44 . F8 . 106.13(5)    yes
C40 . C44 . F9 . 112.64(5)    yes
F7 . C44 . F9 . 106.06(5)    yes
F8 . C44 . F9 . 106.11(5)    yes
C40 . C44 . F107 . 112.63(5)    yes
C40 . C44 . F108 . 112.63(5)    yes
F107 . C44 . F108 . 106.09(5)    yes
C40 . C44 . F109 . 112.71(5)    yes
F107 . C44 . F109 . 106.12(5)    yes
F108 . C44 . F109 . 106.10(5)    yes
C42 . C45 . F10 . 112.66(5)    yes
C42 . C45 . F11 . 112.66(5)    yes
F10 . C45 . F11 . 106.13(5)    yes
C42 . C45 . F12 . 112.64(5)    yes
F10 . C45 . F12 . 106.10(5)    yes
F11 . C45 . F12 . 106.10(5)    yes
C42 . C45 . F110 . 112.64(5)    yes
C42 . C45 . F111 . 112.67(5)    yes
F110 . C45 . F111 . 106.10(5)    yes
C42 . C45 . F112 . 112.65(5)    yes
F110 . C45 . F112 . 106.10(5)    yes
F111 . C45 . F112 . 106.12(5)    yes
B1 . C46 . C47 . 121.9(3)    yes
B1 . C46 . C51 . 122.4(4)    yes
C47 . C46 . C51 . 115.6(4)    yes
C46 . C47 . C48 . 122.5(4)    yes
C46 . C47 . H471 . 119.3    no
C48 . C47 . H471 . 118.3    no
C47 . C48 . C49 . 120.5(4)    yes
C47 . C48 . C52 . 119.4(4)    yes
C49 . C48 . C52 . 119.9(4)    yes
C48 . C49 . C50 . 118.2(4)    yes
C48 . C49 . H491 . 120.5    no
C50 . C49 . H491 . 121.3    no
C49 . C50 . C51 . 121.1(4)    yes
C49 . C50 . C53 . 120.6(4)    yes
C51 . C50 . C53 . 118.3(4)    yes
C46 . C51 . C50 . 122.0(4)    yes
C46 . C51 . H511 . 118.6    no
C50 . C51 . H511 . 119.4    no
C48 . C52 . F13 . 112.4(4)    yes
C48 . C52 . F14 . 112.7(4)    yes
F13 . C52 . F14 . 106.2(4)    yes
C48 . C52 . F15 . 111.7(4)    yes
F13 . C52 . F15 . 107.2(4)    yes
F14 . C52 . F15 . 106.2(4)    yes
C50 . C53 . F16 . 111.8(4)    yes
C50 . C53 . F17 . 112.6(4)    yes
F16 . C53 . F17 . 105.8(4)    yes
C50 . C53 . F18 . 112.2(4)    yes
F16 . C53 . F18 . 106.6(4)    yes
F17 . C53 . F18 . 107.4(4)    yes
B1 . C54 . C55 . 121.2(4)    yes
B1 . C54 . C59 . 122.8(4)    yes
C55 . C54 . C59 . 115.6(4)    yes
C54 . C55 . C56 . 122.2(4)    yes
C54 . C55 . H551 . 118.8    no
C56 . C55 . H551 . 118.9    no
C55 . C56 . C57 . 121.2(4)    yes
C55 . C56 . C60 . 119.6(4)    yes
C57 . C56 . C60 . 119.2(4)    yes
C56 . C57 . C58 . 117.6(4)    yes
C56 . C57 . H571 . 121.0    no
C58 . C57 . H571 . 121.5    no
C57 . C58 . C59 . 121.0(3)    yes
C57 . C58 . C61 . 120.0(3)    yes
C59 . C58 . C61 . 119.0(3)    yes
C54 . C59 . C58 . 122.3(4)    yes
C54 . C59 . H591 . 119.1    no
C58 . C59 . H591 . 118.6    no
C56 . C60 . F19 . 111.9(4)    yes
C56 . C60 . F20 . 111.7(4)    yes
F19 . C60 . F20 . 104.3(4)    yes
C56 . C60 . F21 . 113.9(4)    yes
F19 . C60 . F21 . 106.7(5)    yes
F20 . C60 . F21 . 107.7(5)    yes
C58 . C61 . F22 . 112.65(5)    yes
C58 . C61 . F23 . 112.67(5)    yes
F22 . C61 . F23 . 106.12(5)    yes
C58 . C61 . F24 . 112.65(5)    yes
F22 . C61 . F24 . 106.10(5)    yes
F23 . C61 . F24 . 106.10(5)    yes
C58 . C61 . F122 . 112.65(5)    yes
C58 . C61 . F123 . 112.66(5)    yes
F122 . C61 . F123 . 106.10(5)    yes
C58 . C61 . F124 . 112.66(5)    yes
F122 . C61 . F124 . 106.11(5)    yes
F123 . C61 . F124 . 106.10(5)    yes


_iucr_refine_instructions_details
;
#
# Punched on 01/08/16 at 14:45:29
#
#LIST     12                                                                    
BLOCK SCALE X'S  U'S 
REM CONT H(11,X'S) UNTIL H(72) 
REM CONT H(11,X'S) H(12,X'S) H(21,X'S) H(22,X'S) 
EQUIV PART(1001, OCC) PART(1002, OCC) 
WEIGHT -1   PART(1002, OCC) 
EQUIV PART(2001, OCC) PART(2002, OCC) 
WEIGHT -1   PART(2002, OCC) 
EQUIV PART(3001, OCC) PART(3002, OCC) 
WEIGHT -1   PART(3002, OCC) 
EQUIV PART(4001, OCC) PART(4002, OCC) 
WEIGHT -1   PART(4002, OCC) 
EQUIV PART(5001, OCC) PART(5002, OCC) 
WEIGHT -1   PART(5002, OCC) 
EQUIV PART(6001, OCC) PART(6002, OCC) 
WEIGHT -1   PART(6002, OCC) 
EQUIV PART(7001, OCC) PART(7002, OCC) 
WEIGHT -1   PART(7002, OCC) 
RIDE C(8,U'S) C(108,U'S) 
RIDE C   (   1,X'S) H   (  11,X'S) H   (  12,X'S) 
RIDE C   (   2,X'S) H   (  21,X'S) H   (  22,X'S) 
RIDE C   (   3,X'S) H   (  31,X'S) 
RIDE C   (   4,X'S) H   (  41,X'S) H   (  42,X'S) 
RIDE C   (   5,X'S) H   (  51,X'S) H   (  52,X'S) 
RIDE C   (   6,X'S) H   (  61,X'S) 
RIDE C   (   7,X'S) H   (  71,X'S) H   (  72,X'S) 
RIDE C   (   8,X'S) H   (  81,X'S) 
CONT C   ( 108,X'S) H   (1081,X'S) 
RIDE C   (   9,X'S) H   (  91,X'S) H   (  92,X'S) 
RIDE C   (  10,X'S) H   ( 101,X'S) H   ( 102,X'S) 
RIDE C   (  11,X'S) H   ( 111,X'S) H   ( 112,X'S) 
RIDE C   (  12,X'S) H   ( 121,X'S) H   ( 122,X'S) 
RIDE C   (  13,X'S) H   ( 131,X'S) 
RIDE C   (  14,X'S) H   ( 141,X'S) H   ( 142,X'S) 
CONT H   ( 143,X'S) H   ( 144,X'S) 
RIDE C   (  15,X'S) H   ( 151,X'S) H   ( 152,X'S) 
RIDE C   (  16,X'S) H   ( 161,X'S) H   ( 162,X'S) 
CONT H   ( 163,X'S) H   ( 164,X'S) 
RIDE C   (  17,X'S) H   ( 171,X'S) H   ( 172,X'S) 
RIDE C   (  18,X'S) H   ( 181,X'S) H   ( 182,X'S) 
RIDE C   (  19,X'S) H   ( 191,X'S) H   ( 192,X'S) 
RIDE C   (  20,X'S) H   ( 201,X'S) 
RIDE C   (  21,X'S) H   ( 211,X'S) H   ( 212,X'S) 
RIDE C   (  22,X'S) H   ( 221,X'S) H   ( 222,X'S) 
RIDE C   (  23,X'S) H   ( 231,X'S) H   ( 232,X'S) 
RIDE C   (  24,X'S) H   ( 241,X'S) H   ( 242,X'S) 
RIDE C   (  25,X'S) H   ( 251,X'S) 
RIDE C   (  26,X'S) H   ( 261,X'S) H   ( 262,X'S) 
RIDE C   (  27,X'S) H   ( 271,X'S) H   ( 272,X'S) 
RIDE C   (  28,X'S) H   ( 281,X'S) H   ( 282,X'S) 
RIDE C   (  29,X'S) H   ( 291,X'S) H   ( 292,X'S) 
RIDE C   ( 109,X'S) H   (1091,X'S) H   (1092,X'S) 
RIDE C   ( 110,X'S) H   (1101,X'S) H   (1102,X'S) 
RIDE C   ( 111,X'S) H   (1111,X'S) H   (1112,X'S) 
RIDE C   ( 112,X'S) H   (1121,X'S) H   (1122,X'S) 
RIDE C   ( 115,X'S) H   (1151,X'S) H   (1152,X'S) 
RIDE C   (  31,X'S) H   ( 311,X'S) 
RIDE C   (  33,X'S) H   ( 331,X'S) 
RIDE C   (  35,X'S) H   ( 351,X'S) 
RIDE C   (  39,X'S) H   ( 391,X'S) 
RIDE C   (  41,X'S) H   ( 411,X'S) 
RIDE C   (  43,X'S) H   ( 431,X'S) 
RIDE C   (  47,X'S) H   ( 471,X'S) 
RIDE C   (  49,X'S) H   ( 491,X'S) 
RIDE C   (  51,X'S) H   ( 511,X'S) 
RIDE C   (  55,X'S) H   ( 551,X'S) 
RIDE C   (  57,X'S) H   ( 571,X'S) 
RIDE C   (  59,X'S) H   ( 591,X'S) 
END                                                                             
#
# Punched on 01/08/16 at 14:45:29
#
#LIST     16                                                                    
SAME  C(14)  C(15)  C(16) AND 
CONT  C(16)  C(15)  C(14) AND 
CONT  C(14)  C(115)  C(16) AND 
CONT  C(16)  C(115)  C(14) 
SIMU  C(14)  C(15)  C(16) AND 
CONT  C(16)  C(15)  C(14) AND 
CONT  C(14)  C(115)  C(16) AND 
CONT  C(16)  C(115)  C(14) 
DELU  C(14)  C(15)  C(16) AND 
CONT  C(16)  C(15)  C(14) AND 
CONT  C(14)  C(115)  C(16) AND 
CONT  C(16)  C(115)  C(14) 
SAME  C(32)  C(36)  F(1)  F(2)  F(3) AND 
CONT  C(32)  C(36)  F(2)  F(3)  F(1) AND 
CONT  C(32)  C(36)  F(3)  F(1)  F(2) AND 
CONT  C(34)  C(37)  F(4)  F(5)  F(6) AND 
CONT  C(34)  C(37)  F(5)  F(6)  F(4) AND 
CONT  C(34)  C(37)  F(6)  F(4)  F(5) AND 
CONT  C(40)  C(44)  F(7)  F(8)  F(9) AND 
CONT  C(40)  C(44)  F(8)  F(9)  F(7) AND 
CONT  C(40)  C(44)  F(9)  F(7)  F(8) AND 
CONT  C(42)  C(45)  F(10)  F(11)  F(12) AND 
CONT  C(42)  C(45)  F(11)  F(12)  F(10) AND 
CONT  C(42)  C(45)  F(12)  F(10)  F(11) AND 
CONT  C(58)  C(61)  F(22)  F(23)  F(24) AND 
CONT  C(58)  C(61)  F(23)  F(24)  F(22) AND 
CONT  C(58)  C(61)  F(24)  F(22)  F(23) AND 
CONT  C(32)  C(36)  F(101)  F(102)  F(103) AND 
CONT  C(32)  C(36)  F(102)  F(103)  F(101) AND 
CONT  C(32)  C(36)  F(103)  F(101)  F(102) AND 
CONT  C(34)  C(37)  F(104)  F(105)  F(106) AND 
CONT  C(34)  C(37)  F(105)  F(106)  F(104) AND 
CONT  C(34)  C(37)  F(106)  F(104)  F(105) AND 
CONT  C(40)  C(44)  F(107)  F(108)  F(109) AND 
CONT  C(40)  C(44)  F(108)  F(109)  F(107) AND 
CONT  C(40)  C(44)  F(109)  F(107)  F(108) AND 
CONT  C(42)  C(45)  F(110)  F(111)  F(112) AND 
CONT  C(42)  C(45)  F(111)  F(112)  F(110) AND 
CONT  C(42)  C(45)  F(112)  F(110)  F(111) AND 
CONT  C(58)  C(61)  F(122)  F(123)  F(124) AND 
CONT  C(58)  C(61)  F(123)  F(124)  F(122) AND 
CONT  C(58)  C(61)  F(124)  F(122)  F(123) 
SIMU  0.01 C(32)  C(36)  F(1)  F(2)  F(3) AND 
CONT  C(32)  C(36)  F(2)  F(3)  F(1) AND 
CONT  C(32)  C(36)  F(3)  F(1)  F(2) AND 
CONT  C(34)  C(37)  F(4)  F(5)  F(6) AND 
CONT  C(34)  C(37)  F(5)  F(6)  F(4) AND 
CONT  C(34)  C(37)  F(6)  F(4)  F(5) AND 
CONT  C(40)  C(44)  F(7)  F(8)  F(9) AND 
CONT  C(40)  C(44)  F(8)  F(9)  F(7) AND 
CONT  C(40)  C(44)  F(9)  F(7)  F(8) AND 
CONT  C(42)  C(45)  F(10)  F(11)  F(12) AND 
CONT  C(42)  C(45)  F(11)  F(12)  F(10) AND 
CONT  C(42)  C(45)  F(12)  F(10)  F(11) AND 
CONT  C(58)  C(61)  F(22)  F(23)  F(24) AND 
CONT  C(58)  C(61)  F(23)  F(24)  F(22) AND 
CONT  C(58)  C(61)  F(24)  F(22)  F(23) AND 
CONT  C(32)  C(36)  F(101)  F(102)  F(103) AND 
CONT  C(32)  C(36)  F(102)  F(103)  F(101) AND 
CONT  C(32)  C(36)  F(103)  F(101)  F(102) AND 
CONT  C(34)  C(37)  F(104)  F(105)  F(106) AND 
CONT  C(34)  C(37)  F(105)  F(106)  F(104) AND 
CONT  C(34)  C(37)  F(106)  F(104)  F(105) AND 
CONT  C(40)  C(44)  F(107)  F(108)  F(109) AND 
CONT  C(40)  C(44)  F(108)  F(109)  F(107) AND 
CONT  C(40)  C(44)  F(109)  F(107)  F(108) AND 
CONT  C(42)  C(45)  F(110)  F(111)  F(112) AND 
CONT  C(42)  C(45)  F(111)  F(112)  F(110) AND 
CONT  C(42)  C(45)  F(112)  F(110)  F(111) AND 
CONT  C(58)  C(61)  F(122)  F(123)  F(124) AND 
CONT  C(58)  C(61)  F(123)  F(124)  F(122) AND 
CONT  C(58)  C(61)  F(124)  F(122)  F(123) 
DELU  0.01 C(32)  C(36)  F(1)  F(2)  F(3) AND 
CONT  C(32)  C(36)  F(2)  F(3)  F(1) AND 
CONT  C(32)  C(36)  F(3)  F(1)  F(2) AND 
CONT  C(34)  C(37)  F(4)  F(5)  F(6) AND 
CONT  C(34)  C(37)  F(5)  F(6)  F(4) AND 
CONT  C(34)  C(37)  F(6)  F(4)  F(5) AND 
CONT  C(40)  C(44)  F(7)  F(8)  F(9) AND 
CONT  C(40)  C(44)  F(8)  F(9)  F(7) AND 
CONT  C(40)  C(44)  F(9)  F(7)  F(8) AND 
CONT  C(42)  C(45)  F(10)  F(11)  F(12) AND 
CONT  C(42)  C(45)  F(11)  F(12)  F(10) AND 
CONT  C(42)  C(45)  F(12)  F(10)  F(11) AND 
CONT  C(58)  C(61)  F(22)  F(23)  F(24) AND 
CONT  C(58)  C(61)  F(23)  F(24)  F(22) AND 
CONT  C(58)  C(61)  F(24)  F(22)  F(23) AND 
CONT  C(32)  C(36)  F(101)  F(102)  F(103) AND 
CONT  C(32)  C(36)  F(102)  F(103)  F(101) AND 
CONT  C(32)  C(36)  F(103)  F(101)  F(102) AND 
CONT  C(34)  C(37)  F(104)  F(105)  F(106) AND 
CONT  C(34)  C(37)  F(105)  F(106)  F(104) AND 
CONT  C(34)  C(37)  F(106)  F(104)  F(105) AND 
CONT  C(40)  C(44)  F(107)  F(108)  F(109) AND 
CONT  C(40)  C(44)  F(108)  F(109)  F(107) AND 
CONT  C(40)  C(44)  F(109)  F(107)  F(108) AND 
CONT  C(42)  C(45)  F(110)  F(111)  F(112) AND 
CONT  C(42)  C(45)  F(111)  F(112)  F(110) AND 
CONT  C(42)  C(45)  F(112)  F(110)  F(111) AND 
CONT  C(58)  C(61)  F(122)  F(123)  F(124) AND 
CONT  C(58)  C(61)  F(123)  F(124)  F(122) AND 
CONT  C(58)  C(61)  F(124)  F(122)  F(123) 
SAME C(8) C(9) C(10) C(11) C(12) AND 
CONT C(108) C(109) C(110) C(111) C(112) 
SIMU 0.01 C(8) C(9) C(10) C(11) C(12) AND 
CONT C(108) C(109) C(110) C(111) C(112) 
DELU 0.01 C(8) C(9) C(10) C(11) C(12) AND 
CONT C(108) C(109) C(110) C(111) C(112) 
END                                                                             
;


#==============================================================================
data_3-BARF
#==============================================================================
_audit_creation_date        "2016-08-01"
_audit_creation_method CRYSTALS_ver_14.61_build_6019 

_oxford_structure_analysis_title  '6616 (053am16)'
_chemical_name_systematic         .
_chemical_melting_point           'not measured'

_cell_length_a                    12.9175(5)
_cell_length_b                    13.5653(4)
_cell_length_c                    17.2194(5)
_cell_angle_alpha                 93.738(2)
_cell_angle_beta                  99.900(3)
_cell_angle_gamma                 112.521(3)
_cell_volume                      2717.12(17)
 
_symmetry_cell_setting            'triclinic' 
_symmetry_space_group_name_H-M    'P -1 ' 
_symmetry_space_group_name_Hall   '-P 1' 
loop_
 _symmetry_equiv_pos_as_xyz
 'x,y,z'
 '-x,-y,-z'

loop_
_atom_type_symbol
_atom_type_scat_dispersion_real
_atom_type_scat_dispersion_imag
_atom_type_scat_Cromer_Mann_a1
_atom_type_scat_Cromer_Mann_b1
_atom_type_scat_Cromer_Mann_a2
_atom_type_scat_Cromer_Mann_b2
_atom_type_scat_Cromer_Mann_a3
_atom_type_scat_Cromer_Mann_b3
_atom_type_scat_Cromer_Mann_a4
_atom_type_scat_Cromer_Mann_b4
_atom_type_scat_Cromer_Mann_c
_atom_type_scat_source  
 C       0.0181   0.0091   2.3100  20.8439   1.0200  10.2075   1.5886   0.5687
   0.8650  51.6512   0.2156 'International Tables Vol C 4.2.6.8 and 6.1.1.4'
 H       0.0000   0.0000   0.4930  10.5109   0.3229  26.1257   0.1402   3.1424
   0.0408  57.7998   0.0030 'International Tables Vol C 4.2.6.8 and 6.1.1.4'
 B       0.0090   0.0039   2.0545  23.2185   1.3326   1.0210   1.0979  60.3498
   0.7068   0.1403  -0.1932 'International Tables Vol C 4.2.6.8 and 6.1.1.4'
 F       0.0727   0.0534   3.5392  10.2825   2.6412   4.2944   1.5170   0.2615
   1.0243  26.1476   0.2776 'International Tables Vol C 4.2.6.8 and 6.1.1.4'
 P       0.2955   0.4335   6.4345   1.9067   4.1791  27.1570   1.7800   0.5260
   1.4908  68.1645   1.1149 'International Tables Vol C 4.2.6.8 and 6.1.1.4'
 Rh      0.0927   3.6045  19.2957   0.7515  14.3501   8.2176   4.7343  25.8749
   1.2892  98.6062   5.3280 'International Tables Vol C 4.2.6.8 and 6.1.1.4'
 
 
_cell_formula_units_Z                    2

# Given Formula = C60 H67 B1 F36 P2 Rh1 
# Dc =      2.01 Fooo =   1662.00 Mu =     46.72 M =   1647.78
# Found Formula = C54.00 H52.00 B1 F24.00 P2 Rh1 
# Dc =      1.63 FOOO =   1344.00 Mu =     41.91 M =   1332.62

_chemical_formula_sum             'C54 H52 B1 F24 P2 Rh1'
_chemical_formula_moiety          'C54 H52 B1 F24 P2 Rh1'
_chemical_compound_source                .
_chemical_formula_weight           1332.62
 
 
_cell_measurement_reflns_used        12165
_cell_measurement_theta_min              4
_cell_measurement_theta_max             75
_cell_measurement_temperature          150
 
_exptl_crystal_description        'block' 
_exptl_crystal_colour             'clear_intense_orange' 
_exptl_crystal_size_min           0.22 
_exptl_crystal_size_mid           0.25 
_exptl_crystal_size_max           0.36 
 
_exptl_crystal_density_diffrn     1.629 
_exptl_crystal_density_meas       'not measured' 
_exptl_crystal_density_method     'not measured' 
# Non-dispersive F(000): 
_exptl_crystal_F_000              1344 
_exptl_absorpt_coefficient_mu     4.191 
 
# Sheldrick geometric approximatio 0.35 0.40 
_exptl_absorpt_correction_type    multi-scan 
_exptl_absorpt_process_details    'CrysAlisPro, (Agilent, 2011)' 
_exptl_absorpt_correction_T_min   0.27 
_exptl_absorpt_correction_T_max   0.40 
_diffrn_measurement_device_type   'Oxford Diffraction SuperNova' 
_diffrn_measurement_device        'Area' 
_diffrn_radiation_monochromator   'graphite' 
_diffrn_radiation_type            'Cu K\a'
_diffrn_radiation_wavelength           1.5418
_diffrn_measurement_method        \w 
 
# If a reference occurs more than once, delete the author 
# and date from subsequent references. 
_computing_data_collection        'SuperNova, (Oxford Diffraction, 2010)' 
_computing_cell_refinement        'CrysAlisPro, (Agilent, 2011)' 
_computing_data_reduction         'CrysAlisPro, (Agilent, 2011)' 
_computing_structure_solution     'SHELXT (Sheldrick, 2015)' 
_computing_structure_refinement   'CRYSTALS (Betteridge et al., 2003)' 
_computing_publication_material   'CRYSTALS (Betteridge et al., 2003)' 
_computing_molecular_graphics     'CAMERON (Watkin et al., 1996)' 
 
_diffrn_standards_interval_time   . 
_diffrn_standards_interval_count  . 
_diffrn_standards_number          0 
_diffrn_standards_decay_%         . 
 
_diffrn_ambient_temperature        150
_diffrn_reflns_number             20047 
_reflns_number_total              10764 
_diffrn_reflns_av_R_equivalents   0.034 
# Number of reflections without Friedels Law is 12631 
# Number of reflections with Friedels Law is 10764 
# Theoretical number of reflections is about 11227 
 
 
_diffrn_reflns_theta_min          3.564 
_diffrn_reflns_theta_max          75.214 
_diffrn_measured_fraction_theta_max 0.959 
 
_diffrn_reflns_theta_full         67.693 
_diffrn_measured_fraction_theta_full 0.996 
 
 
_diffrn_reflns_limit_h_min        -15 
_diffrn_reflns_limit_h_max        15 
_diffrn_reflns_limit_k_min        -16 
_diffrn_reflns_limit_k_max        16 
_diffrn_reflns_limit_l_min        -21 
_diffrn_reflns_limit_l_max        13 
_reflns_limit_h_min               -15 
_reflns_limit_h_max               15 
_reflns_limit_k_min               -16 
_reflns_limit_k_max               16 
_reflns_limit_l_min               0 
_reflns_limit_l_max               21 
 
_oxford_diffrn_Wilson_B_factor    0.00 
_oxford_diffrn_Wilson_scale       0.00 
 
_atom_sites_solution_primary      direct #heavy,direct,difmap,geom,iterative
# _atom_sites_solution_secondary  difmap
_atom_sites_solution_hydrogens    difmap
 
_refine_diff_density_min          -1.30 
_refine_diff_density_max          1.74 
 
 
# The current dictionary definitions do not cover the 
# situation where the reflections used for refinement were 
# selected by a user-defined sigma threshold 
 
 
# The values actually used during refinement 
_oxford_reflns_threshold_expression_ref     I>-3.0\s(I)
_refine_ls_number_reflns          10720 
_refine_ls_number_restraints      733 
_refine_ls_number_parameters      872 
_oxford_refine_ls_R_factor_ref    0.0560 
_refine_ls_wR_factor_ref          0.1387 
_refine_ls_goodness_of_fit_ref    1.0119 
_refine_ls_shift/su_max           0.0054156 
_refine_ls_shift/su_mean          0.0001022 
 
 
# The values computed with all filters except I/sigma 
_oxford_reflns_number_all         10720 
_refine_ls_R_factor_all           0.0560 
_refine_ls_wR_factor_all          0.1387 
 
# The values computed with a 2 sigma cutoff - a la SHELX 
_reflns_threshold_expression      I>2.0\s(I)
_reflns_number_gt                 10023 
_refine_ls_R_factor_gt            0.0533 
_refine_ls_wR_factor_gt           0.1356 
 
# choose from: rm (reference molecule of known chirality), 
# ad (anomolous dispersion - Flack), rmad (rm and ad), 
# syn (from synthesis), unk (unknown) or . (not applicable). 
_chemical_absolute_configuration  '.' 
 
 
_refine_ls_structure_factor_coef  Fsqd 
_refine_ls_matrix_type            full
_refine_ls_hydrogen_treatment     constr         #undef, noref, refall,
                                                 # refxyz, refU, constr or mixed
_refine_ls_weighting_scheme       calc 
_refine_ls_weighting_details 
;
 Method= Modified Sheldrick 
 w=1/[\s^2^(F^2^) + ( 0.07P)^2^ + 7.65P] 
 ,where P=(max(Fo^2^,0) + 2Fc^2^)/3 
;
# Insert your own references if required - in alphabetical order 
_publ_section_references 
; 
Betteridge, P.W., Carruthers, J.R., Cooper, R.I., 
Prout, K. & Watkin, D.J. (2003). J. Appl. Cryst. 36, 1487. 
 
Agilent (2011). CrysAlisPro. 
 
Oxford Diffraction, (2010). Supernova User Manual. 
 
Sheldrick, G.M. (2015). Acta Cryst. A71, 3-8. 
 
Watkin, D.J., Prout, C.K. & Pearce, L.J. (1996). CAMERON, Chemical 
Crystallography Laboratory, Oxford, UK. 
; 

# Uequiv = arithmetic mean of Ui i.e. Ueqiv = (U1+U2+U3)/3

# Replace last . with number of unfound hydrogen atoms attached to an atom.

# ..._refinement_flags_... 
# . no refinement constraints           S special position constraint on site
# G rigid group refinement of site      R riding atom
# D distance or angle restraint on site T thermal displacement constraints
# U Uiso or Uij restraint (rigid bond)  P partial occupancy constraint


loop_
_atom_site_label
_atom_site_type_symbol
_atom_site_fract_x
_atom_site_fract_y
_atom_site_fract_z
_atom_site_U_iso_or_equiv
_atom_site_occupancy
_atom_site_adp_type
_atom_site_refinement_flags_posn
_atom_site_refinement_flags_adp
_atom_site_refinement_flags_occupancy
_atom_site_disorder_assembly
_atom_site_disorder_group
_atom_site_attached_hydrogens
Rh1 Rh 0.29495(2) 0.221624(19) 0.789713(14) 0.0240 1.0000 Uani . U . . . . 
P1 P 0.23507(9) 0.04136(7) 0.76609(6) 0.0315 1.0000 Uani . . . . . . 
P2 P 0.10690(9) 0.18477(8) 0.75884(6) 0.0337 1.0000 Uani . U . . . . 
C1 C 0.3143(4) -0.0108(3) 0.7085(2) 0.0352 1.0000 Uani . . . . . . 
C2 C 0.3154(4) 0.0219(4) 0.6249(2) 0.0391 1.0000 Uani . . . . . . 
C3 C 0.3693(5) -0.0481(4) 0.5878(3) 0.0525 1.0000 Uani . . . . . . 
C4 C 0.3219(6) -0.1549(4) 0.6205(3) 0.0572 1.0000 Uani . . . . . . 
C5 C 0.2730(5) -0.1348(3) 0.6928(3) 0.0478 1.0000 Uani . . . . . . 
C6 C 0.2349(4) -0.0258(3) 0.8557(3) 0.0432 1.0000 Uani . . . . . . 
C7 C 0.3563(5) 0.0008(4) 0.9053(3) 0.0505 1.0000 Uani . . . . . . 
C8 C 0.3482(7) 0.0157(5) 0.9928(3) 0.0690 1.0000 Uani . . . . . . 
C9 C 0.2233(6) -0.0172(4) 0.9944(3) 0.0668 1.0000 Uani . . . . . . 
C10 C 0.1697(5) 0.0021(4) 0.9142(3) 0.0482 1.0000 Uani . . . . . . 
C11 C 0.0851(4) -0.0233(3) 0.7128(3) 0.0417 1.0000 Uani . . . . . . 
C12 C 0.0189(4) 0.0386(3) 0.7427(3) 0.0438 1.0000 Uani . U . . . . 
C13 C 0.0665(5) 0.2419(4) 0.8453(4) 0.0371 0.709(7) Uani D U P 1 1 . 
C14 C -0.0589(5) 0.1797(4) 0.8522(4) 0.0458 0.709(7) Uani D U P 1 1 . 
C15 C -0.0825(6) 0.2642(5) 0.9011(5) 0.0495 0.709(7) Uani D U P 1 1 . 
C16 C -0.0270(6) 0.3663(5) 0.8651(5) 0.0467 0.709(7) Uani D U P 1 1 . 
C17 C 0.0834(5) 0.3605(4) 0.8478(4) 0.0343 0.709(7) Uani D U P 1 1 . 
C18 C 0.0622(3) 0.2315(3) 0.6671(2) 0.0380 0.864(11) Uani D U P 2 1 . 
C19 C -0.0591(5) 0.2320(7) 0.6479(4) 0.0626 0.864(11) Uani D U P 2 1 . 
C20 C -0.0854(6) 0.2314(9) 0.5584(4) 0.0851 0.864(11) Uani D U P 2 1 . 
C21 C 0.0085(5) 0.2126(6) 0.5255(3) 0.0611 0.864(11) Uani D U P 2 1 . 
C22 C 0.0641(5) 0.1662(6) 0.5907(3) 0.0430 0.864(11) Uani D U P 2 1 . 
B1 B 0.3904(3) 0.5064(3) 0.7162(2) 0.0195 1.0000 Uani . . . . . . 
C23 C 0.3977(3) 0.4099(2) 0.76824(19) 0.0204 1.0000 Uani . . . . . . 
C24 C 0.4609(3) 0.3494(3) 0.7512(2) 0.0245 1.0000 Uani . . . . . . 
C25 C 0.4936(3) 0.2888(3) 0.8074(2) 0.0275 1.0000 Uani . . . . . . 
C26 C 0.4682(3) 0.2900(3) 0.8837(2) 0.0309 1.0000 Uani . . . . . . 
C27 C 0.4008(3) 0.3447(3) 0.9011(2) 0.0260 1.0000 Uani . . . . . . 
C28 C 0.3626(3) 0.3988(2) 0.84269(19) 0.0217 1.0000 Uani . . . . . . 
C29 C 0.5801(4) 0.2441(3) 0.7913(3) 0.0370 1.0000 Uani . . . . . . 
C30 C 0.3779(4) 0.3513(3) 0.9838(2) 0.0320 1.0000 Uani . . . . . . 
C31 C 0.3692(3) 0.4759(3) 0.61892(19) 0.0214 1.0000 Uani . . . . . . 
C32 C 0.3351(3) 0.3729(3) 0.5778(2) 0.0226 1.0000 Uani . . . . . . 
C33 C 0.3138(3) 0.3531(3) 0.4947(2) 0.0255 1.0000 Uani . . . . . . 
C34 C 0.3238(3) 0.4363(3) 0.4496(2) 0.0263 1.0000 Uani . . . . . . 
C35 C 0.3559(3) 0.5387(3) 0.4890(2) 0.0247 1.0000 Uani . . . . . . 
C36 C 0.3799(3) 0.5586(3) 0.5717(2) 0.0238 1.0000 Uani . . . . . . 
C37 C 0.2796(3) 0.2431(3) 0.4503(2) 0.0335 1.0000 Uani . . . . . . 
C38 C 0.3632(3) 0.6305(3) 0.4428(2) 0.0290 1.0000 Uani . . . . . . 
C39 C 0.5178(3) 0.6098(3) 0.74816(18) 0.0206 1.0000 Uani . . . . . . 
C40 C 0.5262(3) 0.7163(3) 0.74851(19) 0.0240 1.0000 Uani . . . . . . 
C41 C 0.6296(3) 0.8051(3) 0.7726(2) 0.0295 1.0000 Uani . . . . . . 
C42 C 0.7302(3) 0.7922(3) 0.7986(2) 0.0327 1.0000 Uani . . . . . . 
C43 C 0.7257(3) 0.6886(3) 0.7988(2) 0.0360 1.0000 Uani D . . . . . 
C44 C 0.6215(3) 0.5994(3) 0.7743(2) 0.0254 1.0000 Uani . . . . . . 
C45 C 0.6315(4) 0.9155(3) 0.7677(3) 0.0421 1.0000 Uani . . . . . . 
C46 C 0.83435(18) 0.6748(2) 0.82959(17) 0.0578 1.0000 Uani D . . . . . 
C47 C 0.2932(3) 0.5476(3) 0.73783(19) 0.0210 1.0000 Uani . . . . . . 
C48 C 0.1933(3) 0.5365(3) 0.6845(2) 0.0268 1.0000 Uani . . . . . . 
C49 C 0.1144(3) 0.5738(3) 0.7070(2) 0.0363 1.0000 Uani D . . . . . 
C50 C 0.1297(3) 0.6210(3) 0.7838(2) 0.0328 1.0000 Uani . . . . . . 
C51 C 0.2280(3) 0.6337(3) 0.8373(2) 0.0273 1.0000 Uani . . . . . . 
C52 C 0.3085(3) 0.5999(3) 0.8144(2) 0.0231 1.0000 Uani . . . . . . 
C53 C 0.00933(18) 0.5637(2) 0.64878(14) 0.0542 1.0000 Uani D . . . . . 
C54 C 0.2489(4) 0.6816(3) 0.9223(2) 0.0360 1.0000 Uani . . . . . . 
F1 F 0.6848(2) 0.3238(2) 0.80610(18) 0.0500 1.0000 Uani . . . . . . 
F2 F 0.5847(3) 0.1697(2) 0.83699(18) 0.0533 1.0000 Uani . . . . . . 
F3 F 0.5585(2) 0.1996(2) 0.71611(16) 0.0440 1.0000 Uani . . . . . . 
F4 F 0.4746(3) 0.3966(3) 1.03781(14) 0.0562 1.0000 Uani . . . . . . 
F5 F 0.3183(3) 0.4103(3) 0.99336(16) 0.0644 1.0000 Uani . . . . . . 
F6 F 0.3198(3) 0.2561(2) 1.00345(16) 0.0698 1.0000 Uani . . . . . . 
F7 F 0.2799(2) 0.16897(18) 0.49743(14) 0.0444 1.0000 Uani . . . . . . 
F8 F 0.3490(3) 0.2418(2) 0.40108(15) 0.0471 1.0000 Uani . . . . . . 
F9 F 0.1740(2) 0.2060(2) 0.40407(18) 0.0597 1.0000 Uani . . . . . . 
F10 F 0.4653(2) 0.7113(2) 0.46089(19) 0.0598 1.0000 Uani . . . . . . 
F11 F 0.3411(3) 0.6004(2) 0.36405(14) 0.0467 1.0000 Uani . . . . . . 
F12 F 0.2876(2) 0.6711(2) 0.45480(16) 0.0471 1.0000 Uani . . . . . . 
F13 F 0.6249(4) 0.9395(3) 0.69447(19) 0.0785 1.0000 Uani . . . . . . 
F14 F 0.5437(3) 0.9271(2) 0.7927(2) 0.0743 1.0000 Uani . . . . . . 
F15 F 0.7243(4) 0.9931(2) 0.8122(2) 0.0828 1.0000 Uani . . . . . . 
F16 F 0.9001(5) 0.6892(9) 0.7781(4) 0.0813 0.380(8) Uani D . P 3 1 . 
F17 F 0.8985(5) 0.7438(7) 0.8946(5) 0.0797 0.380(8) Uani D . P 3 1 . 
F18 F 0.8164(3) 0.5792(5) 0.8487(6) 0.0717 0.380(8) Uani D . P 3 1 . 
F19 F -0.0073(3) 0.6548(3) 0.6505(3) 0.0712 0.799(7) Uani D . P 4 1 . 
F20 F 0.0123(3) 0.5374(5) 0.5744(2) 0.0913 0.799(7) Uani D . P 4 1 . 
F21 F -0.0851(3) 0.4900(3) 0.6616(3) 0.0707 0.799(7) Uani D . P 4 1 . 
F22 F 0.1774(3) 0.7271(3) 0.93408(19) 0.0709 1.0000 Uani . . . . . . 
F23 F 0.3548(3) 0.7594(2) 0.94814(17) 0.0553 1.0000 Uani . . . . . . 
F24 F 0.2424(4) 0.6107(2) 0.97245(16) 0.0701 1.0000 Uani . . . . . . 
C113 C 0.0108(13) 0.2258(9) 0.8103(6) 0.0371 0.291(7) Uani D U P 1 2 . 
C114 C 0.0218(11) 0.2003(9) 0.8963(7) 0.0387 0.291(7) Uani D U P 1 2 . 
C115 C -0.0322(15) 0.2699(12) 0.9346(8) 0.0495 0.291(7) Uani D U P 1 2 . 
C116 C 0.0114(17) 0.3742(10) 0.8993(9) 0.0509 0.291(7) Uani D U P 1 2 . 
C117 C 0.0372(14) 0.3468(9) 0.8197(8) 0.0400 0.291(7) Uani D U P 1 2 . 
C118 C 0.0622(3) 0.2315(3) 0.6671(2) 0.0380 0.136(11) Uani D U P 2 2 . 
C119 C -0.0652(13) 0.207(4) 0.6543(17) 0.0573 0.136(11) Uani D U P 2 2 . 
C120 C -0.1143(19) 0.166(4) 0.5655(16) 0.0703 0.136(11) Uani D U P 2 2 . 
C121 C -0.037(3) 0.114(3) 0.5408(14) 0.0670 0.136(11) Uani D U P 2 2 . 
C122 C 0.081(2) 0.182(4) 0.5923(17) 0.0452 0.136(11) Uani D U P 2 2 . 
F116 F 0.9243(3) 0.7479(4) 0.8119(4) 0.0669 0.620(8) Uani D . P 3 2 . 
F117 F 0.8578(4) 0.6804(7) 0.9073(3) 0.0927 0.620(8) Uani D . P 3 2 . 
F118 F 0.8317(3) 0.5803(4) 0.8007(4) 0.0821 0.620(8) Uani D . P 3 2 . 
F119 F 0.0268(4) 0.6455(8) 0.6088(7) 0.0731 0.201(7) Uani D . P 4 2 . 
F120 F -0.0314(9) 0.4760(8) 0.5942(7) 0.0630 0.201(7) Uani D . P 4 2 . 
F121 F -0.0757(6) 0.5576(13) 0.6827(3) 0.0734 0.201(7) Uani D . P 4 2 . 
H11 H 0.3934 0.0183 0.7392 0.0417 1.0000 Uiso R . . . . . 
H21 H 0.3605 0.0972 0.6272 0.0468 1.0000 Uiso R . . . . . 
H22 H 0.2380 0.0046 0.5963 0.0472 1.0000 Uiso R . . . . . 
H31 H 0.4524 -0.0145 0.6046 0.0630 1.0000 Uiso R . . . . . 
H32 H 0.3484 -0.0587 0.5302 0.0631 1.0000 Uiso R . . . . . 
H41 H 0.3826 -0.1793 0.6374 0.0690 1.0000 Uiso R . . . . . 
H42 H 0.2624 -0.2094 0.5796 0.0691 1.0000 Uiso R . . . . . 
H51 H 0.3006 -0.1627 0.7387 0.0568 1.0000 Uiso R . . . . . 
H52 H 0.1903 -0.1686 0.6800 0.0571 1.0000 Uiso R . . . . . 
H61 H 0.1989 -0.1031 0.8376 0.0517 1.0000 Uiso R . . . . . 
H71 H 0.3791 -0.0584 0.8950 0.0610 1.0000 Uiso R . . . . . 
H72 H 0.4120 0.0659 0.8924 0.0607 1.0000 Uiso R . . . . . 
H81 H 0.3791 -0.0286 1.0231 0.0828 1.0000 Uiso R . . . . . 
H82 H 0.3914 0.0912 1.0150 0.0828 1.0000 Uiso R . . . . . 
H91 H 0.2116 0.0242 1.0379 0.0796 1.0000 Uiso R . . . . . 
H92 H 0.1887 -0.0926 0.9988 0.0799 1.0000 Uiso R . . . . . 
H101 H 0.1806 0.0768 0.9157 0.0575 1.0000 Uiso R . . . . . 
H102 H 0.0890 -0.0434 0.8991 0.0577 1.0000 Uiso R . . . . . 
H111 H 0.0530 -0.0969 0.7219 0.0498 1.0000 Uiso R . . . . . 
H112 H 0.0822 -0.0208 0.6566 0.0498 1.0000 Uiso R . . . . . 
H121 H 0.0004 0.0174 0.7931 0.0531 1.0000 Uiso R . . . . . 
H122 H -0.0523 0.0218 0.7050 0.0530 1.0000 Uiso R . . . . . 
H131 H 0.1159 0.2362 0.8941 0.0452 0.709(7) Uiso R . P 1 1 . 
H141 H -0.0666 0.1177 0.8797 0.0549 0.709(7) Uiso R . P 1 1 . 
H142 H -0.1104 0.1558 0.8000 0.0549 0.709(7) Uiso R . P 1 1 . 
H151 H -0.0459 0.2749 0.9570 0.0592 0.709(7) Uiso R . P 1 1 . 
H152 H -0.1643 0.2441 0.8959 0.0588 0.709(7) Uiso R . P 1 1 . 
H161 H -0.0087 0.4305 0.9024 0.0561 0.709(7) Uiso R . P 1 1 . 
H162 H -0.0773 0.3668 0.8161 0.0563 0.709(7) Uiso R . P 1 1 . 
H171 H 0.1478 0.4050 0.8899 0.0412 0.709(7) Uiso R . P 1 1 . 
H172 H 0.0960 0.3845 0.7969 0.0410 0.709(7) Uiso R . P 1 1 . 
H181 H 0.1176 0.3055 0.6693 0.0462 0.864(11) Uiso R . P 2 1 . 
H191 H -0.0614 0.2950 0.6768 0.0750 0.864(11) Uiso R . P 2 1 . 
H192 H -0.1147 0.1670 0.6617 0.0748 0.864(11) Uiso R . P 2 1 . 
H201 H -0.0891 0.2991 0.5460 0.1020 0.864(11) Uiso R . P 2 1 . 
H202 H -0.1580 0.1721 0.5349 0.1022 0.864(11) Uiso R . P 2 1 . 
H211 H 0.0638 0.2793 0.5154 0.0732 0.864(11) Uiso R . P 2 1 . 
H212 H -0.0224 0.1625 0.4767 0.0730 0.864(11) Uiso R . P 2 1 . 
H221 H 0.0190 0.0906 0.5889 0.0520 0.864(11) Uiso R . P 2 1 . 
H222 H 0.1416 0.1759 0.5872 0.0517 0.864(11) Uiso R . P 2 1 . 
H241 H 0.4785 0.3441 0.6989 0.0291 1.0000 Uiso R . . . . . 
H261 H 0.4916 0.2482 0.9216 0.0372 1.0000 Uiso R . . . . . 
H281 H 0.3142 0.4337 0.8555 0.0259 1.0000 Uiso R . . . . . 
H321 H 0.3265 0.3144 0.6057 0.0265 1.0000 Uiso R . . . . . 
H341 H 0.3093 0.4231 0.3939 0.0304 1.0000 Uiso R . . . . . 
H361 H 0.4036 0.6299 0.5974 0.0278 1.0000 Uiso R . . . . . 
H401 H 0.4595 0.7280 0.7329 0.0291 1.0000 Uiso R . . . . . 
H421 H 0.7995 0.8523 0.8152 0.0391 1.0000 Uiso R . . . . . 
H441 H 0.6219 0.5300 0.7752 0.0309 1.0000 Uiso R . . . . . 
H481 H 0.1795 0.5036 0.6321 0.0322 1.0000 Uiso R . . . . . 
H501 H 0.0766 0.6445 0.7991 0.0388 1.0000 Uiso R . . . . . 
H521 H 0.3743 0.6119 0.8510 0.0280 1.0000 Uiso R . . . . . 
H1131 H -0.0688 0.1855 0.7815 0.0450 0.291(7) Uiso R . P 1 2 . 
H1141 H 0.1016 0.2219 0.9226 0.0460 0.291(7) Uiso R . P 1 2 . 
H1142 H -0.0202 0.1242 0.8979 0.0460 0.291(7) Uiso R . P 1 2 . 
H1151 H -0.0070 0.2836 0.9921 0.0590 0.291(7) Uiso R . P 1 2 . 
H1152 H -0.1155 0.2354 0.9201 0.0591 0.291(7) Uiso R . P 1 2 . 
H1161 H 0.0804 0.4258 0.9347 0.0611 0.291(7) Uiso R . P 1 2 . 
H1162 H -0.0462 0.4039 0.8916 0.0611 0.291(7) Uiso R . P 1 2 . 
H1171 H 0.1172 0.3877 0.8195 0.0480 0.291(7) Uiso R . P 1 2 . 
H1172 H -0.0109 0.3626 0.7767 0.0479 0.291(7) Uiso R . P 1 2 . 
H1181 H 0.1047 0.3098 0.6734 0.0460 0.136(11) Uiso R . P 2 2 . 
H1191 H -0.0764 0.2717 0.6687 0.0680 0.136(11) Uiso R . P 2 2 . 
H1192 H -0.1022 0.1522 0.6858 0.0680 0.136(11) Uiso R . P 2 2 . 
H1201 H -0.1926 0.1134 0.5571 0.0840 0.136(11) Uiso R . P 2 2 . 
H1202 H -0.1119 0.2250 0.5354 0.0840 0.136(11) Uiso R . P 2 2 . 
H1211 H -0.0621 0.0400 0.5521 0.0800 0.136(11) Uiso R . P 2 2 . 
H1212 H -0.0362 0.1142 0.4846 0.0800 0.136(11) Uiso R . P 2 2 . 
H1221 H 0.1243 0.1381 0.6056 0.0540 0.136(11) Uiso R . P 2 2 . 
H1222 H 0.1231 0.2384 0.5639 0.0540 0.136(11) Uiso R . P 2 2 . 
loop_
_atom_site_aniso_label
_atom_site_aniso_U_11
_atom_site_aniso_U_22
_atom_site_aniso_U_33
_atom_site_aniso_U_23
_atom_site_aniso_U_13
_atom_site_aniso_U_12
Rh1 0.03349(16) 0.01813(14) 0.02118(14) 0.00487(9) 0.00922(10) 0.00933(11) 
P1 0.0444(5) 0.0190(4) 0.0298(5) 0.0047(3) 0.0115(4) 0.0098(4) 
P2 0.0335(5) 0.0269(4) 0.0438(5) 0.0093(4) 0.0229(4) 0.0084(4) 
C1 0.051(2) 0.0237(18) 0.0319(19) 0.0048(14) 0.0085(17) 0.0165(16) 
C2 0.053(2) 0.038(2) 0.033(2) 0.0078(16) 0.0116(18) 0.0243(19) 
C3 0.073(3) 0.063(3) 0.036(2) 0.001(2) 0.013(2) 0.044(3) 
C4 0.096(4) 0.048(3) 0.038(2) -0.005(2) -0.001(2) 0.049(3) 
C5 0.064(3) 0.027(2) 0.051(3) 0.0023(18) 0.008(2) 0.019(2) 
C6 0.068(3) 0.0225(18) 0.039(2) 0.0118(16) 0.020(2) 0.0132(19) 
C7 0.080(3) 0.039(2) 0.041(2) 0.0204(19) 0.017(2) 0.029(2) 
C8 0.110(5) 0.074(4) 0.038(3) 0.008(2) 0.011(3) 0.056(4) 
C9 0.125(6) 0.046(3) 0.040(3) 0.017(2) 0.033(3) 0.037(3) 
C10 0.069(3) 0.030(2) 0.043(2) 0.0118(18) 0.025(2) 0.011(2) 
C11 0.046(2) 0.0255(19) 0.047(2) 0.0015(17) 0.0131(19) 0.0065(17) 
C12 0.040(2) 0.0279(15) 0.058(3) 0.0042(13) 0.024(2) 0.0027(16) 
C13 0.0289(16) 0.0329(16) 0.0468(16) 0.0025(16) 0.0200(17) 0.0051(17) 
C14 0.031(2) 0.052(2) 0.049(3) 0.008(3) 0.024(2) 0.004(2) 
C15 0.030(3) 0.064(3) 0.060(4) 0.013(3) 0.027(3) 0.016(3) 
C16 0.031(3) 0.062(3) 0.059(4) 0.016(3) 0.022(3) 0.025(3) 
C17 0.027(3) 0.0383(17) 0.042(3) 0.006(2) 0.019(2) 0.014(2) 
C18 0.0236(13) 0.0447(18) 0.0488(12) 0.0125(12) 0.0152(11) 0.0128(15) 
C19 0.034(2) 0.076(5) 0.093(3) 0.029(4) 0.023(3) 0.031(3) 
C20 0.042(3) 0.126(7) 0.095(3) 0.034(5) 0.003(3) 0.044(4) 
C21 0.043(3) 0.078(4) 0.0546(19) 0.014(3) -0.006(2) 0.023(3) 
C22 0.033(3) 0.049(4) 0.0436(16) 0.0071(19) 0.006(2) 0.013(2) 
B1 0.0208(16) 0.0205(16) 0.0207(17) 0.0055(13) 0.0083(13) 0.0101(13) 
C23 0.0187(14) 0.0182(14) 0.0235(15) 0.0049(12) 0.0061(12) 0.0056(12) 
C24 0.0263(16) 0.0240(16) 0.0251(16) 0.0053(13) 0.0078(13) 0.0106(13) 
C25 0.0284(17) 0.0259(17) 0.0323(18) 0.0052(14) 0.0070(14) 0.0150(14) 
C26 0.039(2) 0.0268(17) 0.0292(18) 0.0091(14) 0.0042(15) 0.0167(15) 
C27 0.0337(18) 0.0208(15) 0.0191(16) 0.0002(12) 0.0048(13) 0.0069(13) 
C28 0.0254(15) 0.0135(14) 0.0237(16) -0.0011(11) 0.0055(12) 0.0057(12) 
C29 0.043(2) 0.034(2) 0.043(2) 0.0125(17) 0.0108(17) 0.0238(18) 
C30 0.045(2) 0.0262(17) 0.0214(17) 0.0058(13) 0.0078(15) 0.0104(16) 
C31 0.0177(14) 0.0267(16) 0.0222(15) 0.0064(12) 0.0085(12) 0.0094(12) 
C32 0.0202(15) 0.0251(16) 0.0239(16) 0.0062(12) 0.0085(12) 0.0085(12) 
C33 0.0217(15) 0.0308(18) 0.0229(16) 0.0022(13) 0.0066(12) 0.0088(13) 
C34 0.0243(16) 0.0349(18) 0.0196(15) 0.0043(13) 0.0066(12) 0.0109(14) 
C35 0.0177(15) 0.0326(18) 0.0273(17) 0.0092(14) 0.0096(12) 0.0111(13) 
C36 0.0203(15) 0.0280(16) 0.0250(16) 0.0052(13) 0.0085(12) 0.0102(13) 
C37 0.038(2) 0.0340(19) 0.0258(18) 0.0020(15) 0.0070(15) 0.0112(16) 
C38 0.0242(16) 0.039(2) 0.0277(17) 0.0118(15) 0.0099(13) 0.0137(15) 
C39 0.0214(15) 0.0243(15) 0.0184(14) 0.0043(12) 0.0081(12) 0.0100(12) 
C40 0.0262(16) 0.0268(17) 0.0225(16) 0.0070(13) 0.0086(13) 0.0124(13) 
C41 0.0334(18) 0.0269(17) 0.0265(17) 0.0040(13) 0.0106(14) 0.0086(15) 
C42 0.0280(18) 0.0306(18) 0.0319(19) 0.0027(15) 0.0079(15) 0.0033(15) 
C43 0.0198(16) 0.045(2) 0.046(2) 0.0119(16) 0.0114(14) 0.0135(14) 
C44 0.0248(16) 0.0253(16) 0.0295(17) 0.0055(13) 0.0091(13) 0.0121(13) 
C45 0.052(3) 0.0273(19) 0.040(2) 0.0037(16) 0.0069(19) 0.0098(18) 
C46 0.0246(15) 0.068(2) 0.085(2) 0.0185(18) 0.0105(15) 0.0225(15) 
C47 0.0208(15) 0.0207(15) 0.0250(16) 0.0082(12) 0.0100(12) 0.0092(12) 
C48 0.0256(16) 0.0333(18) 0.0252(17) 0.0076(14) 0.0100(13) 0.0134(14) 
C49 0.0271(17) 0.054(2) 0.0395(19) 0.0169(17) 0.0124(14) 0.0252(16) 
C50 0.0302(18) 0.040(2) 0.043(2) 0.0144(17) 0.0206(16) 0.0225(16) 
C51 0.0330(18) 0.0256(16) 0.0308(18) 0.0093(14) 0.0167(14) 0.0148(14) 
C52 0.0245(16) 0.0250(16) 0.0240(16) 0.0085(13) 0.0107(13) 0.0113(13) 
C53 0.0356(16) 0.085(2) 0.0538(19) 0.0158(17) 0.0074(15) 0.0372(16) 
C54 0.048(2) 0.0318(19) 0.038(2) 0.0061(16) 0.0207(18) 0.0207(17) 
F1 0.0334(12) 0.0486(15) 0.0724(18) 0.0114(13) 0.0090(12) 0.0219(11) 
F2 0.0693(18) 0.0564(16) 0.0638(17) 0.0325(14) 0.0256(14) 0.0484(15) 
F3 0.0529(15) 0.0426(13) 0.0512(15) 0.0075(11) 0.0203(12) 0.0311(12) 
F4 0.0540(16) 0.078(2) 0.0237(12) -0.0001(12) -0.0009(11) 0.0170(14) 
F5 0.103(3) 0.094(2) 0.0326(13) 0.0207(14) 0.0326(15) 0.070(2) 
F6 0.113(3) 0.0361(14) 0.0359(14) 0.0055(11) 0.0340(16) -0.0042(15) 
F7 0.0689(17) 0.0274(11) 0.0334(12) 0.0036(9) 0.0150(11) 0.0140(11) 
F8 0.0687(17) 0.0443(14) 0.0341(12) 0.0007(10) 0.0240(12) 0.0241(13) 
F9 0.0468(15) 0.0484(16) 0.0614(18) -0.0173(13) -0.0167(13) 0.0107(12) 
F10 0.0354(13) 0.0498(16) 0.075(2) 0.0385(14) -0.0032(13) -0.0012(11) 
F11 0.0720(18) 0.0517(15) 0.0279(12) 0.0177(10) 0.0188(11) 0.0317(14) 
F12 0.0605(16) 0.0561(16) 0.0516(15) 0.0250(12) 0.0289(13) 0.0426(14) 
F13 0.147(4) 0.0543(18) 0.0512(18) 0.0253(15) 0.026(2) 0.055(2) 
F14 0.095(3) 0.0383(15) 0.112(3) 0.0129(16) 0.048(2) 0.0387(17) 
F15 0.097(3) 0.0250(13) 0.091(3) -0.0008(14) -0.022(2) 0.0053(15) 
F16 0.046(4) 0.103(5) 0.110(5) 0.017(4) 0.030(3) 0.041(4) 
F17 0.035(4) 0.072(4) 0.107(5) 0.005(4) -0.026(4) 0.013(3) 
F18 0.029(3) 0.071(4) 0.116(5) 0.043(4) 0.000(4) 0.023(3) 
F19 0.054(2) 0.083(3) 0.089(3) 0.029(2) -0.002(2) 0.045(2) 
F20 0.065(2) 0.186(5) 0.0423(19) 0.002(3) -0.0002(18) 0.078(3) 
F21 0.0284(16) 0.073(3) 0.092(3) 0.016(2) -0.0094(17) 0.0097(16) 
F22 0.078(2) 0.098(3) 0.0612(19) -0.0119(17) 0.0248(16) 0.061(2) 
F23 0.0604(17) 0.0502(16) 0.0440(15) -0.0099(12) 0.0125(13) 0.0119(13) 
F24 0.135(3) 0.0453(16) 0.0312(13) 0.0118(12) 0.0292(17) 0.0311(18) 
C113 0.0289(16) 0.0329(16) 0.0468(16) 0.0025(16) 0.0200(17) 0.0051(17) 
C114 0.025(6) 0.043(5) 0.048(3) 0.006(5) 0.023(4) 0.007(5) 
C115 0.035(7) 0.068(8) 0.050(6) 0.000(5) 0.022(6) 0.021(7) 
C116 0.048(9) 0.052(5) 0.051(8) -0.010(5) 0.007(7) 0.023(6) 
C117 0.028(7) 0.036(3) 0.058(7) 0.002(5) 0.017(6) 0.012(4) 
C118 0.0236(13) 0.0447(18) 0.0488(12) 0.0125(12) 0.0152(11) 0.0128(15) 
C119 0.022(4) 0.075(15) 0.071(10) 0.015(10) 0.015(7) 0.011(9) 
C120 0.029(8) 0.087(17) 0.074(11) 0.016(14) 0.002(7) 0.003(11) 
C121 0.041(12) 0.077(16) 0.057(11) 0.001(9) 0.007(8) -0.002(11) 
C122 0.032(8) 0.051(14) 0.043(3) 0.008(7) 0.016(8) 0.003(9) 
F116 0.0187(18) 0.058(3) 0.119(4) 0.019(3) 0.017(2) 0.0082(18) 
F117 0.048(3) 0.158(5) 0.081(3) 0.039(4) 0.013(3) 0.047(3) 
F118 0.033(2) 0.067(3) 0.146(5) 0.004(3) 0.004(3) 0.028(2) 
F119 0.052(5) 0.092(5) 0.065(6) 0.028(4) -0.009(5) 0.024(5) 
F120 0.042(5) 0.080(5) 0.057(5) 0.020(4) -0.013(5) 0.021(5) 
F121 0.040(4) 0.114(6) 0.067(5) 0.004(5) 0.013(4) 0.033(5) 

_refine_ls_extinction_method 
    'None'
_oxford_refine_ls_scale 0.3268(3) 
loop_
 _geom_bond_atom_site_label_1
 _geom_bond_site_symmetry_1
 _geom_bond_atom_site_label_2
 _geom_bond_site_symmetry_2
 _geom_bond_distance
 _geom_bond_publ_flag
Rh1 . P1 . 2.2487(9)    yes
Rh1 . P2 . 2.2415(11)    yes
Rh1 . C23 . 2.473(3)    yes
Rh1 . C24 . 2.415(3)    yes
Rh1 . C25 . 2.326(4)    yes
Rh1 . C26 . 2.335(4)    yes
Rh1 . C27 . 2.296(3)    yes
Rh1 . C28 . 2.281(3)    yes
P1 . C1 . 1.828(4)    yes
P1 . C6 . 1.842(4)    yes
P1 . C11 . 1.829(5)    yes
P2 . C12 . 1.843(4)    yes
P2 . C13 . 1.875(5)    yes
P2 . C18 . 1.825(4)    yes
P2 . C12 . 1.843(4)    yes
P2 . C18 . 1.825(4)    yes
P2 . C113 . 1.865(11)    yes
P2 . C12 . 1.843(4)    yes
P2 . C13 . 1.875(5)    yes
P2 . C118 . 1.825(4)    yes
P2 . C12 . 1.843(4)    yes
P2 . C113 . 1.865(11)    yes
P2 . C118 . 1.825(4)    yes
C1 . C2 . 1.534(5)    yes
C1 . C5 . 1.546(5)    yes
C1 . H11 . 0.979    no
C2 . C3 . 1.540(6)    yes
C2 . H21 . 0.957    no
C2 . H22 . 0.966    no
C3 . C4 . 1.529(8)    yes
C3 . H31 . 0.972    no
C3 . H32 . 0.968    no
C4 . C5 . 1.543(7)    yes
C4 . H41 . 0.971    no
C4 . H42 . 0.972    no
C5 . H51 . 0.970    no
C5 . H52 . 0.964    no
C6 . C7 . 1.544(7)    yes
C6 . C10 . 1.535(6)    yes
C6 . H61 . 0.972    no
C7 . C8 . 1.535(7)    yes
C7 . H71 . 0.972    no
C7 . H72 . 0.969    no
C8 . C9 . 1.506(10)    yes
C8 . H81 . 0.973    no
C8 . H82 . 0.971    no
C9 . C10 . 1.520(7)    yes
C9 . H91 . 0.974    no
C9 . H92 . 0.961    no
C10 . H101 . 0.966    no
C10 . H102 . 0.964    no
C11 . C12 . 1.532(6)    yes
C11 . H111 . 0.960    no
C11 . H112 . 0.964    no
C12 . H121 . 0.971    no
C12 . H122 . 0.968    no
C13 . C14 . 1.544(6)    yes
C13 . C17 . 1.536(6)    yes
C13 . H131 . 0.990    no
C14 . C15 . 1.532(7)    yes
C14 . H141 . 0.972    no
C14 . H142 . 0.974    no
C15 . C16 . 1.524(7)    yes
C15 . H151 . 0.971    no
C15 . H152 . 0.971    no
C16 . C17 . 1.536(6)    yes
C16 . H161 . 0.972    no
C16 . H162 . 0.974    no
C17 . H171 . 0.965    no
C17 . H172 . 0.972    no
C18 . C19 . 1.547(5)    yes
C18 . C22 . 1.547(6)    yes
C18 . H181 . 0.978    no
C19 . C20 . 1.517(7)    yes
C19 . H191 . 0.974    no
C19 . H192 . 0.976    no
C20 . C21 . 1.522(7)    yes
C20 . H201 . 0.973    no
C20 . H202 . 0.969    no
C21 . C22 . 1.528(7)    yes
C21 . H211 . 0.963    no
C21 . H212 . 0.965    no
C22 . H221 . 0.961    no
C22 . H222 . 0.971    no
B1 . C23 . 1.657(5)    yes
B1 . C31 . 1.649(5)    yes
B1 . C39 . 1.672(5)    yes
B1 . C47 . 1.643(4)    yes
C23 . C24 . 1.411(5)    yes
C23 . C28 . 1.430(5)    yes
C24 . C25 . 1.421(5)    yes
C24 . H241 . 0.971    no
C25 . C26 . 1.407(5)    yes
C25 . C29 . 1.516(5)    yes
C26 . C27 . 1.397(5)    yes
C26 . H261 . 0.975    no
C27 . C28 . 1.414(5)    yes
C27 . C30 . 1.507(5)    yes
C28 . H281 . 0.962    no
C29 . F1 . 1.337(5)    yes
C29 . F2 . 1.332(5)    yes
C29 . F3 . 1.328(5)    yes
C30 . F4 . 1.318(5)    yes
C30 . F5 . 1.326(5)    yes
C30 . F6 . 1.322(4)    yes
C31 . C32 . 1.392(5)    yes
C31 . C36 . 1.406(5)    yes
C32 . C33 . 1.398(5)    yes
C32 . H321 . 0.935    no
C33 . C34 . 1.388(5)    yes
C33 . C37 . 1.495(5)    yes
C34 . C35 . 1.379(5)    yes
C34 . H341 . 0.938    no
C35 . C36 . 1.390(5)    yes
C35 . C38 . 1.503(5)    yes
C36 . H361 . 0.946    no
C37 . F7 . 1.333(5)    yes
C37 . F8 . 1.339(5)    yes
C37 . F9 . 1.341(5)    yes
C38 . F10 . 1.321(4)    yes
C38 . F11 . 1.338(4)    yes
C38 . F12 . 1.329(4)    yes
C39 . C40 . 1.406(5)    yes
C39 . C44 . 1.402(5)    yes
C40 . C41 . 1.386(5)    yes
C40 . H401 . 0.933    no
C41 . C42 . 1.380(6)    yes
C41 . C45 . 1.495(5)    yes
C42 . C43 . 1.384(5)    yes
C42 . H421 . 0.933    no
C43 . C44 . 1.394(5)    yes
C43 . C46 . 1.498(3)    yes
C44 . H441 . 0.944    no
C45 . F13 . 1.319(5)    yes
C45 . F14 . 1.340(6)    yes
C45 . F15 . 1.321(5)    yes
C46 . F16 . 1.305(5)    yes
C46 . F17 . 1.328(5)    yes
C46 . F18 . 1.303(5)    yes
C46 . F116 . 1.305(4)    yes
C46 . F117 . 1.311(5)    yes
C46 . F118 . 1.331(5)    yes
C47 . C48 . 1.398(5)    yes
C47 . C52 . 1.401(5)    yes
C48 . C49 . 1.396(5)    yes
C48 . H481 . 0.936    no
C49 . C50 . 1.379(5)    yes
C49 . C53 . 1.496(3)    yes
C50 . C51 . 1.379(5)    yes
C50 . H501 . 0.927    no
C51 . C52 . 1.389(5)    yes
C51 . C54 . 1.497(5)    yes
C52 . H521 . 0.917    no
C53 . F19 . 1.332(4)    yes
C53 . F20 . 1.319(4)    yes
C53 . F21 . 1.313(4)    yes
C53 . F119 . 1.310(6)    yes
C53 . F120 . 1.334(6)    yes
C53 . F121 . 1.308(6)    yes
C54 . F22 . 1.327(5)    yes
C54 . F23 . 1.344(5)    yes
C54 . F24 . 1.323(5)    yes
C113 . C114 . 1.539(9)    yes
C113 . C117 . 1.535(8)    yes
C113 . H1131 . 0.980    no
C114 . C115 . 1.546(9)    yes
C114 . H1141 . 0.972    no
C114 . H1142 . 0.971    no
C115 . C116 . 1.521(9)    yes
C115 . H1151 . 0.969    no
C115 . H1152 . 0.973    no
C116 . C117 . 1.520(9)    yes
C116 . H1161 . 0.967    no
C116 . H1162 . 0.969    no
C117 . H1171 . 0.968    no
C117 . H1172 . 0.973    no
C118 . C119 . 1.520(9)    yes
C118 . C122 . 1.515(9)    yes
C118 . H1181 . 0.980    no
C119 . C120 . 1.527(10)    yes
C119 . H1191 . 0.969    no
C119 . H1192 . 0.970    no
C120 . C121 . 1.531(10)    yes
C120 . H1201 . 0.969    no
C120 . H1202 . 0.972    no
C121 . C122 . 1.525(10)    yes
C121 . H1211 . 0.968    no
C121 . H1212 . 0.970    no
C122 . H1221 . 0.969    no
C122 . H1222 . 0.970    no
loop_
 _geom_angle_atom_site_label_1
 _geom_angle_site_symmetry_1
 _geom_angle_atom_site_label_2
 _geom_angle_site_symmetry_2
 _geom_angle_atom_site_label_3
 _geom_angle_site_symmetry_3
 _geom_angle
 _geom_angle_publ_flag
P1 . Rh1 . P2 . 83.67(4)    yes
P1 . Rh1 . C23 . 155.72(8)    yes
P2 . Rh1 . C23 . 107.11(8)    yes
P1 . Rh1 . C24 . 124.86(9)    yes
P2 . Rh1 . C24 . 133.73(8)    yes
C23 . Rh1 . C24 . 33.53(11)    yes
P1 . Rh1 . C25 . 105.21(9)    yes
P2 . Rh1 . C25 . 168.43(9)    yes
C23 . Rh1 . C25 . 61.87(11)    yes
C24 . Rh1 . C25 . 34.81(12)    yes
P1 . Rh1 . C26 . 108.12(9)    yes
P2 . Rh1 . C26 . 149.33(10)    yes
C23 . Rh1 . C26 . 73.85(11)    yes
C24 . Rh1 . C26 . 62.52(12)    yes
C25 . Rh1 . C26 . 35.15(13)    yes
P1 . Rh1 . C27 . 131.85(9)    yes
P2 . Rh1 . C27 . 116.74(10)    yes
C23 . Rh1 . C27 . 63.28(11)    yes
C24 . Rh1 . C27 . 73.44(12)    yes
C25 . Rh1 . C27 . 62.89(13)    yes
P1 . Rh1 . C28 . 167.20(9)    yes
P2 . Rh1 . C28 . 99.37(9)    yes
C23 . Rh1 . C28 . 34.71(11)    yes
C24 . Rh1 . C28 . 61.30(11)    yes
C25 . Rh1 . C28 . 73.64(12)    yes
C26 . Rh1 . C27 . 35.10(13)    yes
C26 . Rh1 . C28 . 63.36(12)    yes
C27 . Rh1 . C28 . 35.98(12)    yes
Rh1 . P1 . C1 . 116.80(13)    yes
Rh1 . P1 . C6 . 115.11(14)    yes
C1 . P1 . C6 . 103.55(19)    yes
Rh1 . P1 . C11 . 111.60(14)    yes
C1 . P1 . C11 . 105.6(2)    yes
C6 . P1 . C11 . 102.8(2)    yes
Rh1 . P2 . C12 . 111.89(16)    yes
Rh1 . P2 . C13 . 108.87(19)    yes
C12 . P2 . C13 . 105.8(2)    yes
Rh1 . P2 . C18 . 114.00(12)    yes
C12 . P2 . C18 . 104.7(2)    yes
C13 . P2 . C18 . 111.2(2)    yes
Rh1 . P2 . C12 . 111.89(16)    yes
Rh1 . P2 . C18 . 114.00(12)    yes
C12 . P2 . C18 . 104.7(2)    yes
Rh1 . P2 . C113 . 133.0(4)    yes
C12 . P2 . C113 . 96.7(4)    yes
C18 . P2 . C113 . 92.2(4)    yes
Rh1 . P2 . C12 . 111.89(16)    yes
Rh1 . P2 . C13 . 108.87(19)    yes
C12 . P2 . C13 . 105.8(2)    yes
Rh1 . P2 . C118 . 114.00(12)    yes
C12 . P2 . C118 . 104.7(2)    yes
C13 . P2 . C118 . 111.2(2)    yes
Rh1 . P2 . C12 . 111.89(16)    yes
Rh1 . P2 . C113 . 133.0(4)    yes
C12 . P2 . C113 . 96.7(4)    yes
Rh1 . P2 . C118 . 114.00(12)    yes
C12 . P2 . C118 . 104.7(2)    yes
C113 . P2 . C118 . 92.2(4)    yes
P1 . C1 . C2 . 114.8(3)    yes
P1 . C1 . C5 . 116.5(3)    yes
C2 . C1 . C5 . 103.3(3)    yes
P1 . C1 . H11 . 106.0    no
C2 . C1 . H11 . 108.4    no
C5 . C1 . H11 . 107.4    no
C1 . C2 . C3 . 102.3(3)    yes
C1 . C2 . H21 . 111.5    no
C3 . C2 . H21 . 111.7    no
C1 . C2 . H22 . 110.0    no
C3 . C2 . H22 . 111.7    no
H21 . C2 . H22 . 109.5    no
C2 . C3 . C4 . 104.5(4)    yes
C2 . C3 . H31 . 110.3    no
C4 . C3 . H31 . 110.2    no
C2 . C3 . H32 . 111.5    no
C4 . C3 . H32 . 111.2    no
H31 . C3 . H32 . 109.1    no
C3 . C4 . C5 . 107.4(4)    yes
C3 . C4 . H41 . 110.4    no
C5 . C4 . H41 . 109.5    no
C3 . C4 . H42 . 110.0    no
C5 . C4 . H42 . 110.7    no
H41 . C4 . H42 . 108.8    no
C4 . C5 . C1 . 104.2(4)    yes
C4 . C5 . H51 . 111.6    no
C1 . C5 . H51 . 111.7    no
C4 . C5 . H52 . 110.5    no
C1 . C5 . H52 . 110.3    no
H51 . C5 . H52 . 108.5    no
P1 . C6 . C7 . 113.5(3)    yes
P1 . C6 . C10 . 114.3(3)    yes
C7 . C6 . C10 . 105.3(4)    yes
P1 . C6 . H61 . 107.0    no
C7 . C6 . H61 . 108.0    no
C10 . C6 . H61 . 108.6    no
C6 . C7 . C8 . 106.0(5)    yes
C6 . C7 . H71 . 110.1    no
C8 . C7 . H71 . 110.1    no
C6 . C7 . H72 . 111.0    no
C8 . C7 . H72 . 110.8    no
H71 . C7 . H72 . 108.9    no
C7 . C8 . C9 . 107.3(5)    yes
C7 . C8 . H81 . 110.6    no
C9 . C8 . H81 . 110.2    no
C7 . C8 . H82 . 108.7    no
C9 . C8 . H82 . 110.3    no
H81 . C8 . H82 . 109.7    no
C8 . C9 . C10 . 104.8(4)    yes
C8 . C9 . H91 . 112.6    no
C10 . C9 . H91 . 111.0    no
C8 . C9 . H92 . 110.1    no
C10 . C9 . H92 . 109.2    no
H91 . C9 . H92 . 109.1    no
C6 . C10 . C9 . 104.6(4)    yes
C6 . C10 . H101 . 110.1    no
C9 . C10 . H101 . 110.4    no
C6 . C10 . H102 . 110.8    no
C9 . C10 . H102 . 111.3    no
H101 . C10 . H102 . 109.5    no
P1 . C11 . C12 . 108.7(3)    yes
P1 . C11 . H111 . 109.7    no
C12 . C11 . H111 . 110.3    no
P1 . C11 . H112 . 108.6    no
C12 . C11 . H112 . 109.9    no
H111 . C11 . H112 . 109.6    no
C11 . C12 . P2 . 110.3(3)    yes
C11 . C12 . H121 . 109.8    no
P2 . C12 . H121 . 108.2    no
C11 . C12 . H122 . 110.2    no
P2 . C12 . H122 . 110.4    no
H121 . C12 . H122 . 108.0    no
P2 . C13 . C14 . 114.1(4)    yes
P2 . C13 . C17 . 115.6(4)    yes
C14 . C13 . C17 . 105.7(4)    yes
P2 . C13 . H131 . 106.6    no
C14 . C13 . H131 . 106.9    no
C17 . C13 . H131 . 107.5    no
C13 . C14 . C15 . 102.6(4)    yes
C13 . C14 . H141 . 111.0    no
C15 . C14 . H141 . 111.3    no
C13 . C14 . H142 . 111.2    no
C15 . C14 . H142 . 111.2    no
H141 . C14 . H142 . 109.4    no
C14 . C15 . C16 . 103.1(4)    yes
C14 . C15 . H151 . 111.5    no
C16 . C15 . H151 . 109.6    no
C14 . C15 . H152 . 111.1    no
C16 . C15 . H152 . 111.7    no
H151 . C15 . H152 . 109.7    no
C15 . C16 . C17 . 104.2(4)    yes
C15 . C16 . H161 . 111.2    no
C17 . C16 . H161 . 110.2    no
C15 . C16 . H162 . 110.5    no
C17 . C16 . H162 . 110.7    no
H161 . C16 . H162 . 109.9    no
C16 . C17 . C13 . 106.5(4)    yes
C16 . C17 . H171 . 109.7    no
C13 . C17 . H171 . 110.1    no
C16 . C17 . H172 . 110.3    no
C13 . C17 . H172 . 110.2    no
H171 . C17 . H172 . 110.0    no
P2 . C18 . C19 . 119.0(3)    yes
P2 . C18 . C22 . 113.8(4)    yes
C19 . C18 . C22 . 102.4(4)    yes
P2 . C18 . H181 . 106.7    no
C19 . C18 . H181 . 107.4    no
C22 . C18 . H181 . 106.8    no
C18 . C19 . C20 . 104.9(4)    yes
C18 . C19 . H191 . 111.5    no
C20 . C19 . H191 . 111.7    no
C18 . C19 . H192 . 110.0    no
C20 . C19 . H192 . 109.6    no
H191 . C19 . H192 . 109.0    no
C19 . C20 . C21 . 107.5(4)    yes
C19 . C20 . H201 . 110.9    no
C21 . C20 . H201 . 111.0    no
C19 . C20 . H202 . 109.5    no
C21 . C20 . H202 . 108.3    no
H201 . C20 . H202 . 109.6    no
C20 . C21 . C22 . 104.7(4)    yes
C20 . C21 . H211 . 110.8    no
C22 . C21 . H211 . 110.6    no
C20 . C21 . H212 . 111.6    no
C22 . C21 . H212 . 110.5    no
H211 . C21 . H212 . 108.6    no
C18 . C22 . C21 . 101.8(4)    yes
C18 . C22 . H221 . 110.7    no
C21 . C22 . H221 . 110.9    no
C18 . C22 . H222 . 111.9    no
C21 . C22 . H222 . 112.9    no
H221 . C22 . H222 . 108.6    no
C23 . B1 . C31 . 115.0(3)    yes
C23 . B1 . C39 . 104.9(2)    yes
C31 . B1 . C39 . 108.6(2)    yes
C23 . B1 . C47 . 111.1(2)    yes
C31 . B1 . C47 . 110.0(3)    yes
C39 . B1 . C47 . 106.8(3)    yes
B1 . C23 . Rh1 . 145.0(2)    yes
B1 . C23 . C24 . 121.7(3)    yes
Rh1 . C23 . C24 . 70.99(18)    yes
B1 . C23 . C28 . 121.8(3)    yes
Rh1 . C23 . C28 . 65.30(16)    yes
C24 . C23 . C28 . 115.1(3)    yes
Rh1 . C24 . C23 . 75.48(19)    yes
Rh1 . C24 . C25 . 69.18(19)    yes
C23 . C24 . C25 . 121.5(3)    yes
Rh1 . C24 . H241 . 124.4    no
C23 . C24 . H241 . 120.2    no
C25 . C24 . H241 . 118.1    no
Rh1 . C25 . C24 . 76.0(2)    yes
Rh1 . C25 . C26 . 72.8(2)    yes
C24 . C25 . C26 . 121.4(3)    yes
Rh1 . C25 . C29 . 135.8(3)    yes
C24 . C25 . C29 . 117.9(3)    yes
C26 . C25 . C29 . 119.2(3)    yes
Rh1 . C26 . C25 . 72.1(2)    yes
Rh1 . C26 . C27 . 70.9(2)    yes
C25 . C26 . C27 . 118.6(3)    yes
Rh1 . C26 . H261 . 123.9    no
C25 . C26 . H261 . 120.2    no
C27 . C26 . H261 . 121.0    no
Rh1 . C27 . C26 . 74.0(2)    yes
Rh1 . C27 . C28 . 71.44(18)    yes
C26 . C27 . C28 . 119.3(3)    yes
Rh1 . C27 . C30 . 129.8(2)    yes
C26 . C27 . C30 . 119.1(3)    yes
C28 . C27 . C30 . 121.5(3)    yes
Rh1 . C28 . C23 . 79.99(18)    yes
Rh1 . C28 . C27 . 72.57(18)    yes
C23 . C28 . C27 . 123.6(3)    yes
Rh1 . C28 . H281 . 123.6    no
C23 . C28 . H281 . 118.6    no
C27 . C28 . H281 . 117.6    no
C25 . C29 . F1 . 109.6(3)    yes
C25 . C29 . F2 . 112.4(3)    yes
F1 . C29 . F2 . 107.5(3)    yes
C25 . C29 . F3 . 112.8(3)    yes
F1 . C29 . F3 . 107.0(3)    yes
F2 . C29 . F3 . 107.2(3)    yes
C27 . C30 . F4 . 111.1(3)    yes
C27 . C30 . F5 . 112.7(3)    yes
F4 . C30 . F5 . 106.2(3)    yes
C27 . C30 . F6 . 113.2(3)    yes
F4 . C30 . F6 . 107.0(3)    yes
F5 . C30 . F6 . 106.1(4)    yes
B1 . C31 . C32 . 125.6(3)    yes
B1 . C31 . C36 . 118.3(3)    yes
C32 . C31 . C36 . 115.9(3)    yes
C31 . C32 . C33 . 122.1(3)    yes
C31 . C32 . H321 . 120.1    no
C33 . C32 . H321 . 117.9    no
C32 . C33 . C34 . 120.7(3)    yes
C32 . C33 . C37 . 122.2(3)    yes
C34 . C33 . C37 . 117.1(3)    yes
C33 . C34 . C35 . 118.3(3)    yes
C33 . C34 . H341 . 120.8    no
C35 . C34 . H341 . 120.9    no
C34 . C35 . C36 . 120.9(3)    yes
C34 . C35 . C38 . 120.3(3)    yes
C36 . C35 . C38 . 118.8(3)    yes
C31 . C36 . C35 . 122.1(3)    yes
C31 . C36 . H361 . 118.6    no
C35 . C36 . H361 . 119.2    no
C33 . C37 . F7 . 113.8(3)    yes
C33 . C37 . F8 . 112.2(3)    yes
F7 . C37 . F8 . 106.3(3)    yes
C33 . C37 . F9 . 112.1(3)    yes
F7 . C37 . F9 . 106.4(3)    yes
F8 . C37 . F9 . 105.5(3)    yes
C35 . C38 . F10 . 113.1(3)    yes
C35 . C38 . F11 . 112.4(3)    yes
F10 . C38 . F11 . 106.2(3)    yes
C35 . C38 . F12 . 112.0(3)    yes
F10 . C38 . F12 . 106.9(3)    yes
F11 . C38 . F12 . 105.8(3)    yes
B1 . C39 . C40 . 120.0(3)    yes
B1 . C39 . C44 . 124.7(3)    yes
C40 . C39 . C44 . 115.3(3)    yes
C39 . C40 . C41 . 122.6(3)    yes
C39 . C40 . H401 . 118.9    no
C41 . C40 . H401 . 118.4    no
C40 . C41 . C42 . 120.6(3)    yes
C40 . C41 . C45 . 119.1(4)    yes
C42 . C41 . C45 . 120.2(4)    yes
C41 . C42 . C43 . 118.5(3)    yes
C41 . C42 . H421 . 120.3    no
C43 . C42 . H421 . 121.2    no
C42 . C43 . C44 . 120.7(3)    yes
C42 . C43 . C46 . 118.4(3)    yes
C44 . C43 . C46 . 120.8(2)    yes
C39 . C44 . C43 . 122.2(3)    yes
C39 . C44 . H441 . 119.6    no
C43 . C44 . H441 . 118.2    no
C41 . C45 . F13 . 112.9(4)    yes
C41 . C45 . F14 . 112.3(4)    yes
F13 . C45 . F14 . 105.9(4)    yes
C41 . C45 . F15 . 113.5(4)    yes
F13 . C45 . F15 . 106.7(4)    yes
F14 . C45 . F15 . 104.9(4)    yes
C43 . C46 . F16 . 112.93(5)    yes
C43 . C46 . F17 . 112.88(5)    yes
F16 . C46 . F17 . 105.75(6)    yes
C43 . C46 . F18 . 113.03(5)    yes
F16 . C46 . F18 . 105.84(6)    yes
F17 . C46 . F18 . 105.76(6)    yes
C43 . C46 . F116 . 113.04(5)    yes
C43 . C46 . F117 . 112.95(5)    yes
F116 . C46 . F117 . 105.81(6)    yes
C43 . C46 . F118 . 112.90(5)    yes
F116 . C46 . F118 . 105.70(6)    yes
F117 . C46 . F118 . 105.78(6)    yes
B1 . C47 . C48 . 125.0(3)    yes
B1 . C47 . C52 . 119.8(3)    yes
C48 . C47 . C52 . 115.1(3)    yes
C47 . C48 . C49 . 122.0(3)    yes
C47 . C48 . H481 . 118.9    no
C49 . C48 . H481 . 119.2    no
C48 . C49 . C50 . 121.5(3)    yes
C48 . C49 . C53 . 121.4(3)    yes
C50 . C49 . C53 . 117.1(2)    yes
C49 . C50 . C51 . 117.7(3)    yes
C49 . C50 . H501 . 121.6    no
C51 . C50 . H501 . 120.7    no
C50 . C51 . C52 . 121.0(3)    yes
C50 . C51 . C54 . 120.6(3)    yes
C52 . C51 . C54 . 118.4(3)    yes
C47 . C52 . C51 . 122.7(3)    yes
C47 . C52 . H521 . 118.5    no
C51 . C52 . H521 . 118.8    no
C49 . C53 . F19 . 112.91(5)    yes
C49 . C53 . F20 . 112.96(5)    yes
F19 . C53 . F20 . 105.81(6)    yes
C49 . C53 . F21 . 112.94(5)    yes
F19 . C53 . F21 . 105.69(6)    yes
F20 . C53 . F21 . 105.87(6)    yes
C49 . C53 . F119 . 112.97(5)    yes
C49 . C53 . F120 . 112.91(5)    yes
F119 . C53 . F120 . 105.76(6)    yes
C49 . C53 . F121 . 112.98(5)    yes
F119 . C53 . F121 . 105.80(6)    yes
F120 . C53 . F121 . 105.76(6)    yes
C51 . C54 . F22 . 112.8(4)    yes
C51 . C54 . F23 . 112.6(3)    yes
F22 . C54 . F23 . 105.6(3)    yes
C51 . C54 . F24 . 112.9(3)    yes
F22 . C54 . F24 . 108.0(4)    yes
F23 . C54 . F24 . 104.2(4)    yes
P2 . C113 . C114 . 110.6(8)    yes
P2 . C113 . C117 . 115.3(8)    yes
C114 . C113 . C117 . 103.9(6)    yes
P2 . C113 . H1131 . 109.0    no
C114 . C113 . H1131 . 108.7    no
C117 . C113 . H1131 . 109.2    no
C113 . C114 . C115 . 102.0(6)    yes
C113 . C114 . H1141 . 111.3    no
C115 . C114 . H1141 . 111.2    no
C113 . C114 . H1142 . 111.3    no
C115 . C114 . H1142 . 111.5    no
H1141 . C114 . H1142 . 109.4    no
C114 . C115 . C116 . 103.7(6)    yes
C114 . C115 . H1151 . 111.4    no
C116 . C115 . H1151 . 110.6    no
C114 . C115 . H1152 . 110.9    no
C116 . C115 . H1152 . 110.4    no
H1151 . C115 . H1152 . 109.8    no
C115 . C116 . C117 . 106.9(5)    yes
C115 . C116 . H1161 . 109.6    no
C117 . C116 . H1161 . 110.2    no
C115 . C116 . H1162 . 110.3    no
C117 . C116 . H1162 . 110.2    no
H1161 . C116 . H1162 . 109.5    no
C113 . C117 . C116 . 106.4(5)    yes
C113 . C117 . H1171 . 109.9    no
C116 . C117 . H1171 . 110.4    no
C113 . C117 . H1172 . 110.3    no
C116 . C117 . H1172 . 110.2    no
H1171 . C117 . H1172 . 109.6    no
P2 . C118 . C119 . 109.3(18)    yes
P2 . C118 . C122 . 115(2)    yes
C119 . C118 . C122 . 107.3(5)    yes
P2 . C118 . H1181 . 108.0    no
C119 . C118 . H1181 . 108.6    no
C122 . C118 . H1181 . 108.3    no
C118 . C119 . C120 . 105.9(7)    yes
C118 . C119 . H1191 . 110.1    no
C120 . C119 . H1191 . 109.8    no
C118 . C119 . H1192 . 110.8    no
C120 . C119 . H1192 . 110.6    no
H1191 . C119 . H1192 . 109.5    no
C119 . C120 . C121 . 104.3(8)    yes
C119 . C120 . H1201 . 110.1    no
C121 . C120 . H1201 . 110.3    no
C119 . C120 . H1202 . 111.7    no
C121 . C120 . H1202 . 110.7    no
H1201 . C120 . H1202 . 109.6    no
C120 . C121 . C122 . 104.3(9)    yes
C120 . C121 . H1211 . 110.7    no
C122 . C121 . H1211 . 110.0    no
C120 . C121 . H1212 . 111.1    no
C122 . C121 . H1212 . 111.2    no
H1211 . C121 . H1212 . 109.5    no
C121 . C122 . C118 . 106.7(7)    yes
C121 . C122 . H1221 . 110.8    no
C118 . C122 . H1221 . 110.5    no
C121 . C122 . H1222 . 109.4    no
C118 . C122 . H1222 . 109.8    no
H1221 . C122 . H1222 . 109.6    no
loop_
 _geom_hbond_atom_site_label_D
 _geom_hbond_site_symmetry_D
 _geom_hbond_atom_site_label_H
 _geom_hbond_site_symmetry_H
 _geom_hbond_atom_site_label_A
 _geom_hbond_site_symmetry_A
 _geom_hbond_angle_DHA
 _geom_hbond_distance_DH
 _geom_hbond_distance_HA
 _geom_hbond_distance_DA
 _geom_hbond_publ_flag
C28 . H281 . C52 . 128 0.96 2.43 3.112(10)    yes
C44 . H441 . C24 . 131 0.94 2.48 3.180(10)    yes


_iucr_refine_instructions_details
;
#
# Punched on 01/08/16 at 17:50:05
#
#LIST     12                                                                    
BLOCK SCALE X'S  U'S 
EQUIV PART(1001, OCC) PART(1002, OCC) 
WEIGHT -1   PART(1002, OCC) 
EQUIV PART(2001, OCC) PART(2002, OCC) 
WEIGHT -1   PART(2002, OCC) 
EQUIV PART(3001, OCC) PART(3002, OCC) 
WEIGHT -1   PART(3002, OCC) 
EQUIV PART(4001, OCC) PART(4002, OCC) 
WEIGHT -1   PART(4002, OCC) 
RIDE C(13,U'S) C(113,U'S) 
RIDE C(18,U'S) C(118,U'S) 
RIDE C   (   1,X'S) H   (  11,X'S) 
RIDE C   (   2,X'S) H   (  21,X'S) H   (  22,X'S) 
RIDE C   (   3,X'S) H   (  31,X'S) H   (  32,X'S) 
RIDE C   (   4,X'S) H   (  41,X'S) H   (  42,X'S) 
RIDE C   (   5,X'S) H   (  51,X'S) H   (  52,X'S) 
RIDE C   (   6,X'S) H   (  61,X'S) 
RIDE C   (   7,X'S) H   (  71,X'S) H   (  72,X'S) 
RIDE C   (   8,X'S) H   (  81,X'S) H   (  82,X'S) 
RIDE C   (   9,X'S) H   (  91,X'S) H   (  92,X'S) 
RIDE C   (  10,X'S) H   ( 101,X'S) H   ( 102,X'S) 
RIDE C   (  11,X'S) H   ( 111,X'S) H   ( 112,X'S) 
RIDE C   (  12,X'S) H   ( 121,X'S) H   ( 122,X'S) 
RIDE C   (  13,X'S) H   ( 131,X'S) 
RIDE C   (  14,X'S) H   ( 141,X'S) H   ( 142,X'S) 
RIDE C   (  15,X'S) H   ( 151,X'S) H   ( 152,X'S) 
RIDE C   (  16,X'S) H   ( 161,X'S) H   ( 162,X'S) 
RIDE C   (  17,X'S) H   ( 171,X'S) H   ( 172,X'S) 
RIDE C   (  18,X'S) H   ( 181,X'S) 
CONT C   ( 118,X'S) H   (1181,X'S) 
RIDE C   (  19,X'S) H   ( 191,X'S) H   ( 192,X'S) 
RIDE C   (  20,X'S) H   ( 201,X'S) H   ( 202,X'S) 
RIDE C   (  21,X'S) H   ( 211,X'S) H   ( 212,X'S) 
RIDE C   (  22,X'S) H   ( 221,X'S) H   ( 222,X'S) 
RIDE C   (  24,X'S) H   ( 241,X'S) 
RIDE C   (  26,X'S) H   ( 261,X'S) 
RIDE C   (  28,X'S) H   ( 281,X'S) 
RIDE C   (  32,X'S) H   ( 321,X'S) 
RIDE C   (  34,X'S) H   ( 341,X'S) 
RIDE C   (  36,X'S) H   ( 361,X'S) 
RIDE C   (  40,X'S) H   ( 401,X'S) 
RIDE C   (  42,X'S) H   ( 421,X'S) 
RIDE C   (  44,X'S) H   ( 441,X'S) 
RIDE C   (  48,X'S) H   ( 481,X'S) 
RIDE C   (  50,X'S) H   ( 501,X'S) 
RIDE C   (  52,X'S) H   ( 521,X'S) 
RIDE C   ( 113,X'S) H   (1131,X'S) 
RIDE C   ( 114,X'S) H   (1141,X'S) H   (1142,X'S) 
RIDE C   ( 115,X'S) H   (1151,X'S) H   (1152,X'S) 
RIDE C   ( 116,X'S) H   (1161,X'S) H   (1162,X'S) 
RIDE C   ( 117,X'S) H   (1171,X'S) H   (1172,X'S) 
RIDE C   ( 119,X'S) H   (1191,X'S) H   (1192,X'S) 
RIDE C   ( 120,X'S) H   (1201,X'S) H   (1202,X'S) 
RIDE C   ( 121,X'S) H   (1211,X'S) H   (1212,X'S) 
RIDE C   ( 122,X'S) H   (1221,X'S) H   (1222,X'S) 
END                                                                             
#
# Punched on 01/08/16 at 17:50:05
#
#LIST     16                                                                    
DIST 0,0.01 = MEAN 
CONT C(13) TO C(14) C(14) TO C(15) C(15) TO C(16) 
CONT C(16) TO C(17) C(17) TO C(13) 
CONT C(18) TO C(19) C(19) TO C(20) C(20) TO C(21) 
CONT C(21) TO C(22) C(22) TO C(18) 
CONT C(113) TO C(114) C(114) TO C(115) C(115) TO C(116) 
CONT C(116) TO C(117) C(117) TO C(113) 
CONT C(118) TO C(119) C(119) TO C(120) C(120) TO C(121) 
CONT C(121) TO C(122) C(122) TO C(118) 
DIST 0,0.01 = MEAN 
CONT C(13) TO C(15) C(14) TO C(16) C(15) TO C(17) 
CONT C(16) TO C(13) C(17) TO C(14) 
CONT C(18) TO C(20) C(19) TO C(21) C(20) TO C(22) 
CONT C(21) TO C(18) C(22) TO C(19) 
CONT C(113) TO C(115) C(114) TO C(116) C(115) TO C(117) 
CONT C(116) TO C(113) C(117) TO C(114) 
CONT C(118) TO C(120) C(119) TO C(121) C(120) TO C(122) 
CONT C(121) TO C(118) C(122) TO C(119) 
VIBR .0, 0.00100 = P(2) TO C(13) 
VIBR .0, 0.00100 = P(2) TO C(18) 
VIBR .0, 0.00200 = C(13) TO RH(1) 
VIBR .0, 0.00200 = C(13) TO C(12) 
VIBR .0, 0.00200 = C(18) TO RH(1) 
VIBR .0, 0.00200 = C(18) TO C(12) 
VIBR .0, 0.00200 = C(18) TO C(13) 
VIBR .0, 0.00100 = P(2) TO C(113) 
VIBR .0, 0.00200 = C(18) TO RH(1) 
VIBR .0, 0.00200 = C(18) TO C(12) 
VIBR .0, 0.00200 = C(113) TO RH(1) 
VIBR .0, 0.00200 = C(113) TO C(12) 
VIBR .0, 0.00200 = C(113) TO C(18) 
VIBR .0, 0.00100 = P(2) TO C(13) 
VIBR .0, 0.00100 = P(2) TO C(118) 
VIBR .0, 0.00200 = C(13) TO RH(1) 
VIBR .0, 0.00200 = C(13) TO C(12) 
VIBR .0, 0.00200 = C(118) TO RH(1) 
VIBR .0, 0.00200 = C(118) TO C(12) 
VIBR .0, 0.00200 = C(118) TO C(13) 
VIBR .0, 0.00100 = P(2) TO C(113) 
VIBR .0, 0.00100 = P(2) TO C(118) 
VIBR .0, 0.00200 = C(113) TO RH(1) 
VIBR .0, 0.00200 = C(113) TO C(12) 
VIBR .0, 0.00200 = C(118) TO RH(1) 
VIBR .0, 0.00200 = C(118) TO C(12) 
VIBR .0, 0.00200 = C(118) TO C(113) 
VIBR .0, 0.00100 = C(13) TO C(14) 
VIBR .0, 0.00100 = C(13) TO C(17) 
VIBR .0, 0.00200 = C(14) TO P(2) 
VIBR .0, 0.00200 = C(17) TO P(2) 
VIBR .0, 0.00200 = C(17) TO C(14) 
VIBR .0, 0.00100 = C(14) TO C(15) 
VIBR .0, 0.00200 = C(15) TO C(13) 
VIBR .0, 0.00100 = C(15) TO C(16) 
VIBR .0, 0.00200 = C(16) TO C(14) 
VIBR .0, 0.00100 = C(16) TO C(17) 
VIBR .0, 0.00200 = C(17) TO C(15) 
VIBR .0, 0.00200 = C(13) TO C(16) 
VIBR .0, 0.00100 = C(18) TO C(19) 
VIBR .0, 0.00100 = C(18) TO C(22) 
VIBR .0, 0.00200 = C(19) TO P(2) 
VIBR .0, 0.00200 = C(22) TO P(2) 
VIBR .0, 0.00200 = C(22) TO C(19) 
VIBR .0, 0.00100 = C(19) TO C(20) 
VIBR .0, 0.00200 = C(20) TO C(18) 
VIBR .0, 0.00100 = C(20) TO C(21) 
VIBR .0, 0.00200 = C(21) TO C(19) 
VIBR .0, 0.00100 = C(21) TO C(22) 
VIBR .0, 0.00200 = C(22) TO C(20) 
VIBR .0, 0.00200 = C(18) TO C(21) 
VIBR .0, 0.00100 = C(113) TO C(114) 
VIBR .0, 0.00100 = C(113) TO C(117) 
VIBR .0, 0.00200 = C(114) TO P(2) 
VIBR .0, 0.00200 = C(117) TO P(2) 
VIBR .0, 0.00200 = C(117) TO C(114) 
VIBR .0, 0.00100 = C(114) TO C(115) 
VIBR .0, 0.00200 = C(115) TO C(113) 
VIBR .0, 0.00100 = C(115) TO C(116) 
VIBR .0, 0.00200 = C(116) TO C(114) 
VIBR .0, 0.00100 = C(116) TO C(117) 
VIBR .0, 0.00200 = C(117) TO C(115) 
VIBR .0, 0.00200 = C(116) TO C(113) 
VIBR .0, 0.00100 = C(118) TO C(119) 
VIBR .0, 0.00100 = C(118) TO C(122) 
VIBR .0, 0.00200 = C(119) TO P(2) 
VIBR .0, 0.00200 = C(122) TO P(2) 
VIBR .0, 0.00200 = C(122) TO C(119) 
VIBR .0, 0.00100 = C(119) TO C(120) 
VIBR .0, 0.00200 = C(120) TO C(118) 
VIBR .0, 0.00100 = C(120) TO C(121) 
VIBR .0, 0.00200 = C(121) TO C(119) 
VIBR .0, 0.00100 = C(121) TO C(122) 
VIBR .0, 0.00200 = C(122) TO C(120) 
VIBR .0, 0.00200 = C(118) TO C(121) 
U(IJ) .0, 0.02000 = P(2) TO C(13) 
U(IJ) .0, 0.02000 = P(2) TO C(18) 
U(IJ) .0, 0.02000 = P(2) TO C(113) 
U(IJ) .0, 0.02000 = P(2) TO C(13) 
U(IJ) .0, 0.02000 = P(2) TO C(118) 
U(IJ) .0, 0.02000 = P(2) TO C(113) 
U(IJ) .0, 0.02000 = P(2) TO C(118) 
U(IJ) .0, 0.02000 = C(13) TO C(14) 
U(IJ) .0, 0.02000 = C(13) TO C(17) 
U(IJ) .0, 0.02000 = C(14) TO C(15) 
U(IJ) .0, 0.02000 = C(15) TO C(16) 
U(IJ) .0, 0.02000 = C(16) TO C(17) 
U(IJ) .0, 0.02000 = C(18) TO C(19) 
U(IJ) .0, 0.02000 = C(18) TO C(22) 
U(IJ) .0, 0.02000 = C(19) TO C(20) 
U(IJ) .0, 0.02000 = C(20) TO C(21) 
U(IJ) .0, 0.02000 = C(21) TO C(22) 
U(IJ) .0, 0.02000 = C(113) TO C(114) 
U(IJ) .0, 0.02000 = C(113) TO C(117) 
U(IJ) .0, 0.02000 = C(114) TO C(115) 
U(IJ) .0, 0.02000 = C(115) TO C(116) 
U(IJ) .0, 0.02000 = C(116) TO C(117) 
U(IJ) .0, 0.02000 = C(118) TO C(119) 
U(IJ) .0, 0.02000 = C(118) TO C(122) 
U(IJ) .0, 0.02000 = C(119) TO C(120) 
U(IJ) .0, 0.02000 = C(120) TO C(121) 
U(IJ) .0, 0.02000 = C(121) TO C(122) 
SAME C(43) C(46) F(16) F(17) F(18) AND 
CONT C(43) C(46) F(17) F(18) F(16) AND 
CONT C(43) C(46) F(18) F(16) F(17) AND 
CONT C(49) C(53) F(19) F(20) F(21) AND 
CONT C(49) C(53) F(20) F(21) F(19) AND 
CONT C(49) C(53) F(21) F(19) F(20) AND 
CONT C(43) C(46) F(116) F(117) F(118) AND 
CONT C(43) C(46) F(117) F(118) F(116) AND 
CONT C(43) C(46) F(118) F(116) F(117) AND 
CONT C(49) C(53) F(119) F(120) F(121) AND 
CONT C(49) C(53) F(120) F(121) F(119) AND 
CONT C(49) C(53) F(121) F(119) F(120) 
SIMU 0.01 C(43) C(46) F(16) F(17) F(18) AND 
CONT C(43) C(46) F(17) F(18) F(16) AND 
CONT C(43) C(46) F(18) F(16) F(17) AND 
CONT C(49) C(53) F(19) F(20) F(21) AND 
CONT C(49) C(53) F(20) F(21) F(19) AND 
CONT C(49) C(53) F(21) F(19) F(20) AND 
CONT C(43) C(46) F(116) F(117) F(118) AND 
CONT C(43) C(46) F(117) F(118) F(116) AND 
CONT C(43) C(46) F(118) F(116) F(117) AND 
CONT C(49) C(53) F(119) F(120) F(121) AND 
CONT C(49) C(53) F(120) F(121) F(119) AND 
CONT C(49) C(53) F(121) F(119) F(120) 
DELU 0.01 C(43) C(46) F(16) F(17) F(18) AND 
CONT C(43) C(46) F(17) F(18) F(16) AND 
CONT C(43) C(46) F(18) F(16) F(17) AND 
CONT C(49) C(53) F(19) F(20) F(21) AND 
CONT C(49) C(53) F(20) F(21) F(19) AND 
CONT C(49) C(53) F(21) F(19) F(20) AND 
CONT C(43) C(46) F(116) F(117) F(118) AND 
CONT C(43) C(46) F(117) F(118) F(116) AND 
CONT C(43) C(46) F(118) F(116) F(117) AND 
CONT C(49) C(53) F(119) F(120) F(121) AND 
CONT C(49) C(53) F(120) F(121) F(119) AND 
CONT C(49) C(53) F(121) F(119) F(120) 
REM   HREST   START (DO NOT REMOVE THIS LINE) 
REM   HREST   END (DO NOT REMOVE THIS LINE) 
END                                                                             
;#==============================================================================
data_3-NBD
#==============================================================================

_audit_creation_method                   'Jana2006 Version : 19/05/2014'

_chemical_name_systematic
; 
.
;

_chemical_name_common                    .
_chemical_formula_moiety                 'C29 H48 P2 Rh1, C32 H12 B F24'
_chemical_formula_sum                    'C61 H60 B1 F24 P2 Rh1'
_chemical_formula_weight                 1424.8
_chemical_melting_point                  'not measured'
_chemical_compound_source                .
_chemical_absolute_configuration         .
_oxford_structure_analysis_title         '6615 (043am16)'

_symmetry_cell_setting                   monoclinic
_space_group_ssg_name                    'C2/c(0\b0)s0'

loop_
 _space_group_symop_ssg_id
 _space_group_symop_ssg_operation_algebraic
 1   x1,x2,x3,x4
 2   -x1,x2,-x3+1/2,x4+1/2
 3   -x1,-x2,-x3,-x4
 4   x1,-x2,x3+1/2,-x4+1/2
 5   x1+1/2,x2+1/2,x3,x4
 6   -x1+1/2,x2+1/2,-x3+1/2,x4+1/2
 7   -x1+1/2,-x2+1/2,-x3,-x4
 8   x1+1/2,-x2+1/2,x3+1/2,-x4+1/2

_cell_length_a                           18.6768(11)
_cell_length_b                           17.1338(7)
_cell_length_c                           19.1958(9)
_cell_angle_alpha                        90
_cell_angle_beta                         92.353(4)
_cell_angle_gamma                        90
_cell_volume                             6137.6(5)

_cell_modulation_dimension               1

loop_
 _cell_wave_vector_seq_id
 _cell_wave_vector_x
 _cell_wave_vector_y
 _cell_wave_vector_z
 1  0.000000  0.343300  0.000000
_cell_formula_units_Z                    8

_cell_measurement_reflns_used            16306
_cell_measurement_theta_min              4.14
_cell_measurement_theta_max              74.87
_cell_measurement_temperature            150.01(15)
_cell_special_details
; 
.
;

_exptl_crystal_density_diffrn            3.0828
_exptl_crystal_density_meas              'not measured'
_exptl_crystal_density_method            .
_exptl_crystal_F_000                     2888

_exptl_absorpt_coefficient_mu            3.750
_exptl_crystal_description               'block'
_exptl_crystal_size_min                  0.20 
_exptl_crystal_size_mid                  0.22 
_exptl_crystal_size_max                  0.35 
_exptl_crystal_colour                    'clear_intense_orange'
_exptl_absorpt_correction_type           'multi-scan'
_exptl_absorpt_process_details
;
CrysAlisPro, Agilent Technologies,
Version 1.171.36.32 (release 02-08-2013 CrysAlis171 .NET)
(compiled Aug  2 2013,16:46:58)
Empirical absorption correction using spherical harmonics,
 implemented in SCALE3 ABSPACK scaling algorithm.
;
_exptl_absorpt_correction_T_min          0.526
_exptl_absorpt_correction_T_max          1

_exptl_special_details                   
;
.
;

_diffrn_ambient_temperature              150.0
_diffrn_radiation_type                   'Cu K\a'
_diffrn_radiation_source                 'SuperNova (Cu) X-ray Source'
_diffrn_radiation_wavelength             1.5418
_diffrn_radiation_monochromator          'mirror'
_diffrn_measurement_device               'four-cycle diffractometer'
_diffrn_measurement_device_type          'SuperNova, Dual, Cu at zero, Atlas'
_diffrn_detector                         'Area detector'
_diffrn_detector_area_resol_mean         10.4102
_diffrn_measurement_method               '\w scans'

_diffrn_reflns_number                    64721
_diffrn_reflns_theta_min                 3.5
_diffrn_reflns_theta_max                 75.08
_diffrn_reflns_theta_full                75.08
_diffrn_measured_fraction_theta_max      0.98
_diffrn_measured_fraction_theta_full     0.98
_diffrn_reflns_av_R_equivalents          0.0394
_diffrn_reflns_av_unetI/netI             0.0259
_diffrn_reflns_limit_h_min               -22
_diffrn_reflns_limit_h_max               23
_diffrn_reflns_limit_k_min               -21
_diffrn_reflns_limit_k_max               21
_diffrn_reflns_limit_l_min               -24
_diffrn_reflns_limit_l_max               15
_diffrn_reflns_limit_index_m_1_min       -1
_diffrn_reflns_limit_index_m_1_max       1
_diffrn_reflns_reduction_process         .

_diffrn_standards_number                 .
_diffrn_standards_interval_count         .
_diffrn_standards_interval_time          .
_diffrn_standards_decay_%                .

_diffrn_radiation_probe                  X-ray

_refine_special_details
; 
.
;

_reflns_number_total                     18610
_reflns_number_gt                        14622
_reflns_threshold_expression             'I>3\s(I)'

_refine_ls_structure_factor_coef         Fsqd
_refine_ls_R_factor_gt                   0.1020
_refine_ls_wR_factor_gt                  0.2284
_refine_ls_R_factor_all                  0.1178
_refine_ls_wR_factor_ref                 0.2378
_refine_ls_goodness_of_fit_ref           3.91
_refine_ls_goodness_of_fit_gt            4.25
_refine_ls_restrained_S_gt               .
_refine_ls_restrained_S_all              .
_refine_ls_number_reflns                 18610
_refine_ls_number_parameters             659
_refine_ls_number_restraints             9
_refine_ls_number_constraints            0
_refine_ls_weighting_scheme              sigma
_refine_ls_weighting_details             'w=1/(\s^2^(I)+0.0004I^2^)'
_refine_ls_hydrogen_treatment            'constr'
_refine_ls_shift/su_max                  0.0209
_refine_ls_shift/su_mean                 0.0011
_refine_diff_density_max                 0.78
_refine_diff_density_min                 -0.36
_refine_ls_extinction_method             'none'
_refine_ls_extinction_coef               .
_refine_ls_abs_structure_details         .
_refine_ls_abs_structure_Flack           .
_refine_ls_abs_structure_Rogers          .

loop_
 _atom_type_symbol
 _atom_type_scat_dispersion_real
 _atom_type_scat_dispersion_imag
 _atom_type_scat_source
 C    0.0181  0.0091
 'International Tables Vol C tables 4.2.6.8 and 6.1.1.1'
 H    0.0000  0.0000
 'International Tables Vol C tables 4.2.6.8 and 6.1.1.1'
 B    0.0090  0.0039
 'International Tables Vol C tables 4.2.6.8 and 6.1.1.1'
 F    0.0727  0.0534
 'International Tables Vol C tables 4.2.6.8 and 6.1.1.1'
 P    0.2955  0.4335
 'International Tables Vol C tables 4.2.6.8 and 6.1.1.1'
 Rh   0.0927  3.6045
 'International Tables Vol C tables 4.2.6.8 and 6.1.1.1'

_computing_data_collection
;
CrysAlisPro, Agilent Technologies,
Version 1.171.36.32 (release 02-08-2013 CrysAlis171 .NET)
(compiled Aug  2 2013,16:46:58)
;
_computing_cell_refinement
;
CrysAlisPro, Agilent Technologies,
Version 1.171.36.32 (release 02-08-2013 CrysAlis171 .NET)
(compiled Aug  2 2013,16:46:58)
;
_computing_data_reduction
;
CrysAlisPro, Agilent Technologies,
Version 1.171.36.32 (release 02-08-2013 CrysAlis171 .NET)
(compiled Aug  2 2013,16:46:58)
;
_computing_structure_solution            'Superflip (Palatinus & Chapuis, 2007)'
_computing_structure_refinement          'JANA (Petricek et al. 2006)'
_computing_molecular_graphics            .
_computing_publication_material          .

loop_
 _restr_distance_atom_site_label_1
 _restr_distance_site_symmetry_1
 _restr_distance_atom_site_label_2
 _restr_distance_site_symmetry_2
 _restr_distance_target
 _restr_distance_target_weight_param
C8 . C9 . -999 0.05
C8 . C9' . -999 0.05
C9' . C10 . -999 0.05
C9' . C10' . -999 0.05
C9 . C10 . -999 0.05
C9 . C10' . -999 0.05
C10 . C11' . -999 0.05
C11' . C10' . -999 0.05
C11' . C12 . -999 0.05

loop_
 _atom_site_label
 _atom_site_type_symbol
 _atom_site_fract_x
 _atom_site_fract_y
 _atom_site_fract_z
 _atom_site_adp_type
 _atom_site_U_iso_or_equiv
 _atom_site_site_symmetry_multiplicity
 _atom_site_occupancy
 _atom_site_calc_flag
 _atom_site_refinement_flags
 _atom_site_disorder_assembly
 _atom_site_disorder_group
  Rh1 Rh 0 0.198995(18) 0.25 Uani 0.03082(11) 4 1 d . . .
  P1 P 0.02496(5) 0.29662(5) 0.17464(4) Uani 0.0322(2) 8 1 d . . .
  C1 C -0.0582(3) 0.0977(2) 0.2913(2) Uani 0.0559(15) 8 1 d . . .
  C2 C 0.0077(3) 0.0977(2) 0.3215(2) Uani 0.0548(16) 8 1 d . . .
  C3 C 0.0548(3) 0.0485(3) 0.2754(3) Uani 0.0649(18) 8 1 d . . .
  C7 C 0 -0.0132(4) 0.25 Uani 0.068(3) 4 1 d . . .
  C8 C 0.1187(2) 0.3136(2) 0.1549(2) Uiso 0.0406(8) 8 1 d . . .
  C9 C 0.1713(4) 0.3206(5) 0.2245(3) Uiso 0.0618(16) 8 1 d . . .
  C9' C 0.1685(4) 0.3009(4) 0.2140(4) Uiso 0.0527(17) 8 1 d . . .
  C10 C 0.2437(5) 0.2989(5) 0.1954(4) Uiso 0.074(2) 8 1 d . . .
  C10' C 0.2404(5) 0.2810(5) 0.1836(4) Uiso 0.061(2) 8 1 d . . .
  C11 C 0.2221(6) 0.2464(12) 0.1214(5) Uiso 0.040(3) 8 1 d . . .
  C11' C 0.2296(8) 0.2395(8) 0.1403(7) Uiso 0.135(4) 8 1 d . . .
  C12 C 0.1508(2) 0.2534(3) 0.1056(2) Uiso 0.0504(9) 8 1 d . . .
  C13 C -0.0202(3) 0.2864(3) 0.0878(2) Uiso 0.0554(10) 8 1 d . . .
  C14 C -0.1023(4) 0.2762(6) 0.0875(3) Uiso 0.0589(18) 8 1 d . . .
  C14' C -0.1003(5) 0.2791(8) 0.0917(5) Uiso 0.049(2) 8 1 d . . .
  C15 C -0.1290(4) 0.3086(5) 0.0222(4) Uiso 0.0657(17) 8 1 d . . .
  C15' C -0.1330(7) 0.2985(8) 0.0154(7) Uiso 0.050(3) 8 1 d . . .
  C16 C -0.0686(4) 0.3427(5) -0.0133(3) Uiso 0.0518(15) 8 1 d . . .
  C16' C -0.0711(6) 0.3367(7) -0.0216(4) Uiso 0.049(2) 8 1 d . . .
  C17 C -0.0097(3) 0.3544(3) 0.0387(3) Uiso 0.0687(13) 8 1 d . . .
  C18 C -0.0044(2) 0.3906(2) 0.2118(2) Uani 0.0529(13) 8 1 d . . .
  B1 B 0 0.2789(3) -0.25 Uani 0.0234(12) 4 1 d . . .
  C38 C -0.01382(16) 0.22022(16) -0.18460(15) Uani 0.0245(8) 8 1 d . . .
  C39 C -0.08159(18) 0.19147(18) -0.17110(17) Uani 0.0310(9) 8 1 d . . .
  C40 C -0.0934(2) 0.1380(2) -0.11826(18) Uani 0.0381(10) 8 1 d . . .
  C41 C -0.0372(2) 0.1099(2) -0.07672(18) Uani 0.0378(10) 8 1 d . . .
  C42 C 0.03117(19) 0.13569(19) -0.08946(17) Uani 0.0336(9) 8 1 d . . .
  C43 C 0.04297(17) 0.18983(18) -0.14238(16) Uani 0.0286(9) 8 1 d . . .
  C44 C -0.1664(2) 0.1073(3) -0.1073(2) Uani 0.0557(15) 8 1 d . . .
  C45 C 0.0934(2) 0.1024(2) -0.04830(20) Uani 0.0467(12) 8 1 d . . .
  C46 C 0.43228(16) 0.16254(17) 0.23309(16) Uani 0.0273(8) 8 1 d . . .
  C47 C 0.38932(18) 0.13346(19) 0.28508(17) Uani 0.0326(9) 8 1 d . . .
  C48 C 0.3348(2) 0.0795(2) 0.27097(20) Uani 0.0395(11) 8 1 d . . .
  C49 C 0.3217(2) 0.0521(2) 0.2038(2) Uani 0.0466(12) 8 1 d . . .
  C50 C 0.3642(2) 0.0787(2) 0.1522(2) Uani 0.0457(12) 8 1 d . . .
  C51 C 0.4180(2) 0.13281(19) 0.16668(18) Uani 0.0359(10) 8 1 d . . .
  C52 C 0.2902(3) 0.0534(3) 0.3295(3) Uani 0.0601(16) 8 1 d . . .
  C53 C 0.3465(4) 0.0530(3) 0.0788(3) Uani 0.078(3) 8 1 d . . .
  F7 F -0.17999(18) 0.0936(2) -0.04218(16) Uani 0.0862(13) 8 1 d . . .
  F8 F -0.21694(17) 0.1519(3) -0.1304(2) Uani 0.133(2) 8 1 d . . .
  F9 F -0.1777(2) 0.0410(3) -0.1394(3) Uani 0.151(2) 8 1 d . . .
  F10 F 0.07775(17) 0.08647(17) 0.01741(12) Uani 0.0649(10) 8 1 d . . .
  F11 F 0.14930(16) 0.1488(2) -0.04327(16) Uani 0.0771(11) 8 1 d . . .
  F12 F 0.1151(2) 0.0356(2) -0.07425(17) Uani 0.1035(16) 8 1 d . . .
  F13 F 0.2604(3) 0.1097(2) 0.3611(3) Uani 0.124(2) 8 1 d . . .
  F14 F 0.7413(2) 0.5012(2) 0.31029(18) Uani 0.1054(16) 8 1 d . . .
  F15 F 0.3295(2) 0.0181(2) 0.37980(17) Uani 0.0969(15) 8 1 d . . .
  F16 F 0.3343(3) 0.1059(2) 0.03477(16) Uani 0.1041(17) 8 1 d . . .
  F17 F 0.3207(3) -0.0140(3) 0.0731(2) Uani 0.1231(19) 8 1 d . . .
  F18 F 0.4154(2) 0.0297(2) 0.04882(19) Uani 0.0986(16) 8 1 d . . .
  H1c39 H -0.121837 0.209316 -0.199443 Uiso 0.0369 8 1 d . . .
  H1c41 H -0.045255 0.07241 -0.040192 Uiso 0.045 8 1 d . . .
  H1c43 H 0.09121 0.207141 -0.150022 Uiso 0.0328 8 1 d . . .
  H1c47 H 0.397776 0.151457 0.332344 Uiso 0.0391 8 1 d . . .
  H1c49 H 0.283737 0.015177 0.193459 Uiso 0.0545 8 1 d . . .
  H1c51 H 0.44677 0.150858 0.12912 Uiso 0.0424 8 1 d . . .
  H1c8 H 0.117334 0.363944 0.134209 Uiso 0.0484 8 1 d . . .
  H1c13 H 0.001517 0.242144 0.070335 Uiso 0.0652 8 1 d . . .
  H2c9' H 0.174322 0.367111 0.23708 Uiso 0.0578 8 1 d . . .
  H1c9' H 0.155946 0.276598 0.252209 Uiso 0.0578 8 1 d . . .
  H1c17 H -0.014351 0.401822 0.062099 Uiso 0.0809 8 1 d . . .
  H2c17 H 0.036355 0.349927 0.018668 Uiso 0.0809 8 1 d . . .
  H1c16 H -0.081976 0.391522 -0.034694 Uiso 0.0633 8 1 d . . .
  H2c16 H -0.053431 0.306582 -0.048619 Uiso 0.0633 8 1 d . . .
  H1c16' H -0.086259 0.385081 -0.043557 Uiso 0.0622 8 1 d . . .
  H2c16' H -0.052652 0.300765 -0.055096 Uiso 0.0622 8 1 d . . .
  H1c15 H -0.162836 0.350795 0.029489 Uiso 0.0785 8 1 d . . .
  H2c15 H -0.15044 0.269611 -0.007235 Uiso 0.0785 8 1 d . . .
  H1c15' H -0.169894 0.338431 0.017816 Uiso 0.0616 8 1 d . . .
  H2c15' H -0.147845 0.254674 -0.011361 Uiso 0.0616 8 1 d . . .
  H1c14 H -0.121614 0.311246 0.122149 Uiso 0.0696 8 1 d . . .
  H2c14 H -0.113418 0.22328 0.096718 Uiso 0.0696 8 1 d . . .
  H1c14' H -0.116148 0.315401 0.128322 Uiso 0.0565 8 1 d . . .
  H2c14' H -0.113372 0.227179 0.098223 Uiso 0.0565 8 1 d . . .
  H1c1 H -0.1004 0.123866 0.308109 Uiso 0.066 8 1 d . . .
  H1c2 H 0.023068 0.124121 0.364451 Uiso 0.0663 8 1 d . . .
  H1c3 H 0.091438 0.007944 0.278703 Uiso 0.0763 8 1 d . . .
  H1c7 H -0.017966 -0.04151 0.28935 Uiso 0.0801 8 1 d . . .
  H1c18 H 0.022831 0.432503 0.19265 Uiso 0.0627 8 1 d . . .
  H2c18 H -0.054082 0.399498 0.198513 Uiso 0.0627 8 1 d . . .
  H1c9 H 0.15507 0.269552 0.250731 Uiso 0.0503 8 1 d . . .
  H2c9 H 0.172092 0.362205 0.2416 Uiso 0.0503 8 1 d . . .
  H1c12 H 0.138324 0.217156 0.106691 Uiso 0.0603 8 1 d . . .
  H2c12 H 0.149741 0.265261 0.066416 Uiso 0.0603 8 1 d . . .
  H1c10 H 0.275464 0.274553 0.229294 Uiso 0.0902 8 1 d . . .
  H2c10 H 0.26541 0.340906 0.172064 Uiso 0.0902 8 1 d . . .
  H1c10' H 0.273982 0.264145 0.221529 Uiso 0.075 8 1 d . . .
  H2c10' H 0.268199 0.328199 0.168787 Uiso 0.075 8 1 d . . .
  H1c11 H 0.238314 0.195747 0.121635 Uiso 0.0557 8 1 d . . .
  H2c11 H 0.248352 0.275706 0.084374 Uiso 0.0557 8 1 d . . .
  H1c11' H 0.228102 0.182385 0.157219 Uiso 0.1469 8 1 d . . .
  H2c11' H 0.262438 0.239592 0.1018 Uiso 0.1469 8 1 d . . .

loop_
 _atom_site_aniso_label
 _atom_site_aniso_type_symbol
 _atom_site_aniso_U_11
 _atom_site_aniso_U_22
 _atom_site_aniso_U_33
 _atom_site_aniso_U_12
 _atom_site_aniso_U_13
 _atom_site_aniso_U_23
 Rh1 Rh 0.0429(2) 0.02659(18) 0.02346(17) 0 0.00759(13) 0
 P1 P 0.0311(4) 0.0378(4) 0.0279(4) 0.0013(3) 0.0033(3) 0.0087(3)
 C1 C 0.080(3) 0.0252(17) 0.066(3) -0.0097(18) 0.039(2) 0.0031(17)
 C2 C 0.095(4) 0.035(2) 0.0354(19) 0.002(2) 0.013(2) 0.0120(15)
 C3 C 0.091(4) 0.034(2) 0.071(3) 0.012(2) 0.025(3) 0.010(2)
 C7 C 0.096(6) 0.034(3) 0.076(5) 0 0.036(4) 0
 C18 C 0.048(2) 0.0308(18) 0.081(3) 0.0085(15) 0.024(2) 0.0184(18)
 B1 B 0.023(2) 0.021(2) 0.026(2) 0 -0.0011(17) 0
 C38 C 0.0264(14) 0.0213(13) 0.0257(13) 0.0002(10) 0.0004(11) -0.0019(10)
 C39 C 0.0294(16) 0.0320(16) 0.0317(15) -0.0032(12) 0.0001(12) -0.0013(12)
 C40 C 0.0370(18) 0.0395(19) 0.0382(17) -0.0104(14) 0.0053(14) 0.0011(14)
 C41 C 0.046(2) 0.0349(18) 0.0328(16) -0.0042(14) 0.0042(14) 0.0077(13)
 C42 C 0.0405(18) 0.0300(16) 0.0299(15) 0.0040(13) -0.0018(13) 0.0045(12)
 C43 C 0.0281(15) 0.0272(15) 0.0305(15) 0.0010(11) 0.0014(12) -0.0002(11)
 C44 C 0.046(2) 0.073(3) 0.049(2) -0.024(2) 0.0033(18) 0.011(2)
 C45 C 0.055(2) 0.049(2) 0.0352(18) 0.0137(18) -0.0064(16) 0.0068(15)
 C46 C 0.0259(14) 0.0222(14) 0.0334(15) -0.0005(11) -0.0028(12) 0.0019(11)
 C47 C 0.0319(16) 0.0319(16) 0.0338(16) -0.0066(13) -0.0012(13) 0.0043(12)
 C48 C 0.0386(19) 0.0352(18) 0.0446(19) -0.0099(14) 0.0002(15) 0.0059(14)
 C49 C 0.048(2) 0.0373(19) 0.053(2) -0.0214(17) -0.0106(18) 0.0079(16)
 C50 C 0.058(3) 0.0361(19) 0.043(2) -0.0144(17) -0.0062(18) -0.0019(15)
 C51 C 0.0446(19) 0.0271(16) 0.0359(17) -0.0068(14) 0.0012(14) -0.0005(13)
 C52 C 0.059(3) 0.064(3) 0.058(3) -0.030(2) 0.011(2) 0.003(2)
 C53 C 0.134(6) 0.056(3) 0.044(3) -0.043(4) 0.002(3) -0.012(2)
 F7 F 0.0663(19) 0.132(3) 0.0612(17) -0.0403(19) 0.0185(14) 0.0201(17)
 F8 F 0.0315(15) 0.203(5) 0.163(4) -0.015(2) 0.0062(19) 0.117(4)
 F9 F 0.096(3) 0.167(5) 0.193(5) -0.093(3) 0.064(3) -0.104(4)
 F10 F 0.0764(19) 0.0790(18) 0.0383(12) 0.0050(14) -0.0092(12) 0.0210(12)
 F11 F 0.0492(15) 0.102(2) 0.0780(19) -0.0038(15) -0.0216(14) 0.0391(17)
 F12 F 0.135(3) 0.098(3) 0.073(2) 0.083(2) -0.041(2) -0.0288(17)
 F13 F 0.140(4) 0.085(3) 0.154(4) -0.016(2) 0.106(3) 0.006(3)
 F14 F 0.097(3) 0.133(3) 0.087(2) -0.083(3) 0.0150(19) 0.005(2)
 F15 F 0.103(3) 0.124(3) 0.0635(19) -0.041(2) 0.0036(18) 0.0396(19)
 F16 F 0.145(4) 0.119(3) 0.0455(16) 0.031(3) -0.0264(19) -0.0214(18)
 F17 F 0.145(4) 0.137(4) 0.090(2) -0.094(3) 0.039(2) -0.068(2)
 F18 F 0.113(3) 0.111(3) 0.074(2) -0.016(2) 0.024(2) -0.035(2)

loop_
 _atom_site_Fourier_wave_vector_seq_id
 _jana_atom_site_Fourier_wave_vector_q1_coeff
    1    1

loop_
 _atom_site_displace_Fourier_atom_site_label
 _atom_site_displace_Fourier_axis
 _atom_site_displace_Fourier_wave_vector_seq_id
 _atom_site_displace_Fourier_param_cos
 _atom_site_displace_Fourier_param_sin
 Rh1     x  1     0.00457(3)      -0.00665(3)
 Rh1     y  1     0                0
 Rh1     z  1     0.00547(2)      -0.00589(2)
 P1      x  1     0.00241(7)      -0.00220(6)
 P1      y  1    -0.00440(7)      -0.00268(7)
 P1      z  1     0.00086(6)      -0.00648(6)
 C1      x  1     0.0046(4)       -0.0106(4)
 C1      y  1     0.0014(3)        0.0018(3)
 C1      z  1     0.0093(3)       -0.0073(3)
 C2      x  1     0.0048(4)       -0.0109(4)
 C2      y  1     0.0043(3)        0.0001(3)
 C2      z  1     0.0093(3)       -0.0075(3)
 C3      x  1     0.0037(5)       -0.0132(5)
 C3      y  1     0.0022(4)       -0.0025(4)
 C3      z  1     0.0109(4)       -0.0087(4)
 C7      x  1     0.0043(7)       -0.0152(7)
 C7      y  1     0                0
 C7      z  1     0.0126(5)       -0.0099(5)
 C8      x  1     0.0018(3)       -0.0015(3)
 C8      y  1    -0.0008(3)       -0.0089(3)
 C8      z  1    -0.0003(3)       -0.0069(3)
 C12     x  1     0.0037(3)       -0.0055(3)
 C12     y  1    -0.0051(4)       -0.0115(4)
 C12     z  1     0.0038(3)       -0.0070(3)
 C13     x  1     0.0020(4)       -0.0027(4)
 C13     y  1    -0.0140(4)       -0.0016(4)
 C13     z  1     0.0017(3)       -0.0062(3)
 C17     x  1    -0.0005(4)       -0.0003(4)
 C17     y  1    -0.0185(5)       -0.0049(5)
 C17     z  1    -0.0025(4)       -0.0063(4)
 C18     x  1    -0.0019(3)        0.0016(3)
 C18     y  1    -0.0034(3)       -0.0010(3)
 C18     z  1    -0.0038(4)       -0.0080(4)
 B1      x  1    -0.0031(3)       -0.0022(3)
 B1      y  1     0                0
 B1      z  1     0.0005(3)       -0.0042(3)
 C38     x  1    -0.0023(2)       -0.0026(2)
 C38     y  1    -0.0023(2)       -0.0011(2)
 C38     z  1    -0.0015(2)       -0.0053(2)
 C39     x  1    -0.0015(2)       -0.0035(2)
 C39     y  1    -0.0061(3)        0.0006(3)
 C39     z  1    -0.0024(2)       -0.0054(2)
 C40     x  1    -0.0007(3)       -0.0048(3)
 C40     y  1    -0.0079(3)        0.0013(3)
 C40     z  1    -0.0045(3)       -0.0063(3)
 C41     x  1    -0.0001(3)       -0.0057(3)
 C41     y  1    -0.0062(3)       -0.0023(3)
 C41     z  1    -0.0050(2)       -0.0069(2)
 C42     x  1    -0.0006(3)       -0.0049(3)
 C42     y  1    -0.0032(3)       -0.0043(3)
 C42     z  1    -0.0042(2)       -0.0066(2)
 C43     x  1    -0.0012(2)       -0.0034(2)
 C43     y  1    -0.0014(3)       -0.0044(2)
 C43     z  1    -0.0018(2)       -0.0058(2)
 C44     x  1     0.0000(3)       -0.0056(3)
 C44     y  1    -0.0108(4)        0.0037(4)
 C44     z  1    -0.0048(3)       -0.0059(3)
 C45     x  1     0.0002(3)       -0.0063(3)
 C45     y  1    -0.0018(3)       -0.0073(3)
 C45     z  1    -0.0037(3)       -0.0071(3)
 C46     x  1     0.0059(2)       -0.0010(2)
 C46     y  1    -0.0029(2)       -0.0017(2)
 C46     z  1    -0.0027(2)       -0.0030(2)
 C47     x  1     0.0055(3)       -0.0037(3)
 C47     y  1    -0.0050(3)        0.0007(3)
 C47     z  1    -0.0040(2)       -0.0038(2)
 C48     x  1     0.0070(3)       -0.0041(3)
 C48     y  1    -0.0069(3)        0.0009(3)
 C48     z  1    -0.0063(3)       -0.0030(3)
 C49     x  1     0.0100(3)       -0.0020(3)
 C49     y  1    -0.0076(3)       -0.0025(3)
 C49     z  1    -0.0068(3)       -0.0018(3)
 C50     x  1     0.0106(3)        0.0013(3)
 C50     y  1    -0.0051(3)       -0.0060(3)
 C50     z  1    -0.0051(3)       -0.0015(3)
 C51     x  1     0.0089(3)        0.0011(3)
 C51     y  1    -0.0026(3)       -0.0050(3)
 C51     z  1    -0.0030(2)       -0.0020(2)
 C52     x  1     0.0055(4)       -0.0071(4)
 C52     y  1    -0.0083(4)        0.0047(4)
 C52     z  1    -0.0082(3)       -0.0033(3)
 C53     x  1     0.0245(6)        0.0072(6)
 C53     y  1    -0.0094(4)       -0.0102(4)
 C53     z  1    -0.0079(3)       -0.0015(4)
 F7      x  1    -0.0022(2)       -0.0063(2)
 F7      y  1    -0.0013(3)        0.0044(3)
 F7      z  1    -0.00402(20)     -0.00613(20)
 F8      x  1    -0.0015(2)       -0.0039(2)
 F8      y  1    -0.0181(4)        0.0023(4)
 F8      z  1    -0.0123(3)       -0.0082(3)
 F9      x  1     0.0043(3)       -0.0082(3)
 F9      y  1    -0.0169(4)        0.0070(4)
 F9      z  1     0.0049(3)       -0.0064(3)
 F10     x  1    -0.0008(2)       -0.0068(2)
 F10     y  1    -0.0015(2)       -0.0059(2)
 F10     z  1    -0.00360(16)     -0.00617(16)
 F11     x  1    -0.0004(2)       -0.0043(2)
 F11     y  1    -0.0002(3)       -0.0106(3)
 F11     z  1    -0.0041(2)       -0.0072(2)
 F12     x  1    -0.0012(3)       -0.0099(3)
 F12     y  1    -0.0048(3)       -0.0086(3)
 F12     z  1    -0.0036(2)       -0.0058(2)
 F13     x  1     0.0017(3)       -0.0063(3)
 F13     y  1    -0.0087(3)        0.0061(3)
 F13     z  1    -0.0095(3)       -0.0071(3)
 F14     x  1     0.0048(3)       -0.0076(3)
 F14     y  1    -0.0082(3)        0.0058(3)
 F14     z  1    -0.0101(2)       -0.0021(2)
 F15     x  1     0.0033(3)       -0.0101(3)
 F15     y  1    -0.0047(3)        0.0062(3)
 F15     z  1    -0.0055(2)       -0.0010(2)
 F16     x  1     0.0020(3)        0.0000(3)
 F16     y  1    -0.0030(3)       -0.0128(3)
 F16     z  1    -0.00310(19)     -0.00286(19)
 F17     x  1     0.0023(3)       -0.0001(3)
 F17     y  1    -0.0042(3)       -0.0086(3)
 F17     z  1    -0.0060(2)        0.0025(2)
 F18     x  1     0.0114(3)        0.0030(3)
 F18     y  1    -0.0030(3)       -0.0062(3)
 F18     z  1    -0.0046(2)        0.0017(2)
 H1c39   x  1    -0.0019          -0.0031
 H1c39   y  1    -0.0072           0.0021
 H1c39   z  1    -0.002           -0.0052
 H1c41   x  1     0.0006          -0.0072
 H1c41   y  1    -0.008           -0.003
 H1c41   z  1    -0.0063          -0.0078
 H1c43   x  1    -0.0016          -0.0028
 H1c43   y  1     0.0007          -0.006
 H1c43   z  1    -0.0011          -0.0059
 H1c47   x  1     0.0039          -0.0054
 H1c47   y  1    -0.0053           0.0025
 H1c47   z  1    -0.0035          -0.0044
 H1c49   x  1     0.012           -0.0025
 H1c49   y  1    -0.0099          -0.0022
 H1c49   z  1    -0.0084          -0.001
 H1c51   x  1     0.0094           0.0026
 H1c51   y  1    -0.001           -0.0061
 H1c51   z  1    -0.0021          -0.0016
 H1c8    x  1     0.002            0.0013
 H1c8    y  1    -0.0032          -0.0071
 H1c8    z  1    -0.0044          -0.0033
 H1c13   x  1     0.0059          -0.0056
 H1c13   y  1    -0.0118          -0.0046
 H1c13   z  1     0.0007          -0.0043
 H1c17   x  1    -0.0027           0.0099
 H1c17   y  1    -0.0158          -0.0079
 H1c17   z  1    -0.0054          -0.0075
 H2c17   x  1    -0.0043          -0.0002
 H2c17   y  1    -0.0245          -0.0062
 H2c17   z  1    -0.0084          -0.0058
 H1c1    x  1     0.005           -0.0097
 H1c1    y  1     0.0019           0.0031
 H1c1    z  1     0.009           -0.0066
 H1c2    x  1     0.0039          -0.01
 H1c2    y  1     0.0066           0.0002
 H1c2    z  1     0.0084          -0.007
 H1c3    x  1     0.0033          -0.015
 H1c3    y  1     0.0029          -0.0041
 H1c3    z  1     0.0126          -0.0108
 H1c7    x  1     0.0024          -0.0167
 H1c7    y  1     0.0017           0.0004
 H1c7    z  1     0.0129          -0.0118
 H1c18   x  1    -0.0056           0.0031
 H1c18   y  1    -0.0033          -0.003
 H1c18   z  1    -0.0069          -0.0096
 H2c18   x  1    -0.003            0.0023
 H2c18   y  1    -0.0083           0.001
 H2c18   z  1    -0.0051          -0.0083
 H1c12   x  1     0.0196          -0.0348
 H1c12   y  1     0.0047           0.0033
 H1c12   z  1     0.0056          -0.0372
 H2c12   x  1    -0.0013           0.0265
 H2c12   y  1    -0.0185           0.0032
 H2c12   z  1     0.0085          -0.0002

loop_
_atom_site_displace_special_func_atom_site_label
_atom_site_displace_special_func_sawtooth_ax
_atom_site_displace_special_func_sawtooth_ay
_atom_site_displace_special_func_sawtooth_az
_atom_site_displace_special_func_sawtooth_c
_atom_site_displace_special_func_sawtooth_w
 C9  0.0019(6)  0.0091(11) -0.0036(6)  0.803(9)  0.6
 C9' -0.0004(5) -0.0003(16)  0.0004(7)  0.297(9)  0.4
 C10  0.0008(6)  0.0088(10) -0.0048(8) -0.197(7)  0.57
 C10' -0.0005(7)  0.0086(10) -0.0047(8)  0.298(7)  0.43
 C11  0.0125(12)  0.0558(15) -0.0093(11)  0.448(7)  0.33
 C11' -0.0028(9) -0.0049(10) -0.0035(9) -0.047(7)  0.67
 C14 -0.0069(8)  0.0370(9) -0.0070(7)  0.184(7)  0.66
 C14'  0.0000(14)  0.0228(14)  0.0089(12)  0.672(7)  0.34
 C15 -0.0069(8) -0.0260(9)  0.0201(8)  0.688(7)  0.72
 C15' -0.0135(17) -0.0135(18)  0.0107(15)  0.209(7)  0.28
 C16 -0.0133(7) -0.0364(8)  0.0074(7)  0.719(6)  0.66
 C16' -0.0158(14) -0.0154(14) -0.0019(12)  0.218(6)  0.34
 H2c9' -0.0045  0.0149 -0.0099  0.0682  0.4
 H1c9' -0.0045  0.0149 -0.0099  0.0682  0.4
 H1c16 -0.0121 -0.0356  0.0072  0.7232  0.66
 H2c16 -0.0121 -0.0356  0.0072  0.7232  0.66
 H1c16' -0.0158 -0.0132 -0.0027  0.2109  0.34
 H2c16' -0.0158 -0.0132 -0.0027  0.2109  0.34
 H1c15 -0.0076 -0.027  0.0195  0.6912  0.72
 H2c15 -0.0076 -0.027  0.0195  0.6912  0.72
 H1c15' -0.0139 -0.009  0.009  0.221  0.28
 H2c15' -0.0139 -0.009  0.009  0.221  0.28
 H1c14 -0.0063  0.0371 -0.0074  0.1895  0.66
 H2c14 -0.0063  0.0371 -0.0074  0.1895  0.66
 H1c14'  0.0002  0.0211  0.0107  0.68  0.34
 H2c14'  0.0002  0.0211  0.0107  0.68  0.34
 H1c9  0.0009  0.0313  0.009  0.5314  0.6
 H2c9  0.0009  0.0313  0.009  0.5314  0.6
 H1c10 -0.0029 -0.0183 -0.0051 -0.0592  0.57
 H2c10 -0.0029 -0.0183 -0.0051 -0.0592  0.57
 H1c10'  0.0032 -0.0041  0.0103  0.452  0.43
 H2c10'  0.0032 -0.0041  0.0103  0.452  0.43
 H1c11  0.0138  0.0554 -0.0092  0.4906  0.33
 H2c11  0.0138  0.0554 -0.0092  0.4906  0.33
 H1c11' -0.0049 -0.0116 -0.0077  0.0068  0.67
 H2c11' -0.0049 -0.0116 -0.0077  0.0068  0.67


loop_
 _geom_bond_atom_site_label_1
 _geom_bond_atom_site_label_2
 _geom_bond_site_ssg_symmetry_1
 _geom_bond_site_ssg_symmetry_2
 _geom_bond_distance_av
 _geom_bond_distance_min
 _geom_bond_distance_max
 _geom_bond_publ_flag
  Rh1 P1 . . 2.2756(15) 2.2703(15) 2.2793(15) ?
  Rh1 P1 . 2_5555 2.2755(15) 2.2703(15) 2.2793(15) ?
  Rh1 C1 . . 2.213(8) 2.208(8) 2.219(8) ?
  Rh1 C1 . 2_5555 2.213(8) 2.208(8) 2.219(8) ?
  Rh1 C2 . . 2.216(7) 2.204(7) 2.229(7) ?
  Rh1 C2 . 2_5555 2.216(7) 2.204(7) 2.229(7) ?
  P1 C8 . . 1.831(7) 1.826(7) 1.837(7) ?
  P1 C13 . . 1.849(8) 1.841(8) 1.854(8) ?
  P1 C18 . . 1.856(7) 1.844(7) 1.869(7) ?
  C1 C2 . . 1.339(13) 1.333(13) 1.345(13) ?
  C1 C3 . 2_5555 1.536(11) 1.532(12) 1.540(12) ?
  C2 C3 . . 1.526(12) 1.517(13) 1.535(13) ?
  C3 C7 . . 1.540(14) 1.515(14) 1.563(14) ?
  C8 C9 . . 1.574(10) 1.504(14) 1.698(14) ?
  C8 C9' . . 1.531(11) 1.459(15) 1.561(15) ?
  C8 C12 . . 1.542(10) 1.533(10) 1.553(10) ?
  C8 H1c8 . . 0.955(6) 0.941(7) 0.970(7) ?
  C9 C10 . . 1.562(14) 1.535(17) 1.636(17) ?
  C9' C10 . . 1.504(16) 1.494(18) 1.517(18) ?
  C9' C10' . . 1.492(15) 1.480(19) 1.512(19) ?
  C10 C10' . . 0.56(3) 0.56(3) 0.56(3) ?
  C10 C11' . . 1.465(18) 1.40(3) 1.54(3) ?
  C10' C11 . . 1.60(2) 1.47(3) 1.92(3) ?
  C10' C11' . . 1.46(2) 1.40(2) 1.53(2) ?
  C11 C11' . . 0.46(4) 0.43(4) 0.49(4) ?
  C11 C12 . . 1.530(19) 1.47(3) 1.70(3) ?
  C11' C12 . . 1.541(17) 1.46(2) 1.63(2) ?
  C13 C14 . . 1.542(13) 1.507(18) 1.645(18) ?
  C13 C14' . . 1.573(17) 1.54(3) 1.64(3) ?
  C13 C17 . . 1.517(13) 1.512(13) 1.526(13) ?
  C13 H1c13 . . 0.934(8) 0.906(8) 0.956(8) ?
  C14 C14' . . 0.98(3) 0.98(3) 0.98(3) ?
  C14 C15 . . 1.470(16) 1.207(18) 1.743(18) ?
  C14 C15' . . 1.556(19) 1.34(3) 1.86(3) ?
  C14 H1c14 . . 0.984(10) 0.970(16) 0.997(16) ?
  C14 H2c14 . . 0.993(11) 0.992(18) 0.994(18) ?
  C14 H1c14' . . 0.800(15) 0.793(16) 0.806(16) ?
  C14 H2c14' . . 0.460(16) 0.460(16) 0.460(16) ?
  C14' C15 . . 1.551(16) 1.44(3) 1.79(3) ?
  C14' H2c14 . . 0.39(2) 0.39(3) 0.39(3) ?
  C14' H1c14' . . 1.010(15) 1.00(3) 1.02(3) ?
  C14' H2c14' . . 0.981(16) 0.95(3) 1.01(3) ?
  C15 C15' . . 1.00(3) 1.00(3) 1.01(3) ?
  C15 C16 . . 1.493(13) 1.44(2) 1.59(2) ?
  C15 C16' . . 1.14(3) 0.90(3) 2.27(3) ?
  C15 H1c15 . . 0.969(10) 0.965(17) 0.974(17) ?
  C15 H2c15 . . 0.946(10) 0.929(17) 0.964(17) ?
  C15' C16' . . 1.51(2) 1.40(4) 1.63(4) ?
  C15' H2c15 . . 1.01(3) 1.01(3) 1.01(3) ?
  C15' H1c15' . . 0.975(19) 0.93(3) 1.02(3) ?
  C15' H2c15' . . 0.929(17) 0.90(3) 0.96(3) ?
  C16 C17 . . 1.537(13) 1.392(18) 1.594(18) ?
  C16' C17 . . 1.566(17) 1.34(3) 1.97(3) ?
  C16' H1c16' . . 0.954(14) 0.92(2) 0.99(2) ?
  C16' H2c16' . . 0.959(14) 0.94(3) 0.98(3) ?
  C18 C18 . 2_5555 1.475(12) 1.473(12) 1.477(12) ?
  B1 C38 . . 1.638(7) 1.636(7) 1.640(7) ?
  B1 C38 . 2_5545 1.638(7) 1.636(7) 1.640(7) ?
  B1 C46 . 7_5555 1.637(8) 1.624(8) 1.651(8) ?
  B1 C46 . 8_4545 1.637(8) 1.624(8) 1.651(8) ?
  C38 C39 . . 1.394(8) 1.386(8) 1.400(8) ?
  C38 C43 . . 1.409(7) 1.398(7) 1.419(7) ?
  C39 C40 . . 1.392(8) 1.384(8) 1.400(8) ?
  C39 H1c39 . . 1.0(18) 1.0(18) 1.0(18) ?
  C40 C41 . . 1.381(9) 1.379(9) 1.385(9) ?
  C40 C44 . . 1.485(10) 1.482(10) 1.487(10) ?
  C41 C42 . . 1.383(9) 1.378(9) 1.386(9) ?
  C41 H1c41 . . 0.969(6) 0.967(6) 0.971(6) ?
  C42 C43 . . 1.401(8) 1.387(8) 1.414(8) ?
  C42 C45 . . 1.491(9) 1.477(9) 1.505(9) ?
  C43 H1c43 . . 0.965(5) 0.961(6) 0.969(6) ?
  C44 F7 . . 1.311(9) 1.300(9) 1.317(9) ?
  C44 F8 . . 1.292(11) 1.272(11) 1.304(11) ?
  C44 F9 . . 1.320(12) 1.300(12) 1.336(12) ?
  C45 F10 . . 1.334(8) 1.322(8) 1.347(8) ?
  C45 F11 . . 1.314(9) 1.305(9) 1.322(9) ?
  C45 F12 . . 1.321(9) 1.302(9) 1.339(9) ?
  C46 C47 . . 1.398(8) 1.396(8) 1.399(8) ?
  C46 C51 . . 1.390(8) 1.382(8) 1.398(8) ?
  C47 C48 . . 1.396(9) 1.392(9) 1.400(9) ?
  C47 H1c47 . . 0.965(5) 0.963(5) 0.969(5) ?
  C48 C49 . . 1.385(9) 1.382(9) 1.388(9) ?
  C48 C52 . . 1.496(11) 1.492(11) 1.499(11) ?
  C49 C50 . . 1.376(10) 1.371(10) 1.381(10) ?
  C49 H1c49 . . 0.965(7) 0.963(7) 0.966(7) ?
  C50 C51 . . 1.387(9) 1.382(10) 1.394(10) ?
  C50 C53 . . 1.517(11) 1.494(11) 1.553(11) ?
  C51 H1c51 . . 0.969(6) 0.967(6) 0.971(6) ?
  C52 F13 . . 1.284(11) 1.265(11) 1.304(11) ?
  C52 F14 . 5_4455 1.320(11) 1.304(11) 1.335(11) ?
  C52 F15 . . 1.341(10) 1.331(10) 1.352(10) ?
  C53 F16 . . 1.294(11) 1.228(12) 1.393(12) ?
  C53 F17 . . 1.286(13) 1.220(14) 1.381(14) ?
  C53 F18 . . 1.484(15) 1.198(15) 1.777(15) ?
  H1c14 H1c14' . . 0.930303(10) 0.930303(10) 0.930303(10) ?
  H1c14 H2c14' . . 0.6293(10) 0.6235(10) 0.6351(10) ?
  H2c14 H1c14' . . 0.8729(10) 0.8546(10) 0.8914(10) ?
  H2c14 H2c14' . . 0.915564(3) 0.915564(3) 0.915564(3) ?

;                                                                             
;
